# Supplementary material for: Differential Impacts of the Head on Platynereis dumerilii Peripheral Circadian Rhythms
Source: Front Physiol. 2019 Jul 11;10:900. doi: 10.3389/fphys.2019.00900 (PMC6638195; doi:10.3389/fphys.2019.00900)
Supplement: Supplementary file 3 [file Data_Sheet_2.xlsx]

## Sheet: individual activity data 
Note: Each time bin contains the distance moved of a worm´s centerpoint within 6 minutes, given in abitrary units. Worms were subjected to an 16h light/8h dark light regime for the first 3 days followed by 4 days of constant darkness (time bins during darkness are depicted in a grey background).
		intact worms (exp1 20180828)										intact worms (exp2 20190922)										headless worms (exp1 20180828)														headless worms (exp2 20190922)
time bin	ZT/CT	#1	#2	#3	#4	#5	#6	#7	#8	#9	#10	#11	#12	#13	#14	#15	#16	#17	#18	#19	#20	#1	#2	#3	#4	#5	#6	#7	#8	#9	#10	#11	#12	#13	#14	#15	#16	#17	#18	#19	#20	#21	#22	#23	#24	#25	#26	#27	#28
1	8	57	1716	139	127	193	1468	297	97	120	75	76	70	164	62	73	99	348	160	90	122	798	143	6325	190	298	2750	355	285	629	487	95	146	115	463	116	235	477	155	744	250	272	273	132	465	112	229	508	190
2	8.1	89	1322	114	92	302	5099	352	514	137	128	85	68	136	51	323	262	108	76	58	266	1465	250	3975	206	220	4073	466	580	802	365	149	101	158	462	125	269	487	170	765	196	223	83	176	303	103	235	135	182
3	8.2	42	283	123	384	317	2377	101	652	139	61	58	119	163	35	158	144	118	153	127	164	239	402	3891	405	121	548	545	254	414	340	212	92	157	600	256	153	302	165	715	131	292	776	240	127	105	212	151	227
4	8.3	114	97	164	1188	218	1037	107	568	113	81	75	56	170	18	112	180	191	227	2027	117	320	320	3195	762	136	370	13779	355	393	306	134	158	274	367	276	448	370	182	714	173	154	337	394	143	95	319	225	128
5	8.4	110	75	973	281	199	478	179	107	146	99	51	131	125	45	58	160	596	116	1826	137	144	353	4552	1055	148	409	807	684	401	382	364	112	171	196	234	404	464	173	754	237	152	156	262	296	117	400	194	208
6	8.5	68	91	114	184	216	246	177	76	111	92	69	174	112	46	148	624	493	91	980	176	482	206	3968	600	247	9763	547	263	589	438	152	115	183	418	185	413	576	212	668	172	204	174	109	437	251	361	312	226
7	8.6	71	108	92	73	225	468	135	85	415	85	174	103	127	256	94	352	819	147	499	98	426	315	3840	356	263	3123	557	169	817	537	180	98	135	374	139	469	190	215	676	151	171	146	241	397	115	324	683	173
8	8.7	261	91	106	70	275	711	382	134	438	355	1017	374	73	494	56	80	447	239	753	111	131	263	3509	263	325	3113	260	165	504	573	307	158	192	499	258	340	276	132	592	153	166	174	268	409	96	490	156	201
9	8.8	313	92	120	60	221	815	144	93	326	55	1443	102	107	390	74	101	431	150	82	320	167	205	3769	284	317	3145	175	157	418	298	190	165	188	408	228	259	212	192	631	106	323	126	320	499	58	214	105	149
10	8.9	61	578	541	73	276	1432	87	95	145	142	1442	154	348	522	81	107	175	786	72	936	463	174	3217	306	313	2470	363	208	618	498	324	125	126	338	266	295	151	160	751	110	271	175	380	507	117	280	606	76
11	9	63	511	152	79	269	232	185	87	137	62	1467	82	87	57	84	356	161	548	73	82	213	114	2299	409	455	2162	296	247	551	447	123	149	191	536	137	432	459	266	669	224	237	178	256	567	92	377	132	90
12	9.1	44	1766	110	78	163	641	136	76	170	787	550	108	96	65	92	207	139	519	330	103	254	128	4366	318	194	3652	378	285	350	229	427	125	98	343	355	397	494	154	844	76	105	234	249	249	102	246	190	221
13	9.2	56	1428	102	181	197	1808	84	144	126	451	492	88	582	66	73	155	126	100	232	99	233	99	3973	339	236	2037	414	216	380	254	168	110	112	143	288	417	477	155	869	267	254	162	423	349	201	342	200	400
14	9.3	76	146	132	96	196	552	85	81	110	259	97	61	486	63	91	193	147	116	91	98	139	154	5951	405	125	2119	343	293	355	299	200	114	147	495	148	378	217	157	673	133	441	146	281	250	72	195	132	180
15	9.4	62	87	258	66	205	296	91	146	293	98	57	131	72	82	88	337	414	167	94	85	399	210	4897	384	546	2006	520	219	764	462	309	127	155	439	249	527	252	287	613	164	234	130	298	178	91	266	132	198
16	9.5	74	58	323	85	224	353	204	107	157	73	79	138	93	76	350	610	300	68	187	191	320	177	3951	1074	764	243	364	385	277	202	99	110	296	514	157	239	375	122	684	167	235	349	333	310	140	384	509	284
17	9.6	89	47	989	102	197	459	332	109	287	77	79	109	70	193	223	364	152	66	93	107	114	330	1204	1099	775	194	1193	261	223	235	166	76	185	647	168	326	471	136	709	289	165	153	222	370	99	301	190	140
18	9.7	79	49	785	83	153	1405	784	101	281	380	43	85	90	992	85	151	302	68	56	265	319	274	6713	1041	514	375	217	232	461	364	439	73	116	350	308	280	192	127	589	168	296	117	263	293	78	326	92	112
19	9.8	88	88	727	151	258	552	318	146	118	74	116	95	138	395	94	101	116	240	55	117	153	752	2690	342	275	431	460	176	383	559	337	123	153	329	105	251	479	140	578	184	347	300	266	290	80	418	595	197
20	9.9	65	100	641	77	155	1615	166	99	122	97	270	131	172	328	90	70	223	1374	95	105	379	208	234	588	367	4514	2792	145	434	211	171	164	102	364	239	531	458	95	555	205	196	155	310	221	74	332	435	227
21	10	50	97	984	395	208	222	101	52	106	483	317	70	134	140	86	75	101	1781	202	103	446	381	206	356	159	7026	2382	469	319	230	124	98	185	445	217	274	510	148	856	208	152	184	300	194	139	563	443	132
22	10.1	54	173	780	474	250	157	122	109	118	922	99	164	179	154	70	99	141	596	91	100	285	378	501	321	212	1115	8619	545	169	313	287	89	284	486	229	252	567	80	642	159	201	428	365	242	210	237	72	134
23	10.2	85	356	1400	520	187	131	113	100	114	536	68	486	170	57	378	103	325	730	81	86	298	248	2031	312	303	192	5100	156	468	762	177	235	145	476	275	322	595	209	626	199	198	114	206	336	234	427	96	160
24	10.3	78	258	905	205	119	133	123	82	139	83	67	140	113	26	549	89	220	42	47	102	381	280	4890	366	351	266	13152	105	512	225	105	101	262	192	245	281	536	197	583	95	259	162	256	297	100	524	131	148
25	10.4	79	40	1168	98	229	630	130	155	134	73	45	95	207	66	413	173	180	61	52	143	282	212	5628	611	391	231	3114	342	551	169	152	107	144	457	166	197	358	324	601	149	231	151	285	123	174	276	118	226
26	10.5	195	51	940	90	171	537	131	57	144	65	37	249	83	109	199	101	455	69	78	97	469	285	9161	463	467	171	12973	246	310	417	253	108	255	483	333	108	258	104	624	74	162	115	340	193	90	310	109	156
27	10.6	93	47	1012	68	121	557	259	86	132	72	63	345	758	229	920	66	286	79	81	549	240	320	4745	404	120	347	13334	225	325	239	515	84	262	478	162	335	185	205	541	220	180	143	397	526	136	249	494	150
28	10.7	68	55	278	205	274	360	297	97	171	43	73	452	358	66	1016	248	335	53	60	871	280	331	2876	578	251	421	7811	301	468	206	74	96	239	523	187	255	122	131	540	91	364	102	481	216	109	260	324	148
29	10.8	110	78	947	149	369	358	379	104	403	78	72	62	134	23	426	421	212	89	60	659	210	412	2473	446	300	2405	7048	163	294	296	194	86	280	442	93	307	231	245	569	97	189	76	288	181	140	202	110	709
30	10.9	477	77	546	94	312	128	379	1421	91	64	99	219	111	62	373	118	208	74	53	112	245	331	4407	427	338	3026	1457	240	895	135	184	98	186	363	252	129	432	210	609	201	349	98	263	283	117	551	99	992
31	11	590	79	82	89	596	158	182	200	144	47	58	112	248	65	1500	85	314	73	84	153	123	500	1047	339	277	266	119	178	419	168	190	87	102	529	201	203	424	207	568	262	274	402	385	371	119	375	174	875
32	11.1	85	51	793	81	303	549	155	109	267	56	186	130	101	64	295	76	207	54	38	67	127	399	4065	368	551	3921	199	162	271	461	131	101	281	445	152	366	394	174	577	205	132	217	335	343	94	388	187	1033
33	11.2	66	198	368	73	211	297	113	96	411	107	223	165	100	60	79	112	120	97	86	62	131	213	15575	692	808	3194	646	240	549	142	240	145	107	459	150	163	274	133	561	118	181	111	375	571	260	389	91	1110
34	11.3	106	214	420	53	596	231	114	59	127	120	1139	163	361	77	69	79	140	941	176	66	123	233	10058	911	1713	1866	255	373	342	252	99	158	120	433	131	430	368	112	577	333	297	141	350	273	114	197	100	1159
35	11.4	56	132	89	59	276	85	397	83	530	127	1070	150	1401	66	44	69	308	1914	74	92	263	182	6854	264	1591	2756	488	396	341	299	78	111	159	541	127	262	364	139	885	171	211	92	202	341	79	324	87	991
36	11.5	72	953	88	58	281	329	81	97	108	85	369	144	170	99	67	64	106	1163	94	95	134	337	3491	383	167	2706	416	167	542	151	264	88	210	605	197	295	325	339	861	103	211	149	211	339	93	354	183	1075
37	11.6	60	481	90	267	197	275	136	86	91	70	91	389	151	880	69	114	294	909	102	85	316	202	3709	525	248	344	296	378	373	262	234	229	252	604	260	387	329	298	947	163	116	135	202	197	131	221	93	1153
38	11.7	72	179	68	59	313	155	166	63	108	103	71	575	80	1213	113	273	265	144	676	88	390	301	3464	180	629	316	254	379	297	289	212	157	203	519	302	222	314	249	1070	128	343	193	342	272	99	690	638	1338
39	11.8	77	72	360	93	248	195	149	84	431	85	97	298	130	175	63	122	500	78	1001	144	187	149	2851	395	258	307	276	147	410	211	311	140	163	338	125	349	550	229	1032	126	178	180	168	195	160	436	428	1233
40	11.9	147	74	66	94	329	126	160	90	177	217	60	1021	217	336	68	75	274	74	628	756	179	267	316	398	300	318	577	153	187	231	271	87	199	228	188	217	399	152	763	115	230	232	251	298	108	207	99	1284
41	12	82	61	72	86	266	180	85	62	106	355	63	167	162	28	88	79	579	96	294	71	197	601	681	359	449	438	185	174	266	199	243	92	213	329	212	319	829	252	766	122	332	156	398	196	83	298	142	1324
42	12.1	77	49	62	88	197	154	139	107	113	96	54	87	115	56	90	124	135	140	457	107	202	150	16826	558	165	167	327	218	402	239	135	55	184	213	218	346	394	81	866	146	209	244	335	235	118	347	131	1093
43	12.2	66	68	101	560	665	149	226	94	201	60	88	110	183	48	66	121	335	139	117	100	312	202	9106	546	136	216	640	294	342	221	360	86	178	512	410	298	441	113	763	157	405	278	292	419	101	377	154	1389
44	12.3	246	48	61	632	3493	243	120	105	214	77	117	74	165	97	63	152	397	178	52	96	459	270	7688	338	265	2987	251	315	432	240	354	100	363	459	153	423	302	200	806	79	359	149	354	230	131	301	190	1269
45	12.4	175	60	77	91	423	141	77	101	107	65	83	95	367	77	297	84	107	155	79	127	361	201	4453	295	565	699	488	223	364	159	326	120	182	365	146	664	217	244	872	198	216	161	205	302	109	251	138	1354
46	12.5	81	45	603	56	354	155	222	61	89	59	100	80	302	173	257	86	100	56	74	99	406	185	5257	226	424	230	222	144	265	293	213	193	182	488	184	231	265	317	908	102	179	191	190	417	162	137	118	1409
47	12.6	92	44	800	94	541	81	97	86	95	105	50	88	98	123	79	101	135	112	66	134	194	255	2480	458	288	145	176	168	366	129	224	69	95	340	141	234	301	143	325	166	205	205	235	405	143	256	78	1075
48	12.7	65	40	182	87	479	370	77	32	225	218	108	86	73	261	69	120	136	134	78	97	140	155	3253	433	383	128	320	219	452	174	153	112	212	319	347	233	196	257	1054	202	206	187	290	426	124	202	271	1420
49	12.8	66	56	88	178	300	1294	115	86	85	63	109	85	52	649	66	199	231	94	97	86	346	227	14998	1041	1095	3795	765	110	999	333	380	116	134	161	366	374	600	158	896	157	249	138	442	192	142	190	398	1261
50	12.9	72	66	62	148	681	182	497	71	97	71	358	166	234	1062	89	229	226	111	76	140	360	184	5475	545	932	3667	309	276	466	484	430	125	121	182	297	438	965	146	863	303	250	380	317	196	106	265	140	1368
51	13	81	117	932	106	657	127	411	134	152	88	241	155	261	1574	96	113	159	184	102	179	179	630	546	249	460	5430	330	188	120	317	521	112	138	439	278	237	801	205	1031	159	160	787	312	226	105	266	139	1235
52	13.1	103	230	610	114	319	100	448	107	368	80	322	75	116	870	56	97	159	617	91	81	464	120	3179	508	256	2225	250	238	285	284	354	114	192	421	318	275	568	187	831	315	228	432	162	177	140	291	154	1404
53	13.2	80	306	93	197	589	114	317	126	368	71	284	102	147	268	55	170	117	295	152	121	398	123	12554	323	500	1737	746	186	360	283	165	114	263	445	352	264	702	322	1004	151	195	136	281	466	155	288	93	1391
54	13.3	131	93	137	111	290	125	288	743	117	270	122	73	145	39	60	206	108	162	1756	138	303	250	8904	466	314	290	287	92	322	381	187	124	133	184	243	271	397	265	979	156	220	231	226	503	149	325	118	1349
55	13.4	90	85	83	99	530	150	91	220	116	68	89	104	611	820	60	178	276	83	55	158	292	456	3643	443	313	207	191	151	566	280	515	117	234	320	153	249	92	231	808	191	290	128	361	378	142	345	169	1174
56	13.5	76	81	102	95	480	1361	76	373	109	84	79	62	347	1115	147	99	324	101	54	271	395	481	4992	872	436	234	122	130	286	209	567	100	186	341	174	406	273	143	1112	120	212	123	190	470	139	213	155	1322
57	13.6	150	72	921	80	618	2048	119	71	70	111	87	149	817	443	65	76	401	97	109	214	314	134	4348	625	366	187	551	203	396	155	133	106	137	422	165	234	328	90	872	103	195	120	283	106	162	253	122	1419
58	13.7	95	94	93	99	409	2589	131	74	91	263	289	163	136	286	61	518	217	74	62	128	463	245	3598	403	219	3337	706	156	612	220	249	166	123	245	143	367	201	312	951	181	149	132	252	147	245	202	138	1842
59	13.8	78	305	121	68	707	412	115	78	100	113	48	169	189	124	99	349	252	97	82	119	398	265	3576	651	606	828	313	209	273	172	190	119	170	321	175	248	242	297	810	93	307	193	257	136	119	283	174	1680
60	13.9	73	1376	127	63	294	257	175	88	118	234	62	167	131	118	108	236	141	48	43	113	295	292	16206	617	563	222	382	105	467	333	139	215	146	358	313	225	803	291	845	72	138	117	435	832	127	441	659	1382
61	14	82	697	85	66	1954	107	172	67	320	161	84	138	82	253	73	73	133	616	109	101	336	315	9432	604	839	478	498	185	440	269	282	139	212	564	421	327	290	240	596	165	250	141	319	112	119	406	198	1384
62	14.1	89	88	75	229	3104	235	190	47	82	168	48	113	1059	511	47	87	148	519	185	152	394	430	4625	521	487	4294	1655	107	587	194	230	192	237	581	221	271	525	198	596	130	183	163	270	529	47	415	134	1280
63	14.2	108	179	84	699	3091	344	206	77	111	62	62	132	521	64	48	87	255	164	68	400	276	225	4084	372	801	1551	195	115	543	311	483	103	238	445	333	372	301	139	1006	223	159	154	323	468	27	289	111	1587
64	14.3	103	461	107	1289	3156	120	551	58	101	211	80	80	182	117	92	94	841	600	85	554	444	499	5268	485	463	1283	360	192	351	323	212	381	202	281	175	281	441	196	752	197	224	221	396	532	55	318	636	1479
65	14.4	95	88	450	115	2685	107	156	79	110	642	57	119	143	29	115	162	104	136	124	111	409	126	2743	346	233	1929	162	239	298	333	105	126	126	326	203	186	97	233	993	95	280	186	321	285	93	275	197	1409
66	14.5	84	73	102	232	976	161	128	52	134	793	202	123	564	131	303	266	275	852	65	99	280	250	2222	379	202	1747	382	225	447	584	179	142	224	438	234	510	102	209	754	244	259	200	391	273	149	247	105	1577
67	14.6	98	89	102	86	220	95	124	79	135	323	121	111	275	407	1031	54	103	1109	58	118	218	311	9217	221	562	5156	246	105	469	407	359	79	330	303	280	275	432	209	887	195	259	187	318	275	232	230	181	1586
68	14.7	225	78	138	93	833	103	145	62	154	52	56	1049	786	204	210	58	88	976	227	105	242	87	3833	636	310	2168	305	99	500	222	173	100	143	475	200	382	423	240	996	147	166	165	225	1064	66	136	316	1083
69	14.8	454	74	80	85	208	131	179	82	278	44	58	1184	145	321	63	93	108	563	91	101	358	188	3811	852	238	3267	255	224	211	191	256	161	244	383	244	497	147	340	667	135	162	156	238	360	58	226	392	1156
70	14.9	114	120	789	54	317	392	126	72	135	71	236	1019	72	53	70	132	90	95	68	99	310	243	4297	443	826	237	620	95	504	269	260	82	172	470	142	259	578	418	1042	181	239	246	215	371	128	316	330	1665
71	15	79	205	136	66	342	308	98	182	138	60	235	90	109	86	976	393	101	82	174	72	252	317	4566	246	542	3171	412	120	620	407	151	79	141	263	267	371	234	162	1031	102	235	162	363	377	102	232	127	1531
72	15.1	76	59	67	348	140	535	99	90	352	198	619	164	138	137	878	193	143	86	498	85	232	232	4677	441	530	5280	507	300	708	371	196	89	366	338	196	289	302	169	663	134	186	417	434	282	100	325	188	275
73	15.2	64	61	488	55	484	49	76	93	346	85	135	143	104	50	214	146	171	79	93	92	432	455	4154	411	960	2653	402	285	524	205	174	104	266	377	215	399	94	140	1159	101	351	140	285	388	187	319	137	371
74	15.3	86	53	77	79	527	79	443	176	126	108	136	90	196	259	82	78	212	91	340	66	396	407	3076	460	283	2945	457	141	364	162	161	106	214	455	353	404	249	145	790	124	234	97	266	162	112	286	107	462
75	15.4	77	52	71	543	268	49	214	87	157	64	145	98	597	585	53	93	516	124	356	483	342	312	5271	611	920	271	2338	137	452	223	270	210	74	297	122	282	496	212	716	151	350	114	303	278	98	407	142	248
76	15.5	57	54	99	580	155	35	353	93	120	76	400	125	317	782	61	43	287	172	82	885	297	652	7136	674	179	197	1778	111	479	220	115	108	125	427	273	256	309	163	969	157	212	187	243	231	159	163	143	218
77	15.6	93	68	88	74	205	38	97	102	136	83	211	175	100	234	157	109	455	692	78	826	264	374	8563	1008	147	201	289	277	363	430	84	129	157	306	406	359	330	169	756	192	306	172	177	286	137	218	389	410
78	15.7	73	102	140	55	189	15	127	93	148	80	59	213	54	55	253	53	347	403	58	140	344	250	3839	509	237	3188	1643	197	526	333	237	135	156	592	216	246	346	283	743	160	159	263	276	654	148	338	224	529
79	15.8	138	114	73	86	331	333	99	138	107	43	52	578	117	89	360	102	421	1127	75	120	292	213	688	381	511	2563	580	184	502	367	314	98	260	246	110	353	502	214	851	142	347	233	247	438	112	299	190	454
80	15.9	80	53	663	71	207	335	66	68	376	74	168	3327	213	503	257	318	317	718	357	282	283	68	281	492	242	1878	534	287	486	466	139	93	265	428	314	644	293	338	745	700	432	311	940	574	444	452	359	329
81	16	294	1841	1578	893	1911	772	250	457	527	251	1746	3669	1316	2750	1213	1686	1991	3214	1971	1591	779	375	2581	668	651	5047	687	380	645	370	848	333	1247	986	396	546	207	286	1233	242	388	375	383	317	348	532	259	406
82	16.1	839	1845	855	2361	11220	1275	453	939	1824	1517	489	2917	2134	2629	1730	1523	1288	3514	3380	1998	511	331	5320	326	650	9076	513	147	558	317	607	195	247	820	573	325	253	194	1012	369	242	192	490	472	335	570	92	218
83	16.2	5151	3729	1917	1951	13626	1614	1836	116	1264	8071	1824	2002	983	2911	537	1556	1718	2290	4106	1284	327	205	2327	798	759	7023	577	171	358	290	408	226	775	464	505	314	465	155	1147	353	319	441	283	406	164	439	97	336
84	16.3	16311	3018	771	2320	17037	4914	1580	554	191	18828	1866	1884	1038	921	910	764	936	1922	7801	934	469	275	2725	688	470	3760	4747	220	522	519	369	354	318	484	667	425	273	162	898	243	366	380	372	396	242	407	148	412
85	16.4	15139	972	803	11181	14896	8511	403	10018	158	22026	1263	172	6116	1692	108	1169	1107	1508	10553	1606	412	653	3945	477	375	2588	8240	214	447	445	482	227	333	484	155	588	325	145	741	321	224	233	400	510	159	460	153	305
86	16.5	13561	2763	2535	24895	9483	8725	338	14317	988	9115	864	308	7999	1518	279	551	94	2612	8760	2320	417	368	4357	710	545	2613	721	188	523	375	338	329	367	713	140	376	336	99	755	273	308	333	216	231	159	368	132	260
87	16.6	16942	3871	1085	1807	14026	10024	769	459	266	14356	3268	82	13761	532	161	491	357	294	11369	3468	369	134	2572	604	449	4499	192	285	775	227	638	213	553	512	411	382	584	120	873	391	276	437	329	378	142	307	155	267
88	16.7	12463	7275	957	5137	12630	11310	492	14140	794	17315	13565	1005	17438	460	1336	180	457	1116	12935	7677	531	423	874	410	838	5751	311	382	606	263	277	193	328	520	261	591	724	407	907	346	489	398	390	292	126	443	316	870
89	16.8	471	13161	1450	20498	14476	8149	8267	3994	1073	17792	16408	121	17747	838	260	927	675	2153	5516	7335	624	803	797	682	405	2643	295	276	733	387	420	343	382	509	366	263	221	146	1179	438	373	434	292	536	209	453	128	769
90	16.9	1517	8020	1098	21251	13504	8647	4723	308	116	17292	19326	1004	11971	4227	419	1407	349	863	12234	7515	401	287	805	409	526	3893	571	164	415	429	120	214	332	726	336	264	337	241	1237	366	441	274	319	730	145	568	126	352
91	17	412	7596	263	15840	10135	10696	15582	662	460	19623	18212	279	1755	3176	2806	4482	516	7073	14289	8099	657	200	401	277	505	4665	301	153	740	488	376	198	353	654	441	213	397	150	890	254	304	382	449	353	306	506	115	435
92	17.1	381	7846	354	17258	8676	8941	7215	20976	120	4023	15298	1773	1123	4404	8146	5190	380	13072	10846	8892	353	181	356	669	2944	978	432	168	664	220	168	194	419	685	289	384	402	143	811	339	411	622	430	313	247	371	263	364
93	17.2	129	8124	687	8504	829	10163	1297	11311	851	1177	12886	1282	1137	4123	15276	6733	629	14400	13614	5689	374	181	570	439	6941	1601	327	469	913	201	315	165	510	375	570	337	721	286	752	229	305	368	414	481	219	503	106	414
94	17.3	594	11501	444	16445	10543	7154	339	799	2160	822	13886	3414	581	3327	19867	5629	697	13670	13810	6225	366	539	763	597	754	2568	538	460	617	373	102	324	258	411	371	472	611	236	977	512	375	379	268	478	165	720	166	360
95	17.4	98	14071	152	9266	11223	7579	212	246	6708	87	1308	6977	108	5016	19056	5614	643	16193	13552	7640	305	227	867	692	585	2380	419	258	531	534	106	207	415	440	491	510	1233	129	785	515	177	287	302	373	165	626	747	379
96	17.5	101	15184	1560	663	6920	9883	135	133	8441	79	543	7522	138	2459	13361	3985	1004	3464	13311	8548	356	396	668	1403	516	1155	301	253	488	460	271	325	257	619	446	272	805	178	616	312	341	271	301	230	164	595	469	918
97	17.6	66	1423	1197	1682	2364	11363	134	143	11555	241	392	7085	216	1779	11605	5467	696	2121	13685	9079	336	563	969	873	440	1156	689	124	433	414	188	338	188	765	147	574	625	153	718	461	218	283	411	238	224	515	440	305
98	17.7	109	1186	1283	1422	2764	7960	410	659	12326	1449	616	4351	1160	1966	16767	5375	74	2407	14411	7747	559	270	1033	679	620	2908	167	266	523	320	280	168	273	467	222	498	784	159	1046	420	252	386	370	416	97	860	182	335
99	17.8	70	965	659	2278	7533	10274	114	338	2245	2206	364	1874	2031	812	7279	7931	164	1342	11247	7842	278	585	601	1159	406	10147	458	323	386	251	106	189	413	226	352	287	195	126	799	188	241	280	532	272	155	619	182	440
100	17.9	1209	1151	128	1032	7034	7286	325	1705	582	2004	336	1302	595	1210	17557	4777	77	400	11983	7656	404	446	494	1154	550	2254	527	216	388	607	293	239	546	337	582	206	248	170	658	331	237	367	376	202	104	546	451	425
101	18	528	1243	2381	1915	9437	5949	519	97	386	115	321	437	955	603	13675	5777	64	1348	8872	7227	545	190	484	1088	1181	1388	330	257	540	519	166	159	437	629	444	171	299	239	843	274	174	448	359	582	318	561	146	207
102	18.1	98	1177	1332	4841	1556	496	354	107	128	822	1214	536	334	1343	4900	5348	106	772	9604	7427	302	151	483	385	639	791	233	153	583	614	205	185	338	478	304	208	318	281	568	489	349	369	484	230	121	673	151	231
103	18.2	72	126	89	23948	5441	1001	114	94	200	230	157	281	1030	875	10788	3455	82	3974	15665	2517	385	345	491	732	647	4357	465	356	339	457	209	197	236	350	317	350	488	217	665	295	260	182	406	346	244	920	255	277
104	18.3	121	127	719	15806	2043	2072	291	97	130	100	152	111	1305	404	14989	1516	92	11129	10760	1446	238	409	2092	792	497	1200	495	282	455	402	391	342	338	497	352	309	114	200	637	327	470	202	400	281	171	581	253	278
105	18.4	131	262	747	1101	1686	8030	56	176	132	60	137	153	862	569	9006	1326	730	13536	11659	1498	226	474	765	661	661	3883	632	309	372	473	671	288	203	457	403	331	352	139	701	285	362	129	308	328	136	728	172	251
106	18.5	237	657	509	1345	1336	5783	96	114	492	83	149	1941	170	678	1221	4474	1356	10167	12765	1791	302	168	370	606	521	1890	440	130	641	182	822	276	129	477	413	241	388	143	613	318	372	431	208	244	151	616	158	324
107	18.6	644	1896	79	74	2412	1192	99	302	237	155	108	2712	646	92	609	4829	456	11276	14046	243	251	290	384	591	470	3590	576	287	360	427	591	179	185	657	295	400	218	327	361	284	383	586	431	180	162	466	155	223
108	18.7	431	600	211	187	2669	1239	111	501	109	79	120	580	2432	104	613	1701	426	11271	5080	682	335	374	5002	408	640	4313	256	216	280	360	756	162	273	967	261	325	366	168	497	186	525	254	336	275	162	551	114	214
109	18.8	600	170	2122	118	4760	556	119	443	101	79	133	194	1334	79	257	3371	229	18668	7432	359	316	647	2940	509	507	1375	279	304	372	405	831	146	425	563	576	256	549	167	605	414	352	172	324	559	285	543	265	395
110	18.9	61	168	1133	914	11989	2116	454	1355	143	67	714	235	2583	47	154	732	50	16308	16048	168	275	411	933	524	389	2077	506	132	273	119	766	186	427	697	411	385	313	169	515	277	353	321	310	338	172	603	137	471
111	19	67	1031	65	133	6078	308	202	195	163	68	2408	1563	173	60	122	713	272	17473	7226	963	507	464	607	564	314	1806	375	215	328	426	646	240	379	497	422	518	185	161	2186	449	306	156	385	442	258	745	148	302
112	19.1	318	1069	1387	331	1007	396	159	93	732	289	748	444	274	250	195	2183	266	9057	5502	694	322	252	698	480	623	3345	578	253	301	484	509	139	338	690	327	301	365	214	431	269	391	194	291	283	134	392	133	208
113	19.2	68	1865	1779	2088	851	348	1860	110	857	1640	486	553	1236	664	358	1942	1433	9586	8095	398	338	334	680	572	515	1192	369	100	257	518	283	171	299	663	408	246	494	154	345	304	303	228	243	291	114	246	221	206
114	19.3	71	1835	260	1205	3834	208	1509	102	1015	649	441	290	958	409	65	1021	1305	13334	12694	756	435	391	425	512	406	3051	467	371	311	420	140	254	458	489	470	241	333	187	315	461	387	164	393	485	276	293	143	179
115	19.4	86	1819	84	1019	11879	523	155	1202	96	86	70	296	1410	105	57	1443	310	15336	7221	1142	329	389	375	986	378	3436	355	218	364	286	389	196	333	729	263	329	207	265	436	347	390	198	433	425	188	396	218	299
116	19.5	83	862	66	70	1571	1782	233	979	130	74	49	800	1806	361	67	1598	80	6292	6223	1025	344	347	567	452	289	2925	202	257	456	181	488	150	289	986	263	299	502	290	572	352	364	310	470	406	155	628	163	383
117	19.6	51	675	306	234	5413	2153	1115	108	109	81	66	153	1264	73	830	1090	105	1634	7168	681	234	242	443	923	361	1915	557	142	356	300	621	229	489	1301	345	370	450	164	423	332	311	323	374	414	191	421	347	258
118	19.7	56	337	108	60	13384	380	118	107	159	115	50	135	92	64	1889	936	103	811	1225	496	507	444	257	562	396	1374	213	265	356	343	292	134	567	649	191	387	147	235	304	306	278	363	403	990	156	404	201	258
119	19.8	92	121	128	99	5852	97	108	108	112	71	55	693	274	144	1478	2514	57	1396	8818	313	600	511	824	382	424	2175	250	320	506	719	564	167	433	608	670	371	278	144	379	747	293	91	490	439	146	425	202	334
120	19.9	65	136	108	94	4488	145	165	89	126	71	79	562	499	885	1029	1207	106	2187	15397	872	286	677	379	692	287	1261	459	176	443	702	570	152	433	392	224	412	268	273	338	422	299	707	401	584	161	487	131	651
121	20	62	2032	817	75	175	1020	574	101	301	78	51	1492	178	1206	596	826	775	927	12285	726	321	464	401	771	319	4820	562	467	465	462	750	171	311	491	389	326	581	190	412	247	319	231	248	628	160	379	194	354
122	20.1	827	1324	1773	181	483	1185	157	222	130	83	46	2060	359	1460	441	946	756	1804	5919	752	505	329	562	418	231	5430	464	488	329	460	731	275	280	791	504	292	1116	183	510	500	351	317	331	244	213	439	239	483
123	20.2	1187	1498	884	722	930	1683	149	96	107	91	38	4610	386	541	1088	888	611	2128	11277	892	323	395	715	377	462	5525	716	429	346	748	478	141	362	312	407	244	1001	121	469	428	301	229	438	380	173	436	336	347
124	20.3	2275	227	154	897	1192	1431	119	102	369	91	62	6645	951	988	506	328	464	1427	1781	814	371	333	516	202	401	4469	328	465	281	208	516	116	387	406	321	219	372	187	599	249	340	280	240	328	367	250	226	528
125	20.4	10042	48	100	100	986	1554	171	504	1394	274	51	6786	346	1964	1884	315	1100	1212	15736	486	387	244	347	881	454	1668	388	415	248	171	309	153	338	754	222	338	370	180	411	294	312	287	256	621	167	779	125	411
126	20.5	2608	80	1305	111	1391	1195	378	2374	687	821	66	7177	195	188	975	798	915	908	3880	802	468	635	470	1761	356	884	438	236	263	306	373	221	386	638	483	514	417	195	556	671	438	315	316	457	218	466	184	864
127	20.6	193	67	2434	101	6854	1718	78	7505	169	426	93	6914	667	92	90	2030	612	764	11001	815	426	193	385	1862	373	4900	393	253	514	221	472	286	290	582	380	349	254	196	254	288	278	265	232	367	192	458	219	706
128	20.7	58	497	920	87	15855	1894	107	8250	386	79	33	7357	476	282	1325	800	750	731	9499	1269	475	318	463	1461	433	2503	403	137	399	480	483	763	296	500	336	373	408	189	304	184	425	225	388	321	162	483	293	264
129	20.8	73	3521	97	96	5401	1742	148	1442	297	63	33	4991	718	238	276	1361	644	124	3751	837	420	473	299	1389	334	2379	400	254	414	289	624	447	333	394	194	505	659	191	391	236	316	269	245	340	338	391	646	336
130	20.9	1039	3388	107	118	668	1151	108	1357	122	80	45	2007	1228	340	690	106	84	144	7507	768	275	446	399	1329	211	1506	433	278	314	288	740	307	408	853	244	446	347	164	417	352	379	223	342	536	155	364	550	263
131	21	646	6285	1088	293	484	870	95	101	87	89	195	1386	109	675	1063	174	77	517	13678	384	412	391	344	1383	412	2028	300	234	379	443	696	283	352	751	419	438	350	171	376	489	434	315	610	336	175	550	407	351
132	21.1	1194	3783	1141	1554	1844	854	81	117	112	83	1248	2788	154	305	462	664	88	1104	10750	206	448	544	332	1334	386	2375	375	271	290	511	525	253	291	804	379	379	480	178	379	311	290	129	417	501	313	512	163	162
133	21.2	296	279	1584	1098	14730	981	952	135	87	301	192	3689	255	163	442	624	111	270	10831	245	315	273	335	1211	339	4639	601	150	284	266	541	541	288	403	356	356	511	111	391	361	223	267	363	348	203	719	160	355
134	21.3	65	1136	234	2175	7351	629	1412	142	377	918	99	7912	690	63	151	1464	238	448	14124	132	297	236	400	1031	345	1941	531	155	264	246	852	625	392	985	449	405	330	244	394	320	305	273	266	488	143	656	151	222
135	21.4	66	361	80	2413	2651	873	302	234	1249	877	52	6959	1353	73	1878	3430	149	211	3859	470	478	264	589	1158	363	6871	497	237	412	166	577	564	243	639	480	566	98	140	458	322	380	526	453	383	169	610	141	448
136	21.5	79	87	97	445	18170	1392	813	98	151	1027	78	1463	79	66	1095	3020	321	399	17099	156	226	311	324	1060	317	7318	162	213	223	346	673	505	206	715	426	365	209	80	440	168	238	157	360	224	190	452	165	253
137	21.6	68	71	630	74	15491	291	205	124	561	635	26	1113	84	889	91	1063	722	543	9693	585	205	335	450	2013	498	3205	750	356	114	424	645	287	299	548	289	417	127	193	223	231	338	227	395	195	169	253	146	246
138	21.7	90	72	1662	70	21753	463	102	124	1750	64	60	1500	149	86	64	187	490	847	8688	946	389	641	417	2758	436	1240	600	297	197	676	687	626	367	452	588	288	353	240	444	352	256	162	409	249	151	367	133	728
139	21.8	69	431	2734	86	22661	144	174	147	1744	108	63	492	664	154	246	139	138	2046	16507	244	442	475	310	2362	467	4439	447	342	250	401	394	519	421	771	253	322	230	184	350	310	197	159	989	375	152	260	144	655
140	21.9	136	2224	482	182	10958	284	302	119	221	97	63	145	118	892	113	1450	471	1133	11148	448	331	622	255	1241	418	3128	483	168	353	269	925	665	561	1260	175	249	623	188	396	282	280	324	348	465	139	809	136	241
141	22	93	1444	742	53	6910	284	483	101	761	84	78	398	96	3556	687	1949	356	1043	12204	82	422	369	378	1246	456	577	406	270	487	378	400	648	286	533	251	323	318	190	523	393	308	291	302	596	145	825	183	198
142	22.1	81	309	844	66	20317	152	356	131	177	82	83	1622	436	3256	588	452	208	310	10166	87	435	296	420	1112	473	1701	587	233	357	437	603	406	351	273	447	377	365	156	550	401	283	304	481	478	407	1724	200	330
143	22.2	99	139	273	370	16545	71	139	124	709	93	1806	263	1137	718	1081	525	440	1657	10691	87	346	347	713	997	426	2675	755	287	185	222	612	535	299	487	205	519	873	183	546	268	525	270	356	327	362	561	694	395
144	22.3	79	1703	1119	131	12205	87	112	129	4824	363	933	421	2332	100	1459	389	143	475	14589	1012	316	380	352	1724	541	8735	259	163	272	365	437	648	265	525	107	457	605	141	500	304	449	162	223	394	177	422	236	373
145	22.4	395	157	766	254	10077	82	838	111	6371	598	863	389	2349	1206	78	1522	178	1289	17577	617	518	415	626	1427	402	5560	366	215	466	277	411	863	240	684	496	519	436	116	390	597	687	329	264	372	192	226	129	508
146	22.5	74	127	87	108	4816	439	654	749	5542	705	1031	238	730	1172	325	4014	5811	448	9608	1533	505	501	458	967	114	5343	477	147	352	258	457	1033	315	556	489	419	198	106	836	476	298	293	301	492	164	297	134	379
147	22.6	64	112	164	100	1815	1730	313	510	2400	6693	253	99	68	211	2125	6179	9702	1100	15252	3021	560	622	659	768	223	4036	287	201	323	421	411	971	582	268	376	435	129	126	763	241	435	127	286	308	266	292	111	470
148	22.7	68	125	182	571	15516	1306	136	4481	771	11823	105	92	128	82	8332	4231	12614	440	16422	5230	341	461	504	1368	288	3051	541	247	414	328	263	578	252	372	417	537	372	122	282	698	516	132	211	297	278	413	150	740
149	22.8	85	130	110	1257	22546	478	101	232	5733	12234	103	169	1587	78	17992	3337	14452	1711	11180	5211	478	307	581	1823	484	1279	395	260	276	349	299	896	207	282	458	420	211	146	541	605	486	189	211	375	142	747	209	449
150	22.9	101	1614	995	1842	21058	169	100	312	6747	14484	92	101	262	157	4758	4555	13636	4411	15677	6932	405	397	395	705	334	4185	762	262	178	685	360	795	290	456	386	397	389	317	648	403	326	307	398	279	230	360	636	186
151	23	334	2180	1270	1704	11725	166	129	73	7449	12176	593	89	132	142	7125	5694	14938	5946	9126	6663	453	573	641	925	264	2160	615	158	375	546	478	812	328	498	293	480	484	131	378	856	441	158	420	513	164	274	385	159
152	23.1	15985	773	698	592	18929	97	101	86	9088	5538	1089	444	607	788	7964	5093	17946	1088	18139	6086	662	261	1625	1842	521	3445	682	176	197	679	611	1006	448	817	420	389	441	168	339	390	562	318	287	674	305	240	500	116
153	23.2	19830	129	1048	407	11536	112	188	86	9968	1010	899	567	2012	544	13759	5935	9149	359	17676	7265	484	476	460	1577	421	1960	295	346	413	665	676	867	532	337	469	329	486	203	371	483	422	240	325	223	540	380	199	170
154	23.3	16686	118	1918	1473	22495	110	837	79	4336	242	71	1364	899	82	3576	4026	16664	135	17595	7285	449	479	479	1685	322	3295	588	130	306	848	242	809	389	387	163	513	424	185	320	462	355	317	390	321	244	502	196	183
155	23.4	15984	106	2047	1588	19015	178	1424	218	1306	539	57	84	367	94	596	1308	12608	423	15601	2317	497	231	508	1232	391	3655	523	137	198	724	524	768	329	395	627	453	647	342	327	370	401	117	300	376	321	391	150	281
156	23.5	17765	721	1041	116	10153	220	1949	3006	1152	443	74	157	2353	43	119	4574	3854	1341	16599	6015	311	266	300	1119	617	3112	360	276	396	327	538	809	216	579	328	401	291	267	579	350	195	245	367	357	434	419	126	165
157	23.6	9532	466	1895	116	19724	526	430	317	170	2696	94	62	1097	209	192	2466	1349	1432	13800	4242	256	591	455	1186	419	3358	644	175	308	295	380	882	344	825	283	273	165	139	471	337	257	211	302	369	287	276	125	404
158	23.7	769	927	2912	192	12164	363	155	505	167	13221	422	91	1076	52	1352	4843	743	590	14979	4543	310	316	2152	1499	345	6261	809	382	377	439	546	641	351	525	656	253	255	214	423	327	344	216	484	527	163	505	165	358
159	23.8	487	1906	1281	516	10544	264	170	312	565	3194	709	68	1556	373	888	3455	172	245	17303	2650	573	362	851	1110	404	2662	554	249	305	340	394	671	312	461	278	320	611	239	389	307	230	151	288	441	170	393	214	475
160	23.9	196	1512	1434	88	2008	970	408	11864	210	533	1899	1774	372	179	1197	3369	410	460	16679	6674	1860	263	593	2362	466	3129	627	228	339	289	468	465	272	262	245	269	2120	149	348	405	280	208	201	432	227	291	252	480
161	24	2546	1666	1518	713	1684	1819	882	9185	1020	2100	1595	1492	2851	1235	712	3128	854	1193	2440	6150	554	277	459	1426	336	2556	534	280	242	593	361	437	386	237	421	338	653	418	206	395	252	224	349	351	119	352	86	171
162	0.1	9980	3076	3340	2141	2059	6170	2354	1054	6818	7362	3180	1900	2204	2337	1412	5448	1393	1934	929	5826	319	352	383	2790	370	1430	642	218	300	425	88	152	97	238	291	226	584	145	321	400	196	184	213	384	147	286	185	240
163	0.2	7857	5373	2305	6106	629	6401	4566	1107	4552	8276	1736	768	727	1597	388	4653	1573	1718	1588	3755	548	433	452	2280	320	2997	325	1135	417	447	184	166	150	249	101	200	728	128	598	302	359	133	323	412	85	208	350	169
164	0.3	9628	7834	3174	7223	1104	7695	7889	1127	6228	6662	2429	466	224	1989	830	2838	568	1744	1556	2005	441	552	327	2248	479	873	396	157	227	177	260	169	231	274	274	208	372	144	428	221	275	106	203	212	91	271	156	121
165	0.4	9428	4485	1144	6792	4748	5797	3426	1106	5728	5049	4624	1245	123	1502	1468	2053	119	1356	926	4722	547	252	255	2560	394	10095	334	245	223	268	360	111	232	167	200	248	278	86	432	217	249	176	200	297	89	218	86	234
166	0.5	5807	1400	1167	6953	5368	1443	2839	967	5223	8596	3709	830	170	1073	1118	2077	376	1186	1527	1738	310	405	376	1957	321	4126	171	886	193	407	556	98	167	291	240	309	450	119	382	162	332	78	322	466	104	238	108	257
167	0.6	727	1345	1218	6369	3526	712	1506	1104	2298	5058	1685	910	284	2175	367	2093	140	1298	1538	1169	394	156	227	2399	346	1318	307	2903	164	459	522	140	159	337	349	367	801	142	174	155	233	263	246	273	123	223	117	255
168	0.7	489	759	894	7063	4048	621	379	1172	947	1777	599	71	238	2721	311	1944	334	717	1259	884	486	314	462	2267	690	8201	383	1824	150	283	622	97	171	173	259	347	561	185	166	313	236	110	201	158	119	298	177	206
169	0.8	70	244	1389	7723	4182	87	174	582	229	1892	435	81	240	2351	79	2056	171	305	1693	1105	501	355	534	1779	310	6876	241	1180	269	359	422	117	151	220	205	343	388	163	172	333	283	105	200	416	128	139	149	386
170	0.9	86	82	815	6593	3374	122	190	702	304	2418	444	89	324	1393	53	1550	170	908	1712	1555	407	595	344	1411	386	2055	557	744	215	546	419	80	193	201	160	347	713	250	160	238	217	124	286	188	99	236	120	419
171	1	104	282	1213	7115	2727	199	234	49	512	1857	78	88	214	893	73	1232	553	1243	2032	977	479	550	381	1798	388	2989	539	1381	120	248	563	70	232	210	316	311	302	165	264	248	248	159	259	358	139	256	192	293
172	1.1	133	81	1064	7553	3509	98	136	79	108	1698	54	58	141	1485	96	1451	946	74	1636	1417	299	297	408	1343	404	8137	239	2158	142	246	324	96	215	247	408	248	629	95	463	138	268	381	119	284	128	334	498	278
173	1.2	210	120	1112	7007	3127	216	78	90	153	1455	307	232	261	542	84	925	852	73	1575	1066	507	592	469	1882	394	6811	564	1045	213	825	328	113	428	276	292	288	2303	114	324	183	154	428	376	224	140	483	330	335
174	1.3	91	75	920	7569	2883	157	122	108	202	1532	843	125	63	1142	93	1175	761	74	540	266	621	401	329	1988	365	2133	402	725	205	321	317	83	165	350	115	193	386	100	335	306	253	341	297	253	131	337	229	193
175	1.4	89	43	1076	8410	3370	313	181	92	102	1043	1267	109	43	883	82	1453	645	75	145	89	535	542	263	2330	519	3212	450	486	131	200	297	158	102	309	272	315	423	160	397	225	226	231	257	200	129	422	225	292
176	1.5	81	83	612	3586	2156	440	314	1036	108	86	431	205	84	315	245	392	317	112	97	83	723	129	480	1486	418	4160	400	643	296	121	377	154	208	383	203	782	560	200	195	236	164	205	252	343	170	286	225	187
177	1.6	80	106	823	6457	1691	321	87	1175	111	486	160	89	139	406	83	1127	389	78	53	75	137	133	421	1898	331	6699	486	569	146	297	429	103	122	365	214	336	414	124	308	228	133	160	356	315	190	299	146	242
178	1.7	92	59	1129	5972	1652	77	46	845	167	1441	343	131	266	345	97	293	758	107	88	71	560	163	467	1551	359	3757	512	451	135	308	519	144	152	331	380	288	415	115	300	317	320	186	302	176	192	195	672	189
179	1.8	122	61	1119	5563	1005	165	87	799	112	1384	146	643	247	434	334	158	112	104	158	81	534	362	1818	987	334	2470	317	490	130	150	420	54	142	582	202	277	328	209	469	236	177	75	209	272	78	254	331	252
180	1.9	105	55	278	7993	792	128	303	387	224	1653	129	550	306	699	343	143	66	89	72	126	270	308	670	1260	368	829	561	707	218	306	397	101	285	156	238	220	602	173	368	201	253	219	220	295	123	252	218	253
181	2	563	42	278	6614	1094	71	188	72	159	1090	146	1223	343	1033	94	271	77	110	85	232	437	587	227	2205	333	3059	372	790	229	402	413	175	365	718	273	207	590	168	188	288	297	165	242	193	98	327	158	732
182	2.1	601	168	595	8646	866	245	304	73	131	1002	64	974	507	416	78	286	96	117	136	242	503	325	249	2150	388	445	631	166	188	261	358	282	209	900	233	187	534	119	187	301	243	199	271	243	77	243	342	134
183	2.2	434	364	743	7498	941	104	1256	67	297	1428	111	1223	182	691	68	84	102	117	96	562	654	322	6120	1708	257	6771	427	324	305	662	370	213	305	448	365	166	273	235	187	231	185	204	170	380	124	210	124	259
184	2.3	80	110	1142	1949	687	96	265	84	143	1110	84	269	130	642	57	79	108	97	73	89	515	521	3519	2184	233	9685	745	397	211	392	417	123	340	555	312	260	543	150	157	198	174	119	349	282	160	247	190	208
185	2.4	88	50	851	719	867	58	106	95	538	1146	59	338	111	592	289	100	106	75	76	75	366	95	665	2124	463	2608	147	238	103	489	201	127	126	591	235	419	314	97	273	188	169	137	288	199	134	347	649	431
186	2.5	66	81	81	95	931	121	130	68	452	898	58	700	143	472	511	55	58	57	87	61	334	212	826	1669	213	2657	146	293	172	228	765	222	289	403	176	325	374	211	605	266	281	219	372	197	143	463	428	385
187	2.6	51	73	281	285	1336	80	172	84	950	451	73	530	100	375	588	61	81	81	61	99	545	314	730	1650	216	2865	160	390	158	307	206	154	172	263	109	446	432	191	398	264	183	145	265	271	123	394	150	402
188	2.7	81	51	69	104	1074	62	127	61	88	946	83	85	75	304	33	51	58	73	64	73	588	251	320	1638	196	3289	439	412	281	189	244	123	112	196	190	491	606	169	300	240	221	230	374	187	162	342	166	557
189	2.8	79	51	75	85	949	66	89	114	109	1089	56	113	86	240	83	57	96	80	70	52	453	164	341	1426	357	1839	436	269	79	265	272	123	188	347	303	347	319	189	496	300	111	778	209	323	99	322	254	365
190	2.9	71	69	122	137	823	74	128	65	108	1519	42	54	129	335	54	82	125	77	67	97	550	376	466	1662	329	3226	579	201	202	271	378	147	251	384	145	129	188	127	465	282	247	635	221	306	123	259	183	701
191	3	92	114	109	142	268	81	192	76	120	958	59	34	174	49	75	59	237	79	63	125	503	393	680	848	373	4979	372	203	357	347	499	334	123	386	203	288	456	142	577	165	200	382	486	291	236	382	133	709
192	3.1	58	90	133	86	63	63	156	64	126	928	118	32	264	92	71	164	78	128	560	82	430	327	2087	838	552	442	512	455	236	318	370	163	190	374	114	274	304	163	540	250	213	142	341	270	90	292	115	1472
193	3.2	64	86	206	75	88	67	102	154	120	849	95	28	242	41	53	70	89	67	583	83	393	347	560	1127	609	3837	552	487	163	466	365	138	173	352	336	472	297	174	157	140	277	333	239	253	95	541	195	1992
194	3.3	72	53	108	71	173	79	94	92	118	624	77	95	980	107	96	190	45	92	74	236	335	335	4863	1883	456	8592	517	240	169	260	535	120	207	404	160	358	221	173	141	398	271	129	177	305	163	287	149	857
195	3.4	68	107	107	92	62	103	115	222	161	1413	96	59	133	201	48	290	85	121	84	114	445	357	6458	1183	456	1092	531	117	187	110	477	95	360	484	343	239	501	236	365	252	305	186	201	300	107	263	428	468
196	3.5	76	70	286	168	82	103	56	109	176	833	141	56	101	250	56	320	114	64	84	782	392	302	2747	1104	478	276	272	274	196	417	423	151	232	339	220	244	544	284	333	334	285	369	390	261	109	355	146	534
197	3.6	90	126	288	931	87	171	286	187	554	733	89	79	66	43	27	78	76	71	100	593	743	326	627	1969	246	6745	434	433	242	310	305	182	172	439	283	257	324	157	179	226	341	393	459	229	121	369	178	539
198	3.7	116	110	876	1146	280	81	471	199	105	59	365	92	116	43	63	64	75	90	59	838	377	807	336	1924	643	6680	463	615	193	266	349	117	220	343	292	237	213	215	476	262	215	100	345	180	89	394	587	946
199	3.8	91	93	166	1122	505	265	945	102	271	233	515	130	50	47	78	56	214	81	54	1452	280	575	6256	2340	266	3012	769	466	214	301	230	162	365	293	312	304	545	98	227	299	163	148	314	169	91	462	243	644
200	3.9	74	103	160	921	1105	606	117	95	343	64	754	119	71	46	84	65	117	121	84	1020	418	246	2007	1499	175	11341	858	718	187	255	208	114	433	411	314	365	392	181	288	456	171	246	381	276	100	488	152	988
201	4	102	85	151	729	1365	3016	117	222	405	55	727	142	65	72	178	185	70	89	46	889	395	189	905	2231	497	3282	936	887	333	322	624	165	294	448	241	428	300	160	299	360	167	193	238	242	90	471	134	752
202	4.1	202	62	246	566	2286	1902	127	848	335	163	507	81	54	53	376	107	214	139	80	1323	261	336	4715	1677	412	1455	725	514	170	390	424	170	153	328	111	269	409	122	365	194	359	167	295	276	93	202	122	555
203	4.2	261	346	118	345	2617	1753	68	668	110	67	884	100	45	49	310	74	133	78	53	658	442	529	542	2021	311	3487	430	180	170	335	400	190	310	415	284	355	568	117	367	134	335	271	228	201	531	242	121	452
204	4.3	220	1087	119	96	4306	1421	72	447	212	46	920	87	42	90	77	124	84	1688	65	1174	285	396	418	1632	393	3588	498	192	95	173	326	98	312	282	314	322	256	167	664	281	352	295	295	269	226	502	136	355
205	4.4	63	1433	537	68	4321	508	92	66	207	84	1223	511	47	18	138	112	79	2394	90	281	424	178	8543	1287	241	2790	484	208	156	277	150	137	236	309	204	212	127	129	385	254	274	163	219	210	319	267	109	465
206	4.5	79	1213	1209	75	3992	98	59	167	275	92	1142	1073	151	8	655	103	77	1801	126	147	252	248	9667	1500	396	1298	490	235	293	420	361	135	283	423	260	309	182	167	267	243	135	181	218	194	194	303	131	945
207	4.6	62	1321	368	362	4906	91	403	94	150	106	773	541	119	82	880	91	131	2035	482	87	404	435	5263	1555	222	3041	262	830	216	384	158	144	108	386	226	196	206	145	231	883	408	124	205	241	106	223	137	407
208	4.7	52	1299	445	55	4673	101	194	86	136	271	376	290	203	76	1364	87	110	649	1131	92	310	286	4493	2193	356	4372	467	709	216	339	153	130	259	363	255	295	685	92	288	418	283	117	287	239	74	533	157	599
209	4.8	68	487	1294	68	1416	98	165	70	125	77	145	42	61	69	1168	119	99	71	1002	95	365	185	7589	1822	193	1699	655	410	192	464	716	131	318	378	260	242	678	75	428	415	169	142	232	464	81	242	209	413
210	4.9	120	1245	1579	101	550	106	121	62	99	68	69	49	76	69	612	102	158	120	1600	165	552	489	2654	3037	286	3243	572	638	195	257	194	170	317	515	363	178	524	125	283	359	132	166	310	233	70	436	360	282
211	5	352	1189	996	120	1166	293	123	132	102	66	109	210	102	51	386	300	313	600	2156	341	366	518	4940	2532	224	572	518	609	168	233	396	162	322	463	186	269	894	138	230	319	194	183	319	255	119	313	170	435
212	5.1	159	56	1015	87	567	1064	261	130	584	204	67	98	174	106	84	396	533	110	2205	142	520	561	7114	1926	511	6331	655	342	86	644	385	167	330	421	248	542	422	271	491	240	212	192	338	249	84	340	129	263
213	5.2	82	69	221	105	188	1778	83	82	105	81	72	76	231	237	113	687	122	64	365	342	695	224	6769	1636	253	2376	345	649	222	270	286	139	309	352	366	453	473	213	135	329	296	149	119	253	139	267	137	475
214	5.3	83	125	115	137	835	783	114	98	860	110	78	71	256	830	80	95	99	95	444	202	622	269	5578	1587	249	3898	312	461	283	344	234	140	191	297	486	107	349	154	151	284	212	124	195	253	130	347	142	372
215	5.4	95	123	86	109	1053	143	236	102	110	62	54	163	230	764	57	886	136	100	70	113	277	363	4157	1151	380	3247	213	444	168	409	239	152	124	478	267	164	208	116	217	487	171	141	259	268	257	152	127	625
216	5.5	125	113	78	90	690	89	206	231	431	93	90	170	529	353	42	1458	78	66	79	120	216	134	5422	1651	218	1796	357	589	167	197	319	200	305	489	135	190	144	238	153	210	181	178	362	263	53	206	360	300
217	5.6	194	98	109	119	261	98	554	115	480	111	65	87	533	333	96	1481	98	77	96	120	373	420	5199	1826	179	2280	365	648	234	225	268	144	155	459	155	310	341	168	216	235	148	173	274	205	124	129	337	1026
218	5.7	132	172	285	64	53	124	435	91	136	122	56	60	151	159	346	523	116	91	88	634	334	512	4872	1363	378	2876	339	726	212	146	520	145	146	496	384	253	541	100	282	172	273	138	314	279	114	343	199	677
219	5.8	208	517	333	110	51	101	129	68	94	73	60	79	134	50	338	666	93	95	49	168	353	237	3642	1328	284	3317	432	620	173	450	305	113	224	517	380	382	540	160	223	147	430	119	646	251	96	206	328	169
220	5.9	109	88	1311	109	91	94	123	73	350	82	116	76	91	88	98	802	95	92	451	212	393	454	4896	1165	289	1060	387	640	80	254	466	99	243	392	235	269	545	159	290	307	256	151	241	245	156	147	137	266
221	6	118	75	477	40	75	103	145	305	114	83	82	66	83	68	54	69	171	100	344	168	571	269	6638	1866	389	299	404	790	86	358	491	107	302	397	492	287	743	125	407	327	168	167	287	248	155	169	143	918
222	6.1	466	83	338	84	74	148	78	101	116	64	88	56	108	139	65	55	135	776	86	149	458	570	4342	2061	362	5738	655	909	100	232	372	96	236	463	240	739	885	229	401	277	178	117	276	401	149	216	125	510
223	6.2	905	58	433	108	238	253	90	56	131	116	136	462	64	571	77	65	119	1943	961	153	493	255	1991	1743	394	3266	208	544	81	478	367	114	242	330	346	347	157	219	348	252	150	179	364	466	152	511	109	337
224	6.3	832	66	200	354	211	164	83	60	120	76	94	855	65	1391	62	44	528	1095	750	138	387	169	2390	2041	289	2912	618	479	161	294	272	124	202	419	420	227	105	179	156	145	206	202	310	364	102	276	276	486
225	6.4	156	117	83	507	65	169	64	90	90	156	46	722	433	596	84	67	268	1124	98	83	318	230	4630	1615	422	3064	633	253	63	257	380	156	154	258	250	257	395	259	220	296	156	104	316	250	220	294	263	364
226	6.5	193	54	261	94	73	168	77	77	232	549	72	392	1010	177	33	65	111	1109	95	266	394	405	5462	947	362	1954	1056	627	92	357	161	123	236	368	291	215	670	271	182	534	194	145	299	400	95	265	175	219
227	6.6	188	57	874	103	108	293	63	74	118	1011	124	380	787	49	64	68	689	100	99	144	268	191	3073	1254	481	2311	853	1087	60	321	231	123	317	419	314	185	284	226	130	321	104	153	224	208	87	164	533	598
228	6.7	71	53	122	68	79	320	389	49	144	73	403	434	1387	314	74	65	240	946	73	112	383	197	1711	856	377	2282	534	795	325	251	366	94	337	288	230	186	384	290	307	240	217	416	287	229	109	192	156	1298
229	6.8	71	92	81	80	87	436	157	61	118	77	229	65	158	286	51	35	111	1059	74	82	378	206	5500	1129	603	2329	195	889	260	222	716	115	314	455	172	216	715	237	180	334	121	330	201	257	133	655	102	405
230	6.9	39	70	65	82	161	821	99	318	128	83	62	81	55	266	46	65	131	85	131	118	347	226	8699	1579	307	4287	530	977	272	176	285	112	459	786	525	565	578	709	197	325	90	136	263	284	118	306	113	398
231	7	48	58	72	85	44	1590	199	77	121	65	237	91	52	257	69	75	147	116	111	547	337	267	6090	1326	395	2376	341	1037	441	341	996	208	176	509	413	389	560	155	367	416	194	178	352	405	86	478	148	448
232	7.1	76	177	98	118	89	2125	161	152	143	69	90	80	74	115	132	85	173	107	93	815	410	352	4074	1889	215	2287	394	956	300	602	499	304	205	436	159	271	716	110	256	368	155	121	187	297	191	219	110	631
233	7.2	111	1954	97	82	52	744	76	93	329	72	73	68	56	110	111	356	200	45	90	1244	325	530	3524	1452	238	4144	589	823	101	331	404	336	244	365	119	604	455	149	271	305	122	190	158	87	610	104	164	550
234	7.3	117	1185	57	96	49	71	85	86	670	84	87	51	211	102	101	80	182	98	102	94	294	532	5232	1411	247	1193	299	897	140	381	726	183	143	486	197	406	796	196	223	257	133	236	226	292	232	106	273	1306
235	7.4	95	805	72	110	93	237	101	224	318	117	79	47	416	97	72	90	1018	82	69	91	250	278	458	1492	398	2440	362	800	210	231	567	144	147	396	111	352	319	190	189	247	137	83	211	369	104	299	171	610
236	7.5	55	246	106	108	86	241	140	93	130	94	80	115	581	122	563	175	1960	67	71	62	373	276	197	1942	197	2342	542	399	290	224	470	122	300	339	96	205	171	245	217	265	105	210	269	269	158	230	176	598
237	7.6	51	69	94	108	77	98	80	109	271	320	62	88	69	90	303	114	612	76	72	76	443	748	271	1645	609	1909	731	1698	202	215	785	126	231	300	115	224	706	165	164	332	121	214	465	238	244	477	134	349
238	7.7	145	146	106	143	279	58	51	90	187	83	89	215	89	128	191	51	937	31	131	84	276	271	1559	1574	222	3058	400	922	180	432	458	164	285	365	128	347	273	212	182	325	248	179	311	374	219	296	388	356
239	7.8	160	121	89	105	51	55	78	121	161	91	217	571	59	83	749	169	503	85	49	69	308	120	493	1441	220	2838	482	1475	305	286	215	118	186	405	144	351	358	150	138	206	641	389	261	171	136	297	113	607
240	7.9	116	87	81	115	97	64	52	82	138	82	115	1013	182	57	263	58	946	71	100	58	636	174	562	2103	246	4445	441	1653	157	133	445	115	197	242	315	348	460	215	369	127	127	410	350	287	135	218	119	327
241	8	133	522	315	93	128	97	111	112	291	63	238	774	241	92	108	63	1064	90	70	26	264	236	254	1691	170	1652	507	1090	214	343	551	133	237	355	238	313	300	108	194	390	203	85	264	328	126	247	139	561
242	8.1	123	318	1450	97	213	68	87	570	491	78	1211	245	1113	87	66	47	423	55	149	67	310	468	382	2354	588	1071	474	743	217	223	298	111	201	366	293	417	683	322	188	383	134	248	282	332	111	244	443	424
243	8.2	76	397	1180	89	65	51	171	227	244	70	1180	190	936	85	51	80	136	55	64	32	467	434	169	2106	240	1930	610	911	226	304	291	232	157	419	206	288	575	132	244	564	203	245	264	219	98	464	410	421
244	8.3	53	846	329	102	200	84	55	1056	133	94	950	1160	301	79	70	94	116	50	51	311	193	230	213	1165	290	4906	642	451	111	227	222	279	179	415	197	189	427	263	341	181	203	254	273	283	106	141	98	418
245	8.4	56	156	136	92	95	75	35	458	270	65	231	692	67	71	77	332	112	63	70	143	294	215	441	1380	227	1277	540	408	253	375	636	198	257	437	150	322	1327	255	144	244	422	278	462	171	109	140	158	513
246	8.5	65	128	76	56	66	95	46	73	125	426	101	85	79	111	156	140	122	60	699	84	425	267	373	1053	348	2942	435	722	297	178	678	104	321	395	469	569	695	166	277	361	784	222	383	103	101	394	159	1173
247	8.6	57	113	99	75	77	50	79	42	106	759	133	124	134	242	494	210	208	76	332	138	351	318	353	902	357	3120	427	420	197	313	159	95	200	568	185	243	362	149	219	289	446	185	360	207	295	206	96	962
248	8.7	202	121	99	87	71	63	398	83	271	908	66	63	165	1039	130	57	65	74	89	112	405	563	462	2317	271	1659	427	971	180	238	398	110	245	629	276	323	442	144	166	233	130	276	356	287	260	133	106	404
249	8.8	82	82	57	64	82	25	214	94	194	1571	96	76	209	1303	44	89	136	1278	960	92	373	606	658	1437	277	742	395	471	312	282	123	125	218	285	354	407	527	122	183	488	187	129	308	378	266	336	115	703
250	8.9	59	98	353	86	205	89	501	91	344	269	53	123	212	478	62	69	100	2098	780	87	536	148	362	1286	217	7164	704	395	453	316	100	132	218	254	405	242	299	113	223	271	508	105	333	214	501	639	110	527
251	9	421	93	514	70	47	63	1068	86	103	84	58	273	69	311	218	163	155	2993	838	830	396	347	168	1438	189	1654	574	654	213	428	615	96	157	628	778	467	608	204	226	199	281	95	257	346	632	741	179	401
252	9.1	133	300	321	83	46	58	598	124	101	57	61	149	30	105	91	472	226	1361	1421	1075	509	180	224	821	237	4068	894	1097	279	328	421	136	349	379	153	121	480	99	213	71	125	247	155	378	296	512	165	630
253	9.2	49	1549	515	138	52	83	1216	106	82	97	102	148	304	65	176	172	296	685	112	463	509	379	186	1592	326	3084	702	248	201	406	434	130	193	294	188	169	1991	104	161	303	379	347	281	381	441	538	144	859
254	9.3	61	1344	63	203	84	56	1326	306	119	72	57	66	761	45	56	597	236	413	537	1247	172	405	586	1316	453	2328	634	98	223	268	299	169	529	441	164	209	1548	111	186	269	216	181	351	355	1754	262	108	605
255	9.4	64	1040	443	442	53	84	542	118	120	63	56	108	903	68	73	350	153	168	81	298	255	119	182	1798	762	3598	270	741	102	567	319	118	148	460	241	299	590	85	248	204	255	191	469	362	632	303	159	660
256	9.5	43	920	45	180	105	50	76	90	140	267	60	65	508	37	73	124	145	107	85	68	401	341	739	2144	1311	2135	353	1096	107	513	443	116	196	403	177	174	1448	193	179	340	636	342	442	251	167	399	168	650
257	9.6	50	337	88	72	62	159	88	84	127	42	109	156	84	63	62	60	465	138	73	101	285	454	250	1430	424	1819	624	911	264	535	356	120	315	628	179	357	779	114	306	397	431	143	181	201	238	372	158	532
258	9.7	53	605	75	59	93	100	75	137	113	52	119	225	107	60	64	75	204	82	63	79	404	182	501	1393	251	8038	459	697	399	412	495	149	232	403	489	346	706	127	362	308	413	231	239	373	239	249	561	713
259	9.8	43	115	51	74	75	74	95	318	113	71	47	150	104	80	54	69	162	74	95	78	580	382	240	1240	311	1314	616	757	293	133	451	276	185	389	88	473	682	115	238	190	337	60	313	431	239	366	161	361
260	9.9	52	223	62	44	67	53	67	90	93	70	89	126	238	210	156	78	102	87	86	413	433	251	1532	2272	269	2820	750	661	278	478	498	178	560	507	130	299	632	176	173	227	261	146	317	137	249	356	155	241
261	10	51	223	51	86	246	60	72	97	117	75	457	378	382	231	74	68	57	469	55	96	397	489	476	2236	401	1407	619	667	141	218	621	145	380	557	92	308	673	318	155	500	155	172	253	346	191	193	146	246
262	10.1	180	79	38	71	89	59	178	85	168	278	308	192	536	497	63	57	103	153	61	115	392	561	231	1675	322	2195	408	499	185	351	534	206	258	393	86	241	692	146	192	198	360	166	357	230	216	361	164	350
263	10.2	48	48	785	166	79	139	105	111	99	66	742	80	175	688	66	69	87	164	142	126	437	276	382	2375	502	2312	502	266	167	228	483	412	220	361	64	212	1020	136	227	210	442	233	429	298	193	260	826	394
264	10.3	78	42	94	102	67	275	141	73	106	84	1384	107	76	1165	69	88	76	70	307	521	138	614	435	1952	468	3246	495	571	79	405	425	281	157	556	222	435	320	128	366	337	216	366	325	320	370	235	113	537
265	10.4	92	81	182	239	88	117	346	104	227	147	1137	118	114	199	391	170	149	150	90	197	488	293	507	1922	210	3130	366	1018	318	358	502	178	137	392	251	236	1668	122	232	329	227	273	425	120	252	360	244	382
266	10.5	172	524	134	288	115	75	74	161	76	66	392	733	78	103	771	78	155	607	517	86	256	480	313	1050	435	983	744	340	340	216	687	156	306	389	209	673	684	152	268	389	312	257	359	349	188	251	1076	495
267	10.6	141	895	981	122	81	104	123	483	118	100	185	731	44	46	83	292	113	1001	1251	115	417	463	714	2746	1693	4959	580	570	255	336	482	148	205	471	169	406	1240	182	236	216	296	345	386	309	176	327	346	285
268	10.7	119	86	139	126	59	85	70	125	123	73	90	410	65	84	66	125	99	309	254	2074	328	507	464	1236	1367	1479	328	377	55	264	297	198	191	346	282	300	1512	232	185	309	505	110	308	288	301	270	168	300
269	10.8	84	75	514	514	481	124	85	80	101	60	82	35	965	79	73	97	262	1030	109	718	378	531	303	2173	582	2148	408	683	160	163	434	213	346	585	361	556	1442	188	217	245	506	179	463	278	230	337	134	464
270	10.9	132	95	867	376	71	77	104	90	269	67	359	87	52	75	52	178	104	1145	369	101	286	532	413	1793	182	3375	267	234	144	266	186	179	466	574	240	261	445	139	155	181	261	297	183	410	346	264	172	401
271	11	78	928	96	683	87	94	241	98	460	177	156	70	88	65	47	419	181	142	569	106	365	191	1274	1384	349	1702	319	237	120	346	261	181	213	444	140	132	611	106	212	166	189	181	253	317	336	352	192	538
272	11.1	98	1473	109	537	57	103	287	164	667	60	138	59	384	89	40	385	103	85	350	98	459	433	445	1228	226	2097	419	110	170	329	344	182	303	300	118	199	305	77	299	261	163	217	339	317	284	228	184	741
273	11.2	230	1614	66	745	127	139	398	61	193	536	116	219	356	39	164	755	93	72	58	64	558	418	185	589	232	4529	410	169	101	285	355	98	180	244	165	206	330	145	203	239	218	247	260	212	186	157	193	1038
274	11.3	132	596	61	1148	69	75	911	197	106	987	97	150	85	98	37	437	153	74	253	145	292	280	1572	2277	404	2919	660	382	136	252	246	116	220	911	72	226	583	163	209	306	296	263	328	221	299	118	168	842
275	11.4	55	74	456	1203	67	30	62	84	127	286	79	252	115	174	79	417	178	90	204	108	430	223	1105	2266	290	2268	712	612	199	325	253	228	354	439	203	277	593	167	260	491	388	246	315	518	463	289	171	459
276	11.5	50	53	86	81	85	51	62	102	104	124	105	119	66	245	36	55	109	103	87	79	542	438	366	1732	205	2421	470	909	246	310	255	148	116	410	423	532	1202	209	208	142	260	135	378	281	235	383	161	713
277	11.6	66	109	93	71	73	67	76	97	114	84	65	153	332	62	126	127	171	117	85	306	282	153	106	1642	527	4340	641	646	327	223	226	141	396	319	569	153	593	175	191	300	200	465	295	453	245	373	227	574
278	11.7	32	150	70	91	83	331	95	127	106	66	61	186	103	963	54	75	879	679	69	803	465	285	412	2650	403	1750	209	524	408	369	257	182	340	472	372	440	613	111	255	279	188	244	337	239	218	155	179	453
279	11.8	65	540	69	62	78	152	63	106	94	307	264	148	202	1576	191	53	828	228	82	1410	362	532	437	2059	461	4234	245	205	279	409	257	135	273	514	203	397	708	166	225	329	418	602	290	206	183	231	121	727
280	11.9	79	92	584	185	119	201	47	165	243	58	483	126	189	1953	55	110	121	909	89	571	383	251	1738	2352	188	1728	399	135	211	390	325	512	223	398	231	457	524	93	187	226	305	459	369	205	225	270	433	370
281	12	75	96	268	71	109	49	69	141	123	171	271	371	75	2278	64	176	268	1277	94	386	376	296	550	1306	271	1089	585	367	111	508	347	432	154	736	105	282	309	119	115	318	288	384	374	317	132	186	203	368
282	12.1	63	72	150	41	64	55	67	117	127	44	78	1598	212	997	78	124	156	684	72	86	376	361	583	1105	240	3192	520	328	241	353	251	131	230	407	88	246	363	134	156	185	300	326	447	454	182	298	194	262
283	12.2	142	94	104	77	66	46	79	118	91	55	98	313	264	601	141	45	167	823	616	153	466	168	390	1532	363	2462	480	211	204	363	240	219	327	356	161	459	897	150	209	218	249	152	160	269	209	232	169	381
284	12.3	152	78	952	98	60	29	352	100	85	66	154	83	94	941	58	391	118	75	840	904	522	266	441	2685	366	4740	518	329	173	226	483	139	182	311	295	301	929	138	411	257	534	258	174	318	339	489	138	746
285	12.4	140	91	124	72	44	48	154	203	88	70	495	178	92	241	65	448	113	527	97	80	253	330	427	3143	265	7336	555	729	179	329	209	304	345	405	151	575	1248	128	191	188	345	487	162	632	254	411	143	983
286	12.5	94	63	119	74	48	39	268	200	52	53	454	134	401	67	98	709	89	84	123	147	355	411	482	1785	222	3148	416	533	249	266	393	237	195	297	242	200	1435	210	262	302	216	151	188	334	302	296	108	774
287	12.6	98	62	651	122	80	30	203	86	85	52	367	60	586	123	218	112	95	82	82	423	670	159	342	1833	275	3352	416	253	140	403	479	476	148	530	450	385	1344	150	240	224	176	178	156	465	234	559	221	444
288	12.7	124	42	82	77	59	42	128	67	89	52	531	54	177	88	65	219	81	91	242	225	298	136	442	2522	252	1727	414	365	169	169	232	526	166	1318	370	225	219	126	165	226	227	274	143	327	218	484	212	996
289	12.8	115	42	96	51	73	70	116	276	72	90	161	144	1073	76	68	149	81	57	96	678	305	422	635	1143	162	1480	587	227	135	448	325	460	402	472	394	426	148	103	172	303	299	445	161	293	318	206	130	801
290	12.9	77	50	86	114	83	34	127	808	363	64	296	459	90	30	71	263	202	61	71	512	295	324	520	1860	393	2837	573	326	297	365	329	382	240	687	294	443	145	127	165	206	155	377	191	348	164	179	138	951
291	13	78	115	144	61	62	103	107	93	272	77	81	539	74	68	54	111	99	64	124	1194	608	425	426	1411	300	2200	367	417	429	300	301	494	223	770	133	455	510	86	229	360	342	289	186	315	280	402	134	1002
292	13.1	70	678	314	171	85	82	79	94	382	82	122	654	187	61	45	521	90	94	77	371	310	267	460	2518	185	6561	396	455	273	228	384	574	142	581	308	215	461	106	248	307	274	330	205	354	130	246	130	318
293	13.2	75	1542	1197	73	110	103	221	61	125	69	81	349	381	39	181	201	507	50	108	61	342	366	440	1315	394	1520	387	318	199	349	335	542	476	395	336	313	310	112	115	121	305	285	260	252	262	177	125	628
294	13.3	121	97	562	266	68	139	173	1384	249	63	62	101	1062	226	48	207	750	44	96	57	326	146	534	2343	515	1481	734	394	112	419	340	421	438	390	203	229	209	188	153	489	184	344	173	171	332	396	377	766
295	13.4	98	76	96	315	89	69	67	564	207	62	93	164	111	104	58	88	617	82	77	51	384	182	454	1240	286	3919	425	335	255	308	290	377	136	514	176	300	341	277	230	271	280	605	139	430	426	276	251	714
296	13.5	147	59	92	91	258	37	67	113	75	88	71	172	123	58	211	46	128	579	169	282	441	390	312	1251	244	2598	268	407	128	355	563	432	155	405	209	402	1013	170	151	225	427	87	410	522	692	280	138	547
297	13.6	214	222	100	75	109	31	40	663	88	74	63	82	129	111	562	93	135	96	69	66	574	276	549	1959	365	957	413	271	178	185	321	259	131	425	221	386	352	187	318	460	314	165	633	479	323	300	143	566
298	13.7	338	35	66	74	214	66	84	104	471	66	108	82	360	73	461	73	107	110	91	136	587	422	444	1242	339	2977	457	161	319	373	312	251	222	402	271	305	762	189	461	224	323	193	684	182	396	389	184	837
299	13.8	60	175	102	76	64	52	93	208	166	83	144	88	422	39	60	96	116	151	94	166	323	517	2120	2169	241	7100	524	705	287	540	423	478	267	415	253	631	740	164	254	309	458	382	450	213	229	366	265	617
300	13.9	61	360	94	71	60	232	131	245	103	75	86	222	937	61	49	55	133	72	248	251	373	360	528	1611	275	2138	307	554	205	307	245	188	260	489	267	225	410	136	211	175	221	711	628	207	162	176	212	730
301	14	71	186	83	83	96	177	114	91	69	314	325	313	634	43	65	50	79	91	714	994	472	194	1330	1102	887	1434	572	464	124	263	326	192	282	774	456	562	434	104	253	204	473	605	289	251	151	231	228	550
302	14.1	92	102	1210	102	74	68	140	93	80	146	148	812	262	54	49	85	86	72	86	752	503	169	202	1280	2200	3458	729	70	159	246	235	243	260	1515	278	251	661	72	152	340	385	665	247	217	224	112	147	947
303	14.2	61	91	65	103	83	93	139	154	62	70	187	764	697	158	56	268	93	100	86	714	322	321	443	2080	553	2739	365	434	354	271	280	179	401	429	275	429	497	117	282	240	246	375	291	313	188	642	134	319
304	14.3	70	554	447	67	69	103	85	94	114	216	121	66	417	194	57	322	98	475	105	82	438	530	407	1804	301	1831	754	356	336	241	335	115	125	350	329	168	649	109	124	272	193	269	505	216	220	396	112	561
305	14.4	61	346	121	323	92	125	147	96	96	249	292	87	184	1470	115	634	87	175	77	251	284	455	506	1246	320	1261	593	391	151	327	502	221	333	667	250	383	408	106	219	375	228	380	340	276	197	297	276	164
306	14.5	73	135	72	404	51	89	488	90	93	557	156	82	273	2433	212	88	134	75	236	58	123	200	290	1486	376	2112	322	361	247	333	297	319	145	391	368	341	307	173	231	220	237	435	287	242	183	279	253	269
307	14.6	97	128	82	120	71	157	213	252	101	95	114	92	939	2033	116	62	280	93	587	55	229	275	494	1396	506	2776	506	449	266	353	467	425	215	687	371	422	446	203	281	287	171	357	139	118	810	193	401	923
308	14.7	129	188	83	72	151	295	122	97	87	84	284	237	373	1069	96	73	91	113	155	409	251	185	465	3853	234	1280	482	276	178	388	245	264	229	1169	183	305	838	185	335	247	201	331	186	299	1219	175	261	365
309	14.8	93	308	101	73	83	534	113	98	79	63	399	541	401	89	58	74	112	83	946	765	401	240	422	1449	1122	1496	421	92	80	358	485	217	252	552	217	413	1008	126	255	291	181	431	268	329	1150	239	174	408
310	14.9	80	150	92	63	78	277	80	103	79	71	58	70	280	42	92	110	187	350	67	874	271	567	175	1528	1566	3464	456	309	193	455	576	170	191	400	191	492	1369	234	230	289	128	367	121	146	1210	375	632	575
311	15	78	91	115	284	79	91	332	112	95	79	196	95	346	74	91	107	91	121	87	98	808	155	246	1742	850	4385	386	502	108	337	212	197	241	425	247	562	655	183	236	290	150	199	329	256	668	170	546	783
312	15.1	174	87	80	88	57	150	110	97	394	90	200	69	86	199	226	103	82	81	99	410	221	373	552	1530	501	623	518	433	223	398	146	170	338	1112	538	739	1168	153	301	252	247	485	166	310	229	118	144	325
313	15.2	102	57	831	226	54	148	101	90	115	66	574	84	159	109	200	114	91	412	130	139	335	442	527	3169	148	3726	362	402	150	470	275	143	446	563	265	407	860	161	314	324	411	248	138	260	216	365	161	746
314	15.3	100	88	215	127	34	96	95	76	321	67	380	91	338	60	79	231	87	172	89	77	288	233	2047	1524	223	2098	445	294	363	347	383	159	457	400	157	194	1206	124	245	594	356	225	172	220	142	270	188	810
315	15.4	74	71	152	118	47	135	66	100	112	89	215	93	232	83	137	227	169	534	99	148	501	521	1594	900	376	3312	431	327	190	447	498	136	389	382	136	126	1260	78	228	401	147	158	292	251	152	232	122	497
316	15.5	92	55	125	60	106	84	75	52	297	48	372	268	516	59	84	422	289	1239	93	478	434	245	584	2904	197	1510	543	373	193	480	218	567	392	182	292	471	1264	179	254	226	268	251	134	251	193	259	167	465
317	15.6	183	54	91	99	65	76	68	118	287	98	89	93	55	73	76	207	138	869	91	75	455	491	380	1368	284	1699	407	245	252	192	209	333	434	281	174	245	622	132	344	380	182	435	148	138	211	182	150	626
318	15.7	127	123	99	90	85	85	85	82	111	87	68	127	72	90	110	168	274	146	371	241	473	284	565	2205	374	2368	423	363	259	355	273	136	342	569	115	182	253	202	216	300	154	185	248	345	215	100	398	1096
319	15.8	75	316	124	78	92	128	93	80	332	58	62	252	129	50	159	128	100	124	169	866	406	406	416	1444	449	4428	585	320	102	321	371	113	190	1287	260	303	317	276	177	185	205	186	362	227	203	177	332	539
320	15.9	57	79	80	137	160	74	109	174	114	64	246	178	314	148	136	163	226	289	761	186	385	309	2070	2301	314	1662	901	221	137	222	220	201	156	1459	386	401	1023	231	173	458	265	645	433	304	658	363	337	713
321	16	201	617	455	972	796	390	425	411	648	558	1647	3156	2611	2168	1647	1849	1872	3078	3170	1041	761	589	5309	2699	1198	9032	652	306	244	842	496	401	800	798	381	453	696	184	188	555	302	295	345	343	439	215	329	482
322	16.1	1456	2905	1964	3135	982	1290	1207	970	1533	1305	1237	1858	2708	2135	1589	1300	1783	3549	1901	3105	482	1608	5035	2542	704	16380	495	349	237	356	672	380	566	786	259	643	821	204	140	388	284	292	247	617	652	203	414	836
323	16.2	832	1652	1203	1575	493	1402	2071	573	1000	1298	1034	1869	1594	1676	88	1526	1859	1323	2269	7610	561	672	1767	4111	252	11308	503	449	162	492	778	667	661	567	196	575	446	186	154	849	318	308	538	412	428	293	151	849
324	16.3	495	2840	2124	2371	1008	1040	1145	104	1088	850	2022	1319	4982	4266	508	1667	923	2244	2225	8138	452	717	1635	2234	513	8820	329	396	189	462	976	735	447	733	299	715	555	170	161	719	257	285	163	470	277	169	161	527
325	16.4	129	2820	1379	2508	615	575	1300	317	575	769	2108	694	3318	3397	98	3415	532	1182	5172	9270	481	679	1372	5042	292	12300	436	446	217	551	747	636	687	477	162	438	410	210	203	574	197	323	232	306	204	231	182	608
326	16.5	220	2499	1225	2447	317	597	2096	234	234	2763	1494	131	3212	5931	210	4371	483	1604	4872	9887	434	550	792	1405	297	5788	432	227	220	478	792	1087	747	1098	127	340	438	211	168	458	238	251	262	592	281	125	405	660
327	16.6	92	101	2380	2036	78	442	501	1059	403	16140	1875	109	2053	5274	1097	924	1128	3433	5535	10231	395	736	1418	3814	416	6372	483	539	196	749	992	743	575	645	220	595	494	172	225	289	347	365	223	227	452	230	307	719
328	16.7	362	2248	1509	4377	77	1165	98	11938	475	18281	832	1455	1154	7093	3684	3705	309	3557	8366	11574	378	957	1264	1446	327	6841	677	367	369	588	807	1147	341	619	214	543	564	140	155	238	235	240	153	278	364	125	127	590
329	16.8	93	1140	1296	10410	90	1452	129	16947	469	18604	477	3895	731	1823	8636	6513	163	8027	8380	10739	494	568	563	1475	553	11302	334	225	432	287	498	950	564	491	248	289	463	136	203	1128	160	202	226	245	449	147	400	578
330	16.9	92	938	1392	11153	55	80	295	695	133	16510	916	6916	1546	4913	12066	6138	88	6846	7567	10081	635	509	612	1318	291	9453	833	237	247	233	734	1071	303	475	184	207	290	188	154	594	344	318	204	264	436	145	170	711
331	17	232	3640	238	1734	472	102	609	220	432	16411	85	7886	282	5811	15023	6023	172	7893	7721	11369	471	519	611	1881	1298	6722	1130	476	438	482	987	925	531	706	131	491	454	183	220	1005	282	416	519	286	460	220	237	668
332	17.1	86	6815	1920	1198	732	184	863	879	559	3589	71	6124	1327	3722	14378	8085	276	9865	8250	12574	921	801	404	3863	1366	5066	434	455	145	495	665	1015	650	1093	158	289	506	156	290	386	253	394	520	231	529	204	292	884
333	17.2	195	10604	186	1433	573	288	1309	112	3177	1120	477	8380	593	7030	10264	6650	1383	10440	8037	9120	389	623	528	4539	317	2762	545	367	165	634	714	1067	606	938	191	447	442	138	233	233	235	293	274	299	332	77	236	484
334	17.3	1311	13755	1151	5805	1268	221	1528	204	7445	476	287	9315	811	5367	12973	5032	1407	11471	7444	3817	343	670	434	5424	575	4651	410	586	176	448	959	1031	444	707	189	583	1017	132	198	289	190	193	273	301	343	586	363	533
335	17.4	1017	13463	1117	16278	273	1133	1468	96	10780	152	440	7994	77	3853	17276	2585	1025	10952	4688	789	503	632	697	5075	305	3449	443	367	210	882	787	1463	472	590	433	598	954	162	232	1043	235	454	318	377	854	324	322	870
336	17.5	8892	13589	1824	14484	63	446	789	87	7443	444	66	9089	1798	5057	14898	879	388	11221	1012	1597	452	520	628	1451	398	4793	436	431	152	498	675	1623	240	383	282	536	467	69	188	432	120	426	243	277	300	623	102	547
337	17.6	15024	11951	707	8144	59	1104	571	141	972	130	48	9315	1531	7773	14044	3506	2209	5227	838	3486	389	984	580	1643	456	3519	321	313	153	440	644	1115	354	702	206	353	379	107	187	408	183	335	189	428	446	713	144	529
338	17.7	18061	7968	93	1311	78	4148	732	256	6768	102	73	7930	432	5241	12295	4983	792	8894	414	1032	441	738	1752	860	388	7213	513	466	183	398	863	764	425	349	208	347	318	91	222	458	334	127	269	447	241	1043	99	490
339	17.8	15169	1460	94	572	59	8130	1644	706	10994	82	492	7682	1058	6133	8191	5789	91	8245	443	864	560	867	2207	382	467	8218	429	272	151	424	637	1069	685	444	169	352	401	120	148	336	184	422	292	490	342	773	186	385
340	17.9	1711	7590	676	114	83	6604	67	254	9248	102	1267	6909	1179	4767	12888	5621	65	9553	104	563	402	433	1346	340	480	2097	614	337	160	500	576	1292	583	539	191	324	271	129	172	427	155	353	285	355	438	237	527	613
341	18	9827	7701	1149	104	382	10319	51	304	9663	555	121	6759	87	6145	7668	6164	110	6853	89	1035	493	797	663	1453	241	3165	718	421	183	480	731	1219	572	923	293	328	341	131	217	874	248	646	301	332	504	256	157	610
342	18.1	13986	14742	1584	96	639	5499	143	108	8692	161	99	7728	772	6835	12859	5367	66	6382	87	752	618	643	496	2771	249	2481	331	222	293	365	836	852	401	600	212	490	470	123	225	581	262	561	321	220	436	458	137	563
343	18.2	16018	1338	1436	109	115	8816	94	241	12488	75	369	8246	1820	6592	6720	5767	72	6296	111	1821	821	625	726	3432	396	6743	463	165	280	396	574	739	553	748	331	512	569	114	170	359	257	416	338	316	446	277	165	609
344	18.3	17559	2537	862	533	126	9249	162	550	8236	93	107	6785	406	5758	987	3653	52	8304	81	710	415	709	1673	1575	365	9402	433	268	333	593	718	802	306	750	340	496	669	111	216	445	250	339	380	459	438	1589	149	361
345	18.4	16391	597	113	451	97	7830	1322	111	7819	83	54	6474	158	7013	2092	1284	201	10039	2248	676	405	299	940	1321	1188	2129	412	569	220	595	407	865	303	703	459	411	275	92	284	438	275	316	533	506	317	190	174	958
346	18.5	15235	1309	1704	1397	81	8884	1053	108	11982	1115	66	7308	152	5601	3979	3319	97	6373	386	1575	596	376	984	1020	918	3241	381	568	139	523	486	938	527	603	307	498	469	111	209	371	223	373	629	379	686	294	162	736
347	18.6	16370	12260	470	757	854	7546	246	106	9016	1348	48	7998	63	7150	4686	3309	61	6535	585	121	606	419	621	310	578	7575	724	666	262	605	787	505	189	523	252	565	442	107	196	653	244	397	495	487	652	293	283	645
348	18.7	15424	6183	124	57	564	6380	113	70	8962	1081	64	6077	894	3934	935	1065	73	2313	80	298	420	362	658	331	551	6494	456	338	298	565	912	615	316	882	192	345	493	104	235	412	261	438	263	368	493	235	212	537
349	18.8	13970	1300	144	68	1034	7010	431	290	8534	1054	493	7329	1738	7439	1342	1371	78	1714	326	239	541	326	809	313	517	1464	422	402	253	575	741	991	577	336	299	271	251	87	284	689	157	249	344	335	262	271	193	774
350	18.9	11284	237	310	60	989	4595	299	100	9925	668	1825	3467	872	6651	3603	273	78	1715	922	300	528	319	713	1079	751	4095	445	312	334	439	769	1004	434	782	191	480	350	90	176	557	249	310	317	347	128	335	115	1078
351	19	4885	742	1866	61	228	3912	122	86	10854	81	156	7147	104	3123	2010	346	153	1517	110	392	434	459	523	3418	422	4388	478	311	216	324	536	1182	342	606	268	526	385	110	237	656	235	364	302	295	340	861	136	1073
352	19.1	215	442	611	89	87	2112	190	95	10049	59	112	7051	80	4448	5711	89	858	1606	115	967	528	246	546	5942	758	2358	392	375	126	391	658	1010	674	548	181	429	456	120	206	673	279	141	291	455	503	888	274	778
353	19.2	347	69	838	65	100	219	130	757	9845	72	80	8143	100	5920	4951	318	1278	1575	85	1223	526	420	765	2121	918	978	359	390	161	648	637	827	337	973	414	452	361	138	158	502	455	319	287	338	278	901	273	890
354	19.3	417	103	102	117	91	714	136	579	7650	96	104	6894	89	5065	2856	1178	195	665	79	1387	794	436	950	3807	1227	2196	257	361	179	363	777	944	523	888	202	581	184	141	167	703	341	337	353	452	509	830	268	767
355	19.4	119	66	368	804	73	239	100	108	10183	482	126	6137	183	6351	1552	467	84	1348	1251	469	415	293	553	1996	848	6697	290	377	183	198	432	713	588	471	295	406	358	131	241	786	310	411	412	281	519	326	283	629
356	19.5	155	123	1487	281	160	131	296	95	8317	67	247	7166	98	3630	4491	1407	98	1900	2360	90	313	512	258	715	726	7978	354	473	125	252	717	881	401	854	392	447	308	188	204	756	372	430	441	362	483	796	393	662
357	19.6	150	1543	118	1472	338	629	319	90	6463	59	96	7796	1369	7338	3487	523	106	514	86	819	421	290	345	475	736	6350	313	377	212	348	524	806	734	748	194	428	349	141	310	637	458	458	451	341	370	455	390	674
358	19.7	176	1517	966	82	1070	156	139	104	5335	63	98	7550	669	6447	5121	1204	92	220	75	702	265	400	422	579	192	1815	435	238	238	377	621	1006	774	973	334	545	435	175	166	637	438	318	433	246	252	381	244	597
359	19.8	78	1544	151	186	2728	105	100	103	7161	77	85	5570	213	4811	5317	356	106	262	561	1933	264	532	486	459	300	3838	455	316	241	248	686	836	474	578	351	458	431	142	181	352	304	150	604	404	404	508	145	759
360	19.9	109	1252	118	90	12732	155	152	87	7475	71	84	6497	84	3152	4748	668	244	1127	731	4310	408	572	623	1337	421	4411	488	324	109	231	577	902	966	968	290	454	414	123	162	421	363	226	515	379	671	543	142	618
361	20	110	742	59	86	14534	146	109	86	3413	85	88	8162	91	4365	537	89	637	550	96	5807	601	380	387	1733	378	4063	520	310	345	356	666	845	270	710	233	264	338	112	175	680	406	242	603	331	324	546	155	752
362	20.1	129	545	116	84	14901	1425	92	237	311	58	123	6627	227	5618	1412	83	779	477	222	5915	628	515	305	1969	850	6364	351	323	310	635	437	1107	284	1101	192	735	213	136	181	610	391	382	606	418	349	813	159	573
363	20.2	105	118	75	87	18749	279	83	78	126	56	566	3702	1296	6562	129	1106	786	1132	474	7805	419	706	301	2585	394	3929	471	266	179	493	602	472	469	660	192	289	637	111	270	591	441	324	442	365	398	914	142	681
364	20.3	116	81	78	70	19042	118	99	83	251	90	1420	1663	540	5051	75	1377	676	2001	88	5658	501	842	287	739	488	2496	490	333	168	806	1000	807	521	984	151	440	746	84	292	503	235	426	380	466	325	847	166	562
365	20.4	91	72	77	718	10459	88	160	109	669	82	282	857	274	3293	49	1403	60	1962	97	6392	715	579	454	1350	225	3635	324	350	122	452	488	1114	381	1907	235	394	1076	124	144	572	347	218	447	573	268	458	176	563
366	20.5	842	215	433	583	13741	144	896	78	778	55	163	1154	510	4219	48	1088	82	1835	749	1398	531	642	458	2770	513	1859	276	355	257	259	606	971	516	750	159	515	458	145	142	432	395	506	361	378	305	674	292	999
367	20.6	669	1701	96	2730	8454	153	722	45	121	76	89	722	507	4608	931	333	49	1724	113	3047	360	592	220	1244	423	6744	448	373	255	464	693	958	415	628	165	226	586	187	201	647	336	252	305	400	645	332	631	778
368	20.7	71	1989	996	1035	144	525	87	77	109	75	274	408	479	5807	2663	97	62	815	933	2674	417	600	238	2898	846	10135	475	298	320	581	515	1059	417	646	171	442	1610	101	161	621	318	139	308	360	319	645	197	1099
369	20.8	125	237	833	2785	587	560	159	85	114	888	185	1450	1726	6811	804	150	106	141	366	6178	475	590	196	1147	448	4025	238	148	291	886	424	1009	491	834	167	727	991	126	175	427	436	521	276	500	171	1050	347	1528
370	20.9	39	661	312	183	1259	943	196	359	115	92	1470	2387	246	4870	652	475	82	72	63	4331	583	531	505	308	316	7787	334	297	321	297	431	1157	355	913	249	422	512	128	193	715	313	213	263	709	234	937	241	1204
371	21	59	126	1518	1583	863	1121	164	402	114	109	885	1384	482	5425	2375	171	78	317	76	1290	577	557	392	488	332	6691	446	359	289	353	404	944	538	952	247	339	488	147	185	608	337	170	341	514	240	916	351	914
372	21.1	63	212	266	1668	175	149	84	1288	70	74	196	1196	1155	5578	597	95	79	1501	90	977	689	608	888	2419	352	4563	490	260	165	314	558	938	1061	650	317	598	1022	233	199	996	417	458	327	321	398	794	321	1152
373	21.2	67	265	771	77	87	89	101	1107	89	89	182	114	102	5606	108	94	54	562	556	5459	450	647	717	1992	494	4522	316	387	150	237	591	1490	319	722	289	473	754	289	223	496	455	444	359	241	256	732	353	749
374	21.3	56	141	1381	98	106	92	277	98	86	103	134	282	155	4724	136	143	296	772	2946	5679	476	407	1407	1647	476	2565	347	312	119	226	462	911	606	761	244	495	563	324	217	364	412	194	278	298	410	633	162	327
375	21.4	98	273	531	214	98	95	70	89	106	73	142	67	134	6675	2051	1099	524	2311	6809	3594	533	374	1375	2450	243	8047	336	146	97	222	665	926	325	665	120	465	451	136	195	615	326	176	383	289	172	589	133	328
376	21.5	109	1714	128	101	107	92	115	195	1173	89	165	79	678	4107	1391	1799	761	1418	7684	2465	502	506	1532	480	326	7424	243	207	160	348	757	1048	345	701	191	647	464	234	173	586	448	169	357	453	322	614	140	460
377	21.6	98	544	739	665	268	72	189	89	1331	150	152	853	889	5352	87	1487	846	2504	9158	3841	774	435	903	307	282	7713	376	406	184	320	447	1167	504	1174	205	436	347	153	198	701	364	263	437	370	308	490	456	366
378	21.7	384	85	884	872	136	71	117	91	1223	223	173	68	661	6696	87	1390	464	520	9270	866	387	514	573	332	472	3163	289	475	194	364	447	1099	542	795	216	303	395	139	179	273	388	276	461	376	294	293	252	538
379	21.8	344	121	94	65	116	83	180	96	122	75	147	437	124	4984	72	174	112	196	8867	264	664	616	493	426	619	1905	278	466	326	236	276	247	472	1366	129	355	365	150	176	492	388	353	288	423	346	1932	205	781
380	21.9	165	95	943	158	98	108	564	83	140	419	136	1019	1644	3231	135	92	108	96	7599	375	655	483	251	430	478	983	432	316	344	421	458	519	489	863	220	503	332	457	185	713	304	359	377	497	243	542	193	1461
381	22	125	90	222	820	93	64	172	89	546	1257	68	1097	2262	5727	772	83	90	547	9684	1266	392	440	372	1672	326	6619	303	419	230	299	714	739	415	752	184	402	403	447	181	722	394	330	329	314	396	668	290	612
382	22.1	903	796	343	797	106	124	100	88	169	694	103	1188	6111	3876	1523	655	123	1481	10789	772	462	314	425	581	364	7040	400	389	308	362	310	1062	235	938	251	353	532	348	263	840	368	247	303	263	390	536	184	416
383	22.2	1347	1805	1303	88	782	170	34	80	84	77	362	1610	7891	5045	1556	856	122	1433	14614	464	365	287	386	289	293	4368	361	248	257	174	365	1437	469	1149	277	574	652	294	269	672	349	239	401	410	630	677	149	397
384	22.3	68	1344	269	114	73	118	89	77	85	80	1003	1629	6153	1282	3282	1059	63	116	18110	1471	344	312	451	613	310	3122	278	392	382	281	468	1498	547	337	344	489	426	550	237	584	415	288	539	291	670	1054	260	357
385	22.4	100	1873	539	100	78	1681	86	84	352	59	658	135	8390	3646	4792	332	69	98	13718	1386	648	541	455	596	332	5110	346	317	315	238	529	1357	414	800	153	590	549	800	257	591	443	179	527	450	587	798	234	1047
386	22.5	80	703	105	386	76	607	69	57	119	235	352	306	8234	5619	4794	166	122	107	8412	290	273	338	1018	752	303	4347	355	367	217	278	477	520	625	762	133	572	382	1183	163	517	406	131	512	306	495	1070	314	1016
387	22.6	3543	209	613	2207	109	65	86	49	124	90	61	845	8573	4924	9494	477	1342	98	1009	110	339	244	1025	441	304	6915	458	365	159	346	424	749	439	674	138	349	325	679	144	444	257	172	337	518	447	835	283	522
388	22.7	21662	197	898	1627	59	66	71	69	211	74	58	1110	7732	5082	10805	212	228	393	11099	276	603	444	1267	765	262	3419	481	399	94	447	623	462	615	404	288	275	300	980	185	569	236	241	340	261	356	591	145	584
389	22.8	16605	817	97	678	63	86	282	166	253	129	52	648	8599	2753	8825	1214	610	73	16311	393	496	342	735	646	233	1768	503	352	176	304	389	667	539	492	190	412	413	542	211	797	439	178	418	206	329	1010	185	373
390	22.9	2643	482	309	74	89	356	1101	113	125	119	63	478	8634	2983	14578	138	124	45	14805	336	392	409	410	302	215	995	376	370	153	152	271	1319	351	730	261	454	253	432	200	494	372	267	308	340	327	1141	177	915
391	23	332	474	90	50	64	395	1289	163	75	111	62	941	8618	4034	13778	128	60	69	14055	973	334	376	683	794	559	7209	296	372	152	265	307	818	404	546	235	520	205	633	181	347	390	208	264	372	294	627	164	366
392	23.1	548	2387	72	110	177	57	246	209	114	72	847	1074	7550	6500	14600	1598	258	993	9928	2910	509	257	679	363	384	9052	402	269	263	365	476	798	636	515	308	537	367	364	157	518	212	443	259	490	336	644	226	467
393	23.2	439	2626	100	105	575	135	167	102	80	95	2335	633	7178	2461	11650	4890	322	3067	15601	1992	312	361	442	571	472	9038	482	327	346	359	450	606	322	716	337	386	223	934	172	537	312	302	417	342	458	717	218	151
394	23.3	697	1192	262	421	684	48	191	135	119	130	1412	186	7614	2699	15286	4778	176	1874	14761	3091	283	281	863	169	445	3866	319	354	378	312	535	639	224	619	128	393	319	430	216	389	216	406	451	340	418	658	174	887
395	23.4	13043	299	131	77	464	69	265	272	1008	147	415	824	7786	1917	14633	5897	381	3422	15983	5873	621	549	562	229	456	6208	583	300	143	518	407	925	246	917	136	485	301	212	172	530	227	260	394	261	787	485	143	1338
396	23.5	17832	451	1488	214	866	68	83	131	817	102	954	2065	6469	1299	16105	5123	287	6456	16702	7122	403	475	654	350	385	3934	501	370	126	635	555	774	259	523	160	427	391	344	156	392	226	490	260	382	173	557	213	809
397	23.6	17339	445	833	100	136	92	149	201	778	81	1266	84	2618	3345	9090	5924	1031	7689	15639	7199	303	383	515	651	511	6584	490	501	243	222	470	660	301	1286	118	296	817	381	200	670	375	245	340	371	394	956	149	570
398	23.7	7075	150	310	102	185	1127	116	252	114	199	572	1217	7059	5551	4294	4435	3105	10984	14522	6072	227	303	339	250	540	7270	478	573	145	353	429	819	695	653	258	325	337	232	158	407	153	528	408	257	360	266	219	856
399	23.8	16601	1145	115	1398	153	1619	695	393	103	690	1473	911	6088	4898	7389	5060	4827	11259	13132	5085	357	253	213	566	638	7293	644	455	260	146	400	861	284	478	185	415	390	281	183	598	425	224	454	347	573	190	540	553
400	23.9	15004	1444	589	2661	99	1233	209	420	1163	1457	698	1660	4009	2532	972	5015	11252	7415	11067	5224	224	314	284	716	506	9556	448	401	259	559	579	958	417	352	236	418	535	406	259	533	474	159	291	480	343	346	343	567
401	24	5633	1309	1961	6826	797	1174	2328	7083	1546	1584	820	3235	7421	3898	1607	1363	2855	8195	1654	6150	552	358	438	711	513	2142	505	400	243	274	282	872	341	779	202	184	335	189	167	253	294	189	363	194	386	216	232	1183
402	0.1	2447	306	593	928	1583	1590	948	3201	1158	879	397	2422	3058	3547	771	1045	6340	5253	1666	3450	375	351	340	568	159	862	625	421	301	339	220	325	422	514	231	273	272	146	170	185	254	264	198	440	724	325	396	1645
403	0.2	1344	107	109	832	1841	181	351	851	2270	866	206	3565	1230	3952	912	1817	3544	3321	1621	3265	305	270	342	329	212	2679	491	403	208	380	305	171	308	386	131	264	360	237	137	213	241	160	441	376	882	186	302	815
404	0.3	1990	278	253	2752	1235	325	81	298	4558	1286	218	2354	1159	1612	1071	1561	4397	1982	1361	1373	259	197	475	633	212	2142	442	216	156	314	143	169	350	260	124	287	226	366	173	380	306	203	322	415	305	282	136	1025
405	0.4	568	111	119	77	710	150	156	52	4318	387	246	2858	1065	1182	958	1131	1177	1660	371	1047	447	288	154	512	345	721	658	278	242	245	405	144	181	190	132	178	222	230	209	450	386	409	203	296	318	185	252	920
406	0.5	184	89	335	86	738	316	68	91	611	161	146	1032	577	929	937	1437	413	873	1983	741	388	249	388	126	283	3615	438	270	273	191	212	86	121	209	160	151	404	311	125	295	219	239	251	274	300	348	200	608
407	0.6	106	70	90	155	1272	1056	97	77	297	172	111	909	262	1165	1153	1518	731	173	812	960	344	209	306	236	339	3526	285	238	318	191	159	73	72	88	189	200	334	133	184	324	215	320	301	340	279	131	159	836
408	0.7	95	463	970	80	576	669	117	144	172	126	81	1357	964	1313	961	1298	349	89	93	1130	257	194	302	444	136	5158	409	251	83	327	445	102	238	59	223	174	390	161	184	375	130	150	248	372	419	111	151	506
409	0.8	86	69	95	106	794	171	180	119	344	54	136	842	724	981	1256	1025	138	76	102	1473	330	279	270	439	788	1978	370	282	169	145	294	79	381	110	150	309	325	189	114	303	348	264	368	440	408	85	228	459
410	0.9	611	277	90	94	639	237	368	78	116	59	55	710	219	1202	535	138	172	63	85	780	395	192	433	483	260	4498	389	333	192	134	136	80	262	219	140	321	667	289	178	288	387	373	243	274	325	115	192	849
411	1	1095	664	62	48	394	82	365	81	631	178	69	1011	121	867	202	97	145	96	91	883	317	301	378	766	415	10417	428	282	165	241	241	522	251	261	193	181	402	195	190	305	307	175	234	419	407	257	196	798
412	1.1	770	248	75	44	79	93	433	112	1054	141	35	742	115	796	69	63	64	84	84	73	351	156	479	283	1295	8166	438	159	174	294	213	142	443	238	121	189	405	136	104	235	173	391	309	366	478	355	142	647
413	1.2	777	201	132	85	56	93	135	96	616	67	165	527	132	51	85	46	149	64	85	80	504	107	524	498	618	4801	492	190	176	250	347	111	386	321	111	234	329	156	236	341	254	332	279	476	350	234	182	249
414	1.3	418	275	92	92	57	133	137	95	102	52	608	73	139	28	84	60	129	59	145	76	472	125	336	543	391	2241	534	397	143	395	147	140	281	241	153	157	276	162	160	225	147	298	389	326	350	135	175	862
415	1.4	193	213	84	253	66	97	154	75	110	95	384	61	83	65	51	86	177	51	43	92	538	216	278	176	1459	5563	651	329	179	364	240	138	262	297	99	140	262	127	145	487	109	380	221	303	559	120	144	968
416	1.5	69	62	60	81	114	73	127	76	143	67	68	52	86	39	38	81	158	119	49	62	301	185	362	471	1876	1789	496	239	210	194	269	165	373	97	186	427	230	131	151	261	106	247	194	317	532	275	194	593
417	1.6	91	85	73	72	76	117	265	67	78	50	50	61	113	45	85	52	152	81	74	53	412	213	366	508	1328	3710	371	268	314	232	215	138	167	256	149	217	219	179	181	593	102	254	474	248	260	388	220	462
418	1.7	46	107	773	75	160	143	97	84	95	109	42	60	120	49	194	146	204	59	60	80	156	120	321	526	1077	3469	319	430	199	227	346	183	142	348	161	439	336	491	183	453	116	257	205	386	404	244	306	718
419	1.8	59	73	1101	86	182	186	97	123	111	54	79	91	120	174	190	104	145	59	23	63	171	248	292	670	2741	5537	415	359	162	302	315	158	403	190	176	166	325	226	222	255	211	225	293	472	352	162	291	898
420	1.9	46	89	606	61	77	84	119	85	113	109	48	60	32	211	68	69	221	62	44	77	227	186	298	256	1188	9332	497	308	114	354	355	157	139	169	187	224	569	142	293	262	343	118	346	323	310	103	207	696
421	2	69	87	57	87	37	158	96	56	73	62	30	80	91	206	71	193	226	393	45	172	283	217	327	338	1019	3757	373	311	181	321	266	294	278	117	216	242	328	244	164	410	212	298	314	328	396	209	256	597
422	2.1	66	40	47	51	69	695	143	108	119	56	17	128	57	257	88	89	175	946	96	159	243	222	549	667	887	2925	331	458	197	234	333	358	582	155	134	421	212	214	132	377	199	346	399	329	472	382	134	561
423	2.2	91	407	109	63	115	441	141	102	290	112	132	114	71	352	117	129	150	1423	32	73	403	259	226	564	868	1293	518	425	182	315	216	274	277	277	110	202	363	192	177	266	183	280	243	254	244	129	178	560
424	2.3	74	463	128	40	87	329	172	96	171	101	41	280	42	377	273	330	149	2862	100	343	411	311	470	983	1465	4403	298	360	126	685	245	144	112	280	95	342	333	463	129	299	225	216	350	211	512	194	153	419
425	2.4	82	1007	108	80	200	1340	146	541	295	84	55	76	75	357	211	79	161	1716	61	298	241	479	1408	792	1407	3748	495	205	95	170	520	111	328	332	65	356	324	131	180	223	215	250	121	248	316	242	207	800
426	2.5	73	823	72	73	66	1998	72	647	138	144	63	46	81	110	68	56	160	878	89	115	260	642	926	259	227	5566	355	367	96	287	115	103	303	375	249	265	335	327	152	305	146	588	292	400	189	305	474	650
427	2.6	99	147	88	51	53	233	153	177	93	40	69	106	226	98	97	65	129	160	56	63	351	207	578	320	265	3165	485	249	195	295	111	98	264	350	214	282	343	425	174	301	150	377	233	202	301	261	341	944
428	2.7	143	182	55	71	83	118	261	170	75	54	29	246	661	71	57	43	64	86	81	81	472	422	706	352	372	3446	269	338	337	167	184	169	288	308	153	273	324	729	193	484	241	527	240	266	239	218	236	628
429	2.8	57	140	59	136	65	185	796	101	107	80	265	81	793	130	57	44	146	77	90	226	140	407	184	563	280	6532	307	268	184	181	135	308	288	353	133	236	309	548	227	496	181	310	247	169	293	411	175	1026
430	2.9	49	201	60	634	98	263	457	98	113	212	93	107	966	558	33	76	252	66	77	220	438	292	477	601	499	9621	310	339	262	126	295	243	389	413	183	219	251	500	130	359	311	198	345	337	198	170	184	975
431	3	86	118	286	864	103	132	434	147	110	680	39	163	898	912	80	96	139	48	115	112	410	339	182	641	227	3120	368	222	297	218	115	166	318	213	169	242	292	462	125	277	358	325	458	260	359	159	117	718
432	3.1	123	261	88	200	89	136	92	100	142	247	72	228	647	994	60	120	165	31	65	74	359	327	363	1045	449	3247	344	567	97	258	94	151	334	79	141	153	464	586	196	412	114	275	428	292	210	343	205	673
433	3.2	217	92	898	87	103	242	103	80	165	64	40	294	587	1065	57	97	456	62	111	96	751	578	415	1231	878	3802	309	378	234	299	286	174	379	109	160	165	96	465	142	326	185	346	146	231	312	428	219	765
434	3.3	130	70	787	58	162	98	101	197	129	62	111	869	380	1275	59	82	87	99	123	161	542	734	445	505	259	3212	323	251	135	244	306	118	404	79	225	295	239	287	147	175	126	173	152	306	357	161	164	558
435	3.4	264	86	871	72	88	89	279	78	108	49	77	437	63	642	51	119	125	78	996	71	209	259	404	982	237	2684	250	512	185	224	269	128	454	109	226	351	309	267	250	503	148	289	195	272	282	141	118	563
436	3.5	96	38	1066	60	52	79	125	66	133	39	82	227	52	572	39	170	118	69	79	268	368	233	324	467	277	1813	401	336	234	334	188	158	348	102	353	241	214	247	142	215	164	300	257	280	522	278	136	642
437	3.6	52	88	1406	57	59	76	90	89	352	61	62	240	85	694	944	303	125	415	44	108	353	379	372	1684	354	2782	230	718	189	156	313	127	422	155	237	240	131	186	187	474	160	265	210	244	436	306	103	1187
438	3.7	45	1656	1567	62	64	60	74	55	139	49	49	68	80	541	80	372	70	373	69	52	428	119	261	656	756	4253	397	443	196	313	357	113	366	238	97	379	196	260	166	602	175	583	313	219	350	316	153	552
439	3.8	60	602	439	62	152	41	114	196	116	55	78	151	71	509	83	275	103	1636	77	699	105	385	392	707	501	2143	464	301	148	278	151	127	462	160	133	274	221	122	207	232	173	189	282	275	204	278	160	839
440	3.9	63	103	72	47	81	96	326	91	294	63	56	389	59	2042	71	67	271	1638	102	1486	424	411	304	405	444	4896	201	352	199	235	186	207	394	215	189	396	254	212	188	447	236	146	200	283	552	173	123	1155
441	4	84	145	89	42	67	361	111	140	135	89	80	698	31	367	73	128	225	1304	62	1852	793	529	324	312	468	8111	354	411	296	373	201	260	350	363	125	155	324	187	166	244	334	204	476	343	209	240	215	651
442	4.1	85	429	66	53	98	735	43	88	711	159	887	1317	108	372	59	269	203	1426	97	608	165	549	364	469	423	6614	379	325	247	131	147	192	329	180	145	524	455	284	195	853	372	246	162	231	296	352	238	1130
443	4.2	81	185	45	39	76	2841	64	77	302	62	894	95	86	67	61	223	486	990	78	1326	362	650	254	679	268	1860	229	360	128	229	517	286	288	227	115	309	210	96	168	1170	129	360	199	245	227	333	142	722
444	4.3	110	195	52	66	193	2774	91	66	1924	127	618	74	82	204	51	127	130	1824	94	151	410	496	409	1457	169	5002	245	372	129	238	471	232	166	212	148	256	354	190	157	1049	125	107	375	211	285	95	206	978
445	4.4	59	129	259	77	258	4251	67	67	626	86	108	72	55	470	105	103	94	3393	102	278	603	287	459	1522	347	3892	288	463	164	297	293	154	189	377	293	134	337	123	218	783	136	133	198	470	177	138	144	605
446	4.5	60	63	432	95	98	7341	150	58	480	125	238	71	54	1900	120	79	264	672	90	172	341	242	362	3292	169	6131	267	331	125	321	228	181	242	285	180	417	340	101	136	371	165	278	274	384	305	76	182	533
447	4.6	79	67	96	79	79	3413	115	63	119	76	78	60	41	2213	323	155	118	941	104	83	461	153	371	252	128	2848	346	370	118	156	164	191	272	268	176	544	262	206	196	348	199	350	63	256	218	204	154	819
448	4.7	96	127	161	102	199	4322	142	86	144	92	129	59	86	768	1022	539	99	109	56	77	278	182	228	325	215	4214	310	365	202	245	192	222	457	187	127	184	259	169	167	478	127	303	220	211	189	113	210	661
449	4.8	69	1043	67	62	390	5928	315	81	126	85	95	54	113	373	834	471	121	85	371	108	322	355	285	240	407	3924	303	300	108	249	271	175	426	156	121	325	197	130	145	162	138	283	136	237	218	112	148	619
450	4.9	49	1429	45	85	51	4796	136	230	120	64	73	85	145	395	391	315	135	100	1010	75	616	586	269	268	246	4861	243	208	123	209	314	110	176	211	182	873	205	201	145	590	180	243	370	353	249	132	112	1045
451	5	134	80	81	83	117	1026	98	526	84	73	59	67	229	189	73	75	117	83	1516	63	415	522	296	248	701	6684	273	90	178	198	187	128	134	234	282	274	274	223	209	350	178	754	194	307	163	212	263	911
452	5.1	239	64	61	65	158	137	120	1002	158	82	98	40	522	52	278	78	53	100	251	61	379	277	233	223	594	3165	279	327	205	190	247	160	247	146	228	229	313	158	158	532	242	640	107	310	271	162	388	919
453	5.2	463	59	51	84	90	278	116	1537	211	424	54	191	756	53	86	55	132	92	115	42	426	251	352	601	993	5758	312	446	164	155	274	144	218	336	133	340	325	138	267	321	518	392	282	390	426	208	255	557
454	5.3	129	61	221	628	83	312	116	74	579	406	82	89	156	57	73	85	293	157	82	23	436	430	741	1523	565	3811	202	110	338	271	363	136	232	400	72	315	294	149	160	355	226	308	307	258	307	231	107	1238
455	5.4	68	61	611	1187	48	322	85	162	285	86	90	55	998	78	61	214	748	76	51	80	485	328	410	4454	564	5399	236	152	116	685	108	274	344	361	117	479	316	135	182	497	147	121	195	243	382	71	196	631
456	5.5	50	58	69	1062	43	256	118	76	133	88	77	112	532	53	63	73	347	53	92	36	607	289	381	2336	276	2934	233	156	312	337	484	324	329	309	215	369	279	170	151	195	125	90	214	249	407	126	183	606
457	5.6	78	47	84	843	60	170	868	109	151	70	340	222	80	142	46	202	1168	66	81	267	525	304	312	2362	648	4157	302	101	118	365	244	318	291	191	172	158	193	122	146	129	108	73	212	239	354	136	419	631
458	5.7	71	122	69	903	88	96	1811	84	116	64	75	430	71	77	77	114	1163	65	76	64	453	203	331	791	1138	5011	338	120	87	275	174	154	448	252	137	220	158	129	150	233	164	197	75	327	500	156	166	389
459	5.8	40	282	84	833	72	174	553	60	96	95	73	1333	231	193	251	131	790	75	56	100	522	266	364	646	333	2781	267	106	155	388	314	143	396	206	193	329	172	134	144	127	149	242	343	159	405	186	158	406
460	5.9	41	1427	97	93	54	86	1686	59	86	88	46	1179	513	227	74	58	1298	62	71	69	464	166	274	1055	214	3617	364	140	88	192	188	130	533	257	102	284	192	227	174	225	111	207	133	306	256	178	202	1242
461	6	150	1566	60	93	67	300	569	58	63	165	54	1444	346	1791	64	53	971	111	70	941	429	225	430	1907	286	4484	362	172	192	217	298	140	252	247	143	357	322	192	103	196	107	42	181	165	276	290	141	627
462	6.1	76	1397	53	59	65	226	174	43	93	309	35	2071	246	1261	59	89	676	69	63	450	563	184	374	2885	147	3545	243	150	271	256	180	146	314	201	176	481	135	210	160	155	127	484	256	222	264	220	221	912
463	6.2	77	1022	150	75	168	164	124	60	90	99	69	1779	177	2251	67	55	350	94	29	973	764	422	366	1792	242	4881	222	171	102	136	192	145	541	243	191	491	208	232	170	149	207	605	442	409	408	280	140	620
464	6.3	70	1005	1260	87	61	141	83	64	121	93	85	986	61	3316	83	38	483	69	132	469	644	431	645	1665	366	4035	282	117	115	179	297	153	279	237	139	561	445	252	129	186	163	257	247	423	300	166	178	468
465	6.4	71	1334	473	53	62	142	77	67	115	63	86	451	54	3012	79	72	151	513	119	69	422	403	469	1343	244	2947	243	146	166	132	231	178	216	236	214	552	168	232	164	219	159	277	404	369	310	108	126	659
466	6.5	65	1297	90	92	86	59	87	234	124	67	218	95	73	1477	73	84	105	54	53	59	350	153	284	203	228	3299	319	95	90	459	249	361	369	203	164	390	322	179	196	371	127	431	353	408	349	100	79	854
467	6.6	42	110	65	74	105	242	97	103	268	57	136	79	96	488	52	467	84	96	100	265	376	267	292	391	315	2576	308	141	155	204	238	836	430	191	158	482	236	193	229	383	152	185	248	263	266	120	206	987
468	6.7	50	88	55	83	94	318	106	78	104	86	526	108	71	271	49	537	91	71	60	81	508	376	402	402	1138	3953	317	225	134	204	202	597	104	240	179	524	341	147	246	121	142	86	102	310	430	71	119	923
469	6.8	35	92	310	75	77	104	276	44	302	60	474	46	81	289	43	106	141	101	77	99	493	234	371	573	241	4489	314	443	105	233	265	513	265	233	114	749	96	174	168	279	154	239	69	283	513	200	130	769
470	6.9	53	246	100	73	46	55	153	73	309	63	226	42	108	130	66	83	225	536	62	154	364	484	420	1043	311	4727	258	319	313	180	193	634	215	109	133	368	125	174	156	175	125	110	191	138	244	190	146	513
471	7	43	74	57	283	44	191	115	123	565	64	196	66	1204	64	73	59	70	1586	81	873	475	689	271	446	1234	1306	245	483	52	116	243	410	207	55	72	667	231	179	245	221	138	277	171	346	410	127	131	934
472	7.1	52	84	44	101	64	266	96	116	584	77	319	59	397	59	299	112	85	1985	67	1540	390	485	319	1512	307	3146	316	488	158	222	185	226	196	103	177	279	251	262	287	198	186	352	162	266	582	341	364	549
473	7.2	144	89	53	154	51	682	92	136	116	438	268	102	1086	39	74	233	118	1288	196	1670	380	640	267	2233	266	3092	312	673	145	123	194	96	298	121	189	441	297	134	207	169	174	386	183	274	314	49	160	690
474	7.3	72	325	57	99	75	149	114	285	117	984	245	123	764	61	170	173	148	1075	609	358	536	559	433	1510	309	5057	229	322	271	261	133	76	476	189	92	332	354	177	216	187	106	240	505	238	328	46	163	1093
475	7.4	170	394	519	138	116	267	68	990	124	115	160	226	86	79	78	86	75	860	1132	79	630	285	323	672	453	4594	506	714	219	360	294	165	229	185	87	636	449	197	187	280	210	239	122	213	413	78	166	699
476	7.5	278	1831	1230	309	69	141	69	499	323	128	114	439	216	57	178	95	169	98	955	111	524	245	275	281	480	3800	516	469	226	430	235	171	409	257	225	414	338	226	211	224	124	336	103	256	479	201	168	797
477	7.6	130	103	653	282	224	103	89	1079	282	141	211	418	261	41	1163	64	268	95	150	373	445	197	321	1189	489	1080	358	449	218	181	621	500	243	216	115	424	471	198	227	298	175	313	112	124	516	90	258	422
478	7.7	81	89	53	186	452	84	84	271	336	196	100	840	314	62	1451	228	121	327	45	678	324	230	295	918	371	6202	267	754	115	295	230	766	134	315	149	323	293	185	236	237	325	192	186	379	430	127	302	484
479	7.8	71	78	67	88	538	90	94	464	276	69	88	128	394	90	1382	141	209	170	71	1300	318	174	470	1261	362	2278	229	527	97	176	251	401	460	164	104	475	149	282	160	183	136	260	255	197	357	209	178	909
480	7.9	75	132	61	34	695	73	87	185	678	66	57	75	65	59	1532	87	178	75	79	976	230	242	302	194	684	1754	326	656	78	309	182	980	640	195	162	562	256	667	145	217	154	336	311	219	272	94	367	538
481	8	46	257	61	73	55	308	69	87	313	61	47	129	88	58	72	62	239	158	64	59	223	405	363	574	579	3121	330	571	117	314	273	325	245	221	86	630	302	799	166	337	206	291	116	393	388	161	137	780
482	8.1	77	160	58	59	78	1284	75	65	399	48	328	84	84	115	99	83	179	538	109	99	359	501	390	257	499	4539	266	315	169	371	306	251	241	222	84	481	204	707	122	346	127	301	206	149	350	212	129	588
483	8.2	56	145	46	72	70	3092	79	59	655	217	275	66	86	69	110	140	133	701	178	94	473	498	331	262	916	3930	363	728	173	420	123	276	206	177	231	400	319	574	206	211	196	370	206	99	253	404	166	557
484	8.3	197	397	38	183	58	564	136	62	273	110	180	75	102	88	53	337	126	195	53	222	399	525	377	413	735	2255	333	568	121	146	303	247	252	260	113	490	306	589	259	178	310	288	173	274	197	206	169	545
485	8.4	50	1342	46	84	101	508	368	48	107	537	235	87	200	347	61	85	128	360	34	68	363	419	407	321	718	2507	368	883	226	376	320	240	204	132	108	612	334	541	227	222	153	190	246	241	335	179	141	1024
486	8.5	54	689	92	78	65	162	204	48	99	193	89	99	102	379	349	74	158	87	556	91	349	233	578	808	515	5106	365	797	181	212	241	179	236	235	161	309	218	554	118	201	325	175	208	415	383	347	120	887
487	8.6	47	128	56	168	60	76	350	52	97	269	251	51	147	146	177	80	214	111	155	197	373	206	307	793	526	3417	339	627	86	265	190	331	324	180	236	352	346	605	246	339	111	106	191	230	334	283	136	1439
488	8.7	140	72	93	160	43	82	857	59	87	82	197	51	69	48	114	47	174	95	406	124	418	212	389	990	162	2238	309	784	154	391	119	378	196	113	86	444	320	436	144	172	230	174	209	224	307	315	122	641
489	8.8	69	31	52	72	63	58	55	69	89	48	167	81	60	74	193	59	178	440	256	331	416	204	262	740	309	4804	355	562	129	267	153	398	128	258	94	256	289	531	156	226	129	336	313	234	338	186	100	606
490	8.9	80	159	494	61	102	69	39	98	70	56	141	141	106	66	205	26	108	272	68	1483	432	209	802	214	260	2144	433	480	80	439	371	346	231	306	95	257	513	583	141	239	81	210	289	276	338	148	92	613
491	9	75	65	101	45	99	29	58	98	108	51	156	86	95	43	78	179	134	503	68	934	261	412	385	479	541	1290	225	792	137	253	183	134	543	230	151	297	286	558	156	234	133	132	106	323	299	189	169	452
492	9.1	81	62	90	76	78	70	47	70	92	65	146	802	516	75	64	78	106	108	53	625	341	512	491	293	500	2718	187	632	290	757	309	156	422	299	140	366	227	534	134	323	186	411	199	290	209	131	142	616
493	9.2	65	35	518	250	96	84	45	201	305	96	139	809	81	145	76	87	93	167	53	115	482	426	392	1120	393	2158	335	646	155	265	232	100	285	209	76	579	280	507	134	265	176	332	91	291	394	271	121	289
494	9.3	42	58	268	220	80	379	42	67	94	78	196	1188	81	79	52	61	75	502	34	135	560	294	482	1454	286	1248	309	777	111	388	219	184	297	178	139	399	413	418	147	202	210	274	189	203	304	171	124	1035
495	9.4	62	47	69	77	86	198	70	77	295	66	621	203	91	84	47	73	297	119	61	280	528	208	492	1894	130	3744	389	619	72	316	141	167	252	102	84	299	420	508	137	207	262	135	252	286	487	140	268	1201
496	9.5	56	71	102	85	79	343	56	77	108	69	641	57	65	344	62	391	172	613	34	624	222	197	576	2951	136	2145	392	860	97	248	312	734	193	107	88	445	204	593	207	346	228	399	296	291	225	213	158	995
497	9.6	115	430	86	58	163	106	28	64	67	103	481	63	188	482	59	1209	133	115	55	330	236	220	598	822	213	4593	283	710	122	260	195	160	440	185	139	397	346	513	187	194	265	369	294	227	173	150	132	712
498	9.7	101	262	866	159	49	102	64	30	68	66	200	227	134	694	207	608	252	98	88	48	91	181	764	155	331	4053	322	667	168	237	163	201	360	283	104	283	197	326	119	124	200	151	306	356	307	70	179	638
499	9.8	100	316	126	219	97	70	87	70	120	95	275	52	527	465	58	892	952	99	47	509	181	186	572	397	333	1819	227	687	131	275	467	277	254	266	77	198	465	454	200	225	205	135	309	369	243	177	158	800
500	9.9	44	324	474	344	64	120	133	154	115	44	216	53	122	703	106	1399	179	95	81	784	265	189	646	244	197	974	276	588	62	94	378	194	402	194	67	434	137	264	187	192	134	391	231	183	278	167	147	721
501	10	51	128	66	831	53	309	117	151	99	118	88	51	148	361	538	473	111	75	435	55	467	214	310	190	1188	7469	300	1071	149	129	350	215	211	135	115	411	134	126	178	465	198	162	241	279	338	374	135	475
502	10.1	46	135	78	1264	75	454	395	73	80	40	108	50	88	72	448	1081	104	83	170	246	336	220	656	415	908	12615	379	721	128	206	95	213	175	169	101	317	129	138	188	207	191	241	285	320	251	240	118	741
503	10.2	57	110	63	911	88	289	86	119	115	48	60	64	79	198	809	225	89	90	227	75	373	295	379	676	296	2383	302	384	108	135	193	444	219	334	62	413	189	59	237	539	178	214	235	148	265	282	152	430
504	10.3	63	203	75	1216	103	295	67	89	94	62	66	41	445	99	313	73	121	66	83	460	465	389	627	257	102	1885	408	788	169	120	207	277	423	255	84	301	149	69	239	305	151	344	289	240	245	176	141	606
505	10.4	75	95	71	109	91	622	76	126	506	407	87	43	1681	139	992	93	93	51	49	1532	308	198	180	539	488	2143	427	719	193	138	155	138	347	174	159	319	290	75	212	338	192	353	66	159	292	340	107	595
506	10.5	57	77	56	66	55	675	50	80	945	845	81	101	1418	108	567	78	76	1638	85	1324	296	228	526	525	216	2500	476	495	172	99	359	131	206	285	172	473	260	92	158	299	143	170	277	316	352	129	243	814
507	10.6	132	898	468	57	95	71	87	76	299	1084	101	49	2178	68	245	113	92	1160	70	900	162	283	497	524	315	2308	213	466	252	72	247	187	185	184	151	468	299	94	143	115	227	176	384	257	385	117	180	753
508	10.7	268	2226	97	60	58	71	225	85	860	165	86	134	760	50	66	284	91	1285	64	161	269	196	605	237	182	2908	270	751	174	150	239	243	190	209	117	396	504	87	159	159	287	194	462	352	268	173	252	1042
509	10.8	167	821	185	94	57	73	104	61	772	69	126	60	177	68	75	434	118	1612	74	82	269	190	645	393	367	3556	414	706	128	127	261	301	390	178	197	400	347	205	155	230	171	260	97	196	325	183	212	524
510	10.9	52	80	807	96	149	76	69	92	101	238	548	82	1439	157	57	436	97	955	56	175	267	116	345	425	771	1802	384	793	189	113	199	158	403	137	106	308	302	211	127	607	143	60	200	223	299	380	581	512
511	11	59	76	582	75	77	96	87	57	80	101	627	115	457	849	61	70	90	105	99	84	363	255	293	738	244	2489	368	726	129	162	485	108	411	236	78	275	233	142	238	187	130	117	327	267	381	169	193	589
512	11.1	51	257	1069	43	76	111	75	92	94	93	494	1430	453	383	58	65	132	141	64	59	204	151	325	78	369	2874	236	525	324	121	398	132	308	266	124	190	254	178	150	183	117	389	482	253	502	94	206	491
513	11.2	35	961	321	91	174	92	108	82	125	156	354	2693	818	125	325	98	320	82	42	248	335	578	1629	466	291	6905	340	277	198	136	340	196	369	198	137	146	372	307	224	261	154	183	395	201	813	246	208	671
514	11.3	55	231	841	104	82	136	78	68	250	50	166	977	83	105	49	76	1138	59	69	318	426	263	376	416	352	6496	223	719	150	93	151	129	349	233	186	296	570	267	201	471	162	140	68	215	317	291	178	1266
515	11.4	61	387	86	112	136	87	255	69	108	168	157	865	214	108	836	112	341	120	399	494	489	263	465	572	816	2254	320	682	198	145	189	293	259	189	159	331	256	178	127	329	173	143	427	412	512	229	173	715
516	11.5	60	142	663	68	77	67	753	21	138	318	143	116	263	88	169	53	111	448	140	60	324	206	1039	327	814	1629	393	384	243	102	198	179	184	347	134	255	186	87	144	512	169	207	130	212	239	264	129	930
517	11.6	83	165	96	82	115	190	1172	77	325	101	153	101	177	39	64	81	173	66	85	54	421	264	481	174	434	4045	285	972	233	120	186	151	264	339	152	208	215	101	157	231	112	170	164	177	321	245	145	921
518	11.7	120	211	141	403	242	458	672	131	234	77	111	116	100	92	88	193	266	67	94	55	335	206	539	262	1317	2939	374	859	212	132	213	161	364	229	134	222	316	140	104	350	401	346	186	318	456	151	344	991
519	11.8	157	256	185	723	368	725	171	185	143	52	231	93	120	92	66	112	91	118	79	78	249	147	596	349	2200	1833	462	745	190	143	240	171	464	119	155	156	240	111	116	450	169	102	212	204	287	207	160	868
520	11.9	69	81	123	398	63	302	725	310	258	80	226	89	57	68	48	163	95	81	56	84	179	286	373	325	840	2481	186	588	131	187	228	279	213	272	177	204	381	231	311	215	177	90	206	133	207	282	188	568
521	12	54	61	95	70	51	776	371	846	105	42	369	58	767	88	67	104	174	73	57	216	209	263	269	474	204	4739	205	561	120	154	131	122	187	277	103	376	433	199	100	293	116	127	215	190	282	287	189	227
522	12.1	30	39	340	69	33	195	145	351	83	87	89	47	547	68	218	68	105	68	95	150	271	162	591	287	550	2522	219	212	156	106	217	139	388	222	170	363	437	113	220	191	150	122	199	233	349	252	140	881
523	12.2	72	41	299	76	63	60	121	418	98	59	110	71	257	75	78	60	116	72	134	163	439	170	486	832	818	4594	295	581	132	216	320	142	297	198	107	372	206	118	195	176	217	161	303	413	470	421	310	1148
524	12.3	88	57	460	83	85	61	113	78	111	76	60	51	162	164	72	176	93	64	89	86	279	255	402	380	1041	1598	343	552	135	327	413	132	560	255	183	461	393	111	195	174	243	94	374	335	432	142	133	750
525	12.4	58	58	298	88	150	110	79	73	136	49	68	60	528	218	52	62	98	481	72	472	289	306	353	1101	2345	5590	110	975	203	164	177	181	425	304	191	332	320	123	202	228	182	140	221	270	530	297	171	256
526	12.5	60	212	59	88	55	108	68	108	362	46	43	68	145	211	64	52	131	231	70	979	366	179	1015	990	562	1953	318	532	143	644	333	193	285	294	175	296	284	109	140	341	120	454	149	179	241	207	148	644
527	12.6	53	67	59	107	89	102	81	92	120	100	199	42	55	181	64	205	186	114	87	621	265	150	481	1000	744	1838	319	784	68	283	228	167	450	148	149	497	179	183	245	199	260	482	166	119	315	266	126	762
528	12.7	165	142	63	59	161	98	81	68	84	100	86	85	158	102	44	108	112	110	101	472	192	99	386	1265	285	4309	308	939	129	208	89	160	162	159	158	474	111	97	159	131	341	378	133	333	359	170	153	244
529	12.8	266	183	65	65	742	78	95	43	111	93	54	113	448	78	122	169	108	75	53	106	331	149	355	3073	278	2749	307	458	155	404	83	176	169	250	157	456	232	150	157	359	215	548	520	228	422	250	222	872
530	12.9	125	1266	45	74	66	136	85	55	64	77	94	86	1783	75	168	105	110	106	121	258	298	206	1057	515	203	3123	325	507	246	419	172	215	200	222	125	295	501	214	158	401	124	208	211	183	328	183	249	646
531	13	338	702	48	34	74	123	103	41	85	71	97	295	216	57	84	334	99	399	963	182	409	255	1211	269	170	9065	271	747	360	672	314	245	534	300	108	322	223	172	218	319	163	346	261	164	262	305	218	806
532	13.1	63	427	70	40	87	122	70	58	107	243	63	280	41	63	57	253	182	99	201	513	319	215	599	762	447	2485	304	613	97	208	362	214	298	258	181	340	269	243	206	419	215	286	165	233	361	297	157	1038
533	13.2	68	203	67	71	112	83	1002	70	83	87	66	453	87	80	214	499	116	77	65	954	336	207	1970	963	279	2255	157	724	101	274	293	152	267	225	136	337	330	199	136	450	108	204	167	236	536	365	144	1091
534	13.3	114	83	109	48	67	61	832	205	317	79	136	124	73	40	65	49	82	530	65	320	403	278	336	846	349	1195	303	596	162	158	170	194	347	311	233	489	270	218	101	511	196	398	148	279	605	214	157	1002
535	13.4	82	41	91	265	110	65	1661	90	286	73	124	821	145	214	62	203	62	857	101	157	315	222	382	2278	456	11205	345	446	193	160	168	169	126	245	229	393	419	154	235	602	125	190	291	355	347	256	216	1028
536	13.5	170	104	80	256	123	67	72	72	383	67	145	121	250	438	82	124	138	147	79	196	270	326	324	275	373	2263	209	1042	198	303	226	425	182	356	167	365	195	144	172	419	143	56	289	280	539	288	128	955
537	13.6	67	372	586	357	440	72	99	68	360	245	51	165	710	100	84	93	228	82	78	937	199	251	272	280	722	2985	231	994	204	381	169	576	411	199	123	390	398	148	170	441	152	446	296	227	365	202	110	584
538	13.7	59	260	117	107	234	68	142	139	112	128	71	106	124	47	832	168	117	69	52	722	311	272	267	243	872	1502	325	505	175	380	98	635	344	136	169	298	251	259	243	470	109	529	469	232	356	223	141	760
539	13.8	81	370	101	74	132	156	399	126	105	66	84	69	96	71	490	256	100	127	82	786	251	334	378	345	659	3570	350	797	260	118	239	654	414	144	119	261	199	113	133	549	168	183	260	240	319	236	123	697
540	13.9	84	111	725	72	98	108	249	201	112	71	97	210	307	58	693	812	86	524	93	523	271	354	543	235	1210	3291	241	647	268	273	111	880	177	222	83	263	221	121	197	488	89	272	156	199	265	372	96	529
541	14	108	63	144	65	81	79	163	408	80	47	86	175	1088	77	297	908	152	115	85	107	298	308	184	349	1741	1686	398	955	229	187	265	725	91	150	127	313	271	115	109	566	104	208	320	171	296	127	137	1375
542	14.1	64	62	149	90	98	71	165	562	76	65	46	138	684	70	86	314	164	123	80	123	342	250	158	234	727	1723	403	672	163	137	244	626	208	301	103	344	236	213	303	627	207	225	226	136	581	177	158	458
543	14.2	66	46	1070	70	45	79	139	249	110	314	122	66	57	59	78	831	85	78	77	71	362	104	250	335	198	8209	468	696	92	192	308	641	251	187	162	291	357	229	243	718	206	379	295	358	365	194	191	694
544	14.3	107	50	487	95	75	92	113	126	95	84	1095	198	91	105	67	509	165	492	83	62	573	158	232	561	217	4291	336	694	94	280	301	686	314	247	113	421	438	270	150	525	253	380	294	379	411	224	130	631
545	14.4	72	437	564	306	55	91	61	76	86	92	604	581	57	242	43	298	73	203	91	177	298	210	161	822	496	1832	183	297	232	288	420	614	349	318	210	326	315	300	141	715	169	339	133	149	972	146	106	1028
546	14.5	134	914	936	1107	51	146	270	74	93	74	250	651	52	313	67	100	377	82	174	153	132	240	407	365	515	1256	220	660	344	257	143	481	229	280	158	293	359	153	288	585	185	340	221	149	682	241	86	561
547	14.6	109	1640	83	218	243	649	686	74	338	51	186	85	48	711	293	106	889	107	325	578	305	190	765	343	577	4137	337	1089	115	256	121	457	203	249	176	284	283	117	250	620	168	277	328	212	550	194	181	1138
548	14.7	80	131	70	52	120	367	797	83	116	121	122	70	137	370	76	142	1270	118	349	957	309	189	260	245	589	1824	356	356	314	174	328	237	242	262	164	391	317	87	152	731	244	383	158	337	328	281	133	446
549	14.8	74	74	618	96	56	157	1023	137	349	232	234	210	868	54	58	180	183	97	356	768	203	155	736	230	461	1894	262	981	155	157	180	202	272	214	163	241	332	155	137	199	115	283	345	401	348	258	123	814
550	14.9	53	65	115	75	75	140	58	73	113	83	186	65	422	52	54	79	91	152	54	80	220	182	609	216	676	1881	241	706	209	158	138	176	329	163	153	283	284	204	172	226	190	135	161	248	372	129	195	673
551	15	97	44	108	62	79	102	63	63	90	59	136	68	130	80	57	141	94	622	93	220	294	188	1600	258	281	6785	294	855	153	201	168	101	313	224	175	336	225	102	204	182	128	64	224	258	229	240	776	611
552	15.1	63	60	82	69	67	295	62	187	154	46	69	305	70	49	76	534	225	1192	108	84	282	222	1300	371	774	2152	286	644	132	139	144	193	209	168	159	344	280	104	226	506	143	219	174	280	281	134	547	513
553	15.2	57	39	109	357	65	122	125	78	139	59	178	196	64	75	240	249	109	1447	54	343	432	306	517	404	711	3987	304	467	302	321	254	191	227	167	120	379	379	144	221	381	126	268	213	368	307	194	190	401
554	15.3	101	45	305	340	108	77	44	74	112	70	173	401	100	88	56	130	86	765	45	163	158	228	151	767	871	2290	345	492	144	312	200	185	185	195	117	345	340	120	211	454	180	112	147	304	567	269	269	592
555	15.4	82	69	1060	101	83	89	108	98	80	41	156	137	92	75	58	265	82	132	97	254	162	203	378	183	888	4178	327	460	67	241	141	182	118	287	104	240	192	222	208	252	141	142	154	306	370	245	376	1178
556	15.5	69	57	501	203	81	83	435	92	119	67	131	116	75	46	53	71	120	113	72	365	218	339	675	429	543	4437	348	537	114	104	165	168	282	216	131	299	319	186	129	541	121	107	242	229	439	193	155	532
557	15.6	162	330	75	118	93	123	112	193	113	472	471	100	203	56	64	81	74	85	68	209	347	336	734	389	311	2601	237	547	172	205	479	146	137	294	118	238	158	151	222	1158	182	397	249	303	582	329	311	705
558	15.7	115	1066	69	97	54	91	97	70	90	293	268	691	990	73	100	93	223	69	236	83	220	276	686	108	633	5074	162	381	123	238	200	110	313	309	137	253	405	121	247	984	188	498	302	306	659	295	221	825
559	15.8	79	621	428	83	74	87	68	80	81	55	113	100	147	455	237	64	124	92	76	61	170	292	678	297	194	1744	195	557	126	275	151	138	411	95	216	222	654	164	201	561	211	243	462	160	414	335	779	992
560	15.9	58	144	73	87	281	226	55	74	582	61	76	141	236	2425	415	193	193	1142	226	147	185	254	531	216	439	3464	397	424	204	327	150	162	177	312	209	278	346	138	243	524	331	456	290	303	345	304	333	851
561	16	344	1084	562	1544	619	226	233	123	726	489	1492	2752	1742	5472	1379	1740	1957	2881	2218	1361	539	430	2071	448	694	9566	797	385	216	824	394	163	689	322	142	250	430	279	156	283	229	262	266	271	313	516	241	497
562	16.1	639	2498	288	2461	1283	975	335	571	913	450	1289	2403	1952	5506	1539	2497	1189	2312	2004	1426	664	276	2853	212	448	17492	813	899	178	303	471	249	478	247	222	390	609	183	188	361	175	438	317	378	372	860	525	376
563	16.2	1348	1947	1824	2393	752	866	1354	700	1080	880	798	1345	918	6243	389	893	1528	2246	656	1102	490	308	1734	459	459	21863	1025	382	107	609	567	253	357	317	133	583	343	249	257	286	224	198	580	376	217	649	278	894
564	16.3	917	1659	1258	2566	362	1224	595	723	2149	441	681	816	322	6239	251	774	1335	2565	1411	1471	513	454	1537	302	632	14265	1064	648	99	1009	323	283	412	555	153	429	571	276	226	310	251	307	408	319	234	634	357	499
565	16.4	175	67	1944	1956	539	1704	1540	192	604	730	420	155	481	6154	1427	1092	1070	1656	2591	4596	417	491	1940	391	521	10839	1134	662	126	1131	473	295	315	540	184	252	213	149	229	353	364	479	638	204	133	977	202	291
566	16.5	93	411	664	1412	375	851	1262	1453	1164	191	1866	70	521	6322	1017	283	818	290	7484	6488	314	417	1696	318	815	13766	1110	340	238	928	555	259	324	374	168	206	361	194	294	377	323	317	540	316	356	325	186	518
567	16.6	108	1144	1224	1216	1096	387	611	15945	702	553	514	4216	819	6170	971	596	422	797	9167	10518	418	441	1829	325	1224	7292	1267	302	237	868	226	432	439	484	155	374	485	346	288	273	345	238	590	445	442	350	129	692
568	16.7	373	1176	298	1466	15435	446	3513	17673	141	982	840	6834	60	6540	406	1147	522	2096	10506	9849	402	478	1740	316	1154	15820	1195	523	131	1214	558	587	678	541	220	310	552	314	229	434	469	382	375	457	526	358	147	707
569	16.8	86	3255	2377	113	14980	89	4265	6488	419	51	195	8540	77	8454	135	139	1213	1040	10644	12233	578	455	1419	217	1249	8581	782	330	228	741	395	701	243	301	249	478	288	191	255	404	499	261	437	455	393	688	149	1040
570	16.9	60	8484	1554	1813	13331	325	657	738	111	305	603	9150	205	5554	103	964	473	121	10443	8325	555	404	1052	417	1220	4248	611	928	198	554	400	1106	512	703	161	277	770	101	163	306	372	290	351	435	275	474	168	556
571	17	65	11653	110	6657	14830	53	1596	84	368	536	503	8654	1161	2531	283	824	308	132	8564	11327	518	319	698	368	942	3812	989	502	206	564	541	1045	346	315	119	211	1426	135	247	278	379	204	472	401	242	672	172	1163
572	17.1	70	15344	1414	11449	13972	107	1833	103	1995	498	106	8664	738	7604	469	180	100	1092	18940	9872	300	331	1609	302	1017	416	946	538	182	935	689	682	607	392	118	346	431	145	274	381	213	570	581	378	377	477	302	853
573	17.2	46	14224	643	10344	3842	91	983	111	479	78	141	10704	799	7990	86	112	454	3059	12545	12687	261	359	2532	641	809	15346	719	677	192	946	386	768	329	446	128	200	378	132	193	321	316	264	471	193	243	375	242	706
574	17.3	52	3663	330	11764	355	90	269	595	94	72	239	10001	99	6832	341	3905	174	1212	18723	10960	472	425	2310	725	1181	18556	733	644	239	1181	273	884	448	298	90	253	352	99	343	350	261	84	511	306	359	381	189	316
575	17.4	484	1578	444	3662	84	255	125	93	87	89	1949	10771	1412	5990	69	6995	713	722	12090	2918	333	696	667	350	1067	16257	1108	255	215	897	364	1021	530	447	115	314	460	130	270	377	216	149	283	236	476	473	226	262
576	17.5	791	1457	262	4407	313	237	562	202	85	95	1360	8477	470	8149	96	7736	392	1394	1496	789	589	768	1073	222	1016	6530	1068	209	210	855	542	884	603	327	139	514	618	189	254	530	364	132	245	447	374	222	390	710
577	17.6	62	7729	1233	12306	70	73	136	85	1013	1071	1313	9621	813	8060	95	9113	1085	1259	545	884	348	761	1328	461	958	5776	917	224	267	571	431	794	358	391	126	323	222	156	272	359	207	289	533	320	206	465	636	466
578	17.7	62	11514	1443	9113	95	262	777	85	4563	1350	477	8767	100	6814	1084	9175	1531	431	505	1346	322	885	1612	452	1214	5019	955	587	244	762	581	968	414	482	81	464	502	195	242	300	224	288	379	245	454	596	231	984
579	17.8	81	1276	11993	6598	80	1285	1161	95	6705	11801	988	8930	131	7186	1316	7918	1282	944	10557	106	244	859	1641	208	874	11221	561	397	232	648	604	905	373	433	100	392	612	173	286	607	261	390	640	297	324	312	383	393
580	17.9	75	380	3000	15499	90	90	568	409	6419	13742	1326	7323	1784	8107	1541	8134	326	1641	9851	474	396	639	1044	497	312	17656	589	422	111	965	392	821	504	300	93	472	291	174	227	446	389	187	166	313	508	594	216	652
581	18	59	107	611	10476	61	114	468	93	4485	18033	152	9039	5394	7085	101	7438	132	379	3489	420	599	680	864	496	275	9206	564	519	111	290	328	998	573	580	119	402	369	190	170	407	300	238	263	328	383	775	211	521
582	18.1	45	126	895	7699	87	99	388	107	5268	16421	165	9231	6199	5287	82	6736	100	148	16872	1653	450	902	909	330	508	2992	586	778	240	409	531	978	586	259	222	308	504	132	192	339	468	99	247	368	410	732	244	599
583	18.2	174	77	1323	6971	70	730	157	115	6188	18092	162	8221	8178	3518	77	6456	145	152	15717	827	359	807	814	418	941	1344	904	425	227	217	263	1029	797	535	169	301	638	169	225	380	331	381	321	381	386	1366	377	496
584	18.3	202	780	358	7336	85	98	178	116	6563	7681	142	8599	7172	7940	84	6404	153	184	8246	531	487	815	427	448	858	8182	666	604	132	357	464	838	523	649	262	395	578	217	275	313	268	416	257	401	271	1377	256	751
585	18.4	196	1856	748	9194	73	1461	359	263	4267	1001	162	9199	8030	3941	89	5878	144	530	16341	130	472	745	636	572	440	19696	687	646	138	312	595	578	299	838	134	369	589	156	231	410	157	338	165	100	303	1027	289	295
586	18.5	52	1328	94	8040	63	5274	1630	654	5306	371	368	8545	7607	6605	251	3210	334	111	13963	788	342	804	1082	537	554	7342	342	465	171	336	359	633	336	672	303	230	545	194	210	423	372	232	369	321	413	1109	210	333
587	18.6	66	144	469	1771	887	5968	1298	1270	6301	94	1333	8905	7412	2477	599	6019	77	99	12044	1566	384	837	568	399	282	9255	419	439	130	433	555	750	598	477	151	275	483	104	268	394	292	321	232	87	379	1552	211	616
588	18.7	103	86	710	2572	950	4978	392	371	4522	123	1400	6086	6666	4867	139	6682	161	1434	13782	166	345	761	319	266	880	6276	835	322	138	166	199	714	685	379	136	289	320	120	274	296	203	381	449	476	314	1116	261	372
589	18.8	1046	75	548	946	354	6516	132	116	1057	164	669	8226	6861	2003	131	4712	154	1666	748	109	319	596	570	451	707	4401	645	292	253	195	195	954	286	308	89	245	452	210	294	374	221	268	185	375	240	1082	251	494
590	18.9	93	171	78	123	235	6207	108	72	411	76	154	8048	7168	3928	97	1414	330	3202	1558	179	218	636	642	383	533	1229	558	363	98	552	438	1004	400	375	115	399	268	138	225	455	663	219	621	273	201	8475	176	622
591	19	59	1257	119	685	101	2024	96	63	231	111	183	8777	5997	4544	107	639	350	2104	5379	204	292	802	491	483	551	2109	549	425	133	448	258	484	347	342	351	489	314	392	207	367	630	343	534	296	373	1708	168	307
592	19.1	98	1422	1376	1162	56	6098	81	95	365	104	166	6902	8539	4183	435	1602	106	2371	3632	567	274	709	527	354	415	13167	490	326	155	274	453	835	580	678	121	297	932	305	146	361	230	281	559	250	425	841	254	456
593	19.2	78	112	135	109	59	5142	87	78	160	811	487	8049	9119	0	408	1263	93	1412	448	268	311	660	1443	479	484	11628	516	565	261	359	394	843	562	515	147	265	638	161	266	394	579	198	394	498	586	910	147	480
594	19.3	90	85	142	103	57	8184	66	70	90	608	387	7252	7098	0	77	295	131	1612	643	1343	417	777	1486	384	908	8776	636	383	239	266	496	885	427	499	97	373	1129	150	218	488	555	231	545	398	566	1258	283	310
595	19.4	63	110	956	74	77	6449	131	76	81	1379	1413	3949	8493	0	189	983	123	6521	142	1677	478	757	1058	394	1039	5909	437	687	147	252	229	1246	400	767	124	351	271	137	174	456	501	188	448	300	286	1218	453	319
596	19.5	32	123	1584	440	71	6614	402	69	65	1329	623	6254	6097	0	717	152	108	6180	95	520	495	852	1233	625	711	9599	486	643	142	198	272	1152	675	839	223	206	615	128	223	369	655	354	339	122	331	726	219	984
597	19.6	80	81	659	118	85	5193	704	65	128	111	159	8158	11311	0	2016	436	119	7862	62	194	453	848	747	501	1334	7171	603	396	220	243	204	781	374	462	153	320	931	89	219	204	295	220	533	198	395	416	191	429
598	19.7	150	86	987	970	85	6545	1502	64	147	117	324	8594	5666	0	1234	474	87	8307	100	175	134	924	1000	393	760	2115	485	558	127	405	413	919	447	446	140	277	529	128	213	324	264	89	360	306	360	943	155	485
599	19.8	62	67	82	1427	72	951	1723	48	138	92	92	7153	4371	0	4019	1835	98	9618	260	292	133	922	874	461	420	3341	255	310	239	424	398	779	352	720	91	262	282	102	160	261	368	524	641	176	355	718	256	986
600	19.9	73	661	117	575	66	306	206	461	988	100	277	6675	5068	0	5155	1535	178	8866	69	240	184	895	1365	516	725	4471	443	238	124	407	351	606	239	1089	115	567	429	140	173	328	517	260	318	96	391	580	256	956
601	20	115	1315	811	604	89	845	81	477	504	180	134	1552	8874	0	5415	150	91	7865	226	624	400	788	1428	378	1212	11671	397	229	145	611	469	746	452	1014	196	336	733	166	193	320	342	319	255	196	506	485	514	674
602	20.1	335	922	92	91	137	521	61	301	121	472	130	7562	9726	0	5809	91	128	7825	319	437	175	701	997	648	1156	16051	586	332	157	460	357	973	236	606	194	289	549	155	232	402	522	230	462	382	451	785	220	284
603	20.2	189	194	240	108	78	611	73	74	407	259	124	7750	10014	0	6905	1296	112	3977	2262	5010	538	624	1456	993	1623	7003	650	515	313	271	154	822	341	456	211	245	469	156	257	331	500	254	409	356	412	628	124	352
604	20.3	295	212	1720	110	77	158	481	257	1038	123	667	7676	6504	0	4234	2125	106	6889	2108	7387	277	504	869	542	353	15455	724	514	236	405	412	776	403	593	202	381	308	207	228	390	487	88	508	258	486	951	269	387
605	20.4	1004	174	569	546	162	98	152	91	825	110	397	6232	7624	0	5067	486	117	5557	2205	8522	221	742	1692	481	867	8446	634	222	341	476	484	859	703	597	180	267	368	182	161	500	218	242	435	283	475	333	348	556
606	20.5	11608	428	201	892	232	106	106	85	681	76	152	4629	9300	0	4795	934	208	7803	1821	6739	215	774	1489	443	1147	3599	157	552	198	345	529	845	396	868	174	349	732	173	174	534	446	439	179	279	374	634	206	695
607	20.6	14255	81	227	908	80	182	158	98	166	87	183	6752	8253	0	4272	146	178	7231	3058	7436	316	552	1326	307	1088	15902	558	435	192	361	409	904	435	741	136	454	612	189	135	317	623	491	592	273	423	692	181	797
608	20.7	16008	2334	892	1323	261	101	211	227	135	70	189	3166	9170	0	3666	109	182	4284	2134	5558	438	458	1083	343	559	9790	346	326	142	240	172	892	290	477	158	258	602	176	192	428	651	196	412	295	457	712	157	627
609	20.8	12994	1077	106	102	1016	390	239	111	152	142	199	6078	10205	0	3740	992	321	1722	352	4696	295	415	1573	458	225	11637	635	147	114	410	186	1069	354	660	248	351	1265	211	200	358	589	249	317	200	346	487	398	978
610	20.9	1135	102	215	101	567	71	767	68	101	1199	186	6536	10917	0	4591	109	586	979	65	5192	335	345	1293	437	404	19222	610	277	110	230	259	622	634	729	204	379	764	160	217	478	670	238	284	500	432	800	199	610
611	21	1137	371	402	93	122	66	463	122	123	1177	288	4335	10228	0	4272	105	1852	633	93	6620	338	362	2352	385	452	4979	496	376	141	394	405	682	485	366	120	359	330	166	263	436	496	113	467	240	363	473	155	501
612	21.1	76	259	107	616	106	162	538	898	116	799	974	1009	9986	0	2998	606	992	979	228	6338	315	475	1305	481	785	1911	532	227	124	292	347	645	540	530	228	289	199	159	240	372	384	379	394	143	291	480	218	456
613	21.2	58	322	2165	1402	84	89	1466	110	356	75	593	391	9428	0	5126	1065	1286	898	61	4874	315	381	2288	645	662	1342	520	409	105	324	374	571	375	1089	121	202	313	136	236	355	412	364	362	291	239	501	266	646
614	21.3	120	2228	165	326	71	88	637	119	183	65	220	350	7062	0	4210	219	296	194	541	1296	167	442	1057	453	609	6719	402	442	252	344	375	704	461	526	250	324	415	114	138	420	441	214	342	396	447	680	205	575
615	21.4	69	1795	155	95	58	81	106	176	130	100	200	588	5757	0	4673	144	139	137	73	862	233	501	1100	494	664	9762	294	595	114	333	228	842	327	455	196	476	436	161	114	419	385	163	327	306	431	564	311	263
616	21.5	123	627	158	131	63	772	97	69	381	82	175	562	8841	0	4712	1392	377	106	96	139	378	441	663	513	215	14873	552	609	66	484	400	823	485	686	308	241	1064	195	273	355	240	203	237	175	533	492	172	316
617	21.6	80	135	813	130	69	910	94	77	164	90	185	1116	8419	0	2441	1159	185	124	90	3152	300	561	836	476	252	14115	370	922	123	566	321	894	473	587	488	422	1039	239	177	334	227	271	422	145	363	372	223	720
618	21.7	84	108	1234	330	591	1080	133	79	451	75	144	838	6917	0	3703	1561	141	115	81	3478	358	689	1992	289	399	3754	564	649	115	435	476	855	425	602	621	240	963	250	140	303	322	261	220	472	447	743	317	538
619	21.8	100	122	837	1461	650	1386	53	76	1053	143	92	3245	3354	0	3853	1141	151	147	36	3148	384	737	1980	518	446	7303	509	482	133	292	213	855	632	496	625	205	1002	227	240	336	304	158	316	391	511	550	205	514
620	21.9	540	1041	795	499	1193	888	59	61	1013	603	75	2053	4094	0	4376	572	101	393	398	1894	347	771	2022	630	621	7041	250	168	259	356	152	656	480	644	687	447	610	217	325	638	371	135	469	178	531	522	154	733
621	22	607	749	149	103	531	1458	58	197	108	81	76	1317	9982	0	3710	608	106	1443	90	215	313	682	2762	408	722	17773	435	391	166	274	245	701	317	1169	634	322	726	231	220	314	156	415	431	140	426	489	178	646
622	22.1	685	82	776	801	361	663	74	519	87	207	85	551	8612	0	3205	134	229	2555	173	152	304	729	1137	362	553	11112	348	108	89	391	469	761	664	369	624	251	667	195	182	475	254	351	456	154	530	645	199	733
623	22.2	62	78	708	327	815	53	85	207	109	931	47	84	8729	0	4433	99	148	213	92	227	344	770	2819	396	1449	3923	580	644	112	359	318	909	417	642	667	351	315	127	216	273	251	290	180	250	289	792	321	800
624	22.3	65	1508	1820	114	722	56	91	101	127	934	47	78	10475	0	4465	700	283	1781	71	182	228	506	1990	331	750	1084	843	775	217	318	346	639	215	845	605	223	906	193	207	257	176	149	499	171	255	703	273	505
625	22.4	53	1184	1589	95	96	54	109	72	121	724	538	163	10756	0	4558	1276	814	1687	235	218	248	370	2073	666	258	4216	770	452	219	509	417	686	690	1151	622	263	623	186	227	253	246	80	460	319	375	678	217	626
626	22.5	90	263	88	89	142	72	416	92	118	68	1606	291	8393	0	3474	1691	618	1306	186	741	288	449	2312	263	272	8448	591	504	196	746	420	665	313	756	534	219	500	151	187	410	145	185	212	371	329	321	252	689
627	22.6	58	324	324	303	109	60	860	79	101	72	1156	636	7671	0	5427	1283	877	800	100	4743	418	476	1723	220	294	11954	601	343	86	788	219	592	328	985	690	242	871	140	227	499	256	235	713	260	290	510	176	479
628	22.7	78	251	497	156	102	59	135	118	317	61	171	99	4816	0	5498	698	1398	1403	81	4840	425	584	1683	421	295	9153	427	621	141	699	393	1569	329	589	515	438	340	160	235	456	366	357	143	221	290	514	125	844
629	22.8	82	1014	650	119	156	643	126	107	110	105	119	861	8757	0	4827	281	1387	1480	810	2457	419	812	1219	324	1093	2294	290	464	102	648	289	1092	499	600	432	411	674	207	169	309	210	162	416	392	472	244	189	460
630	22.9	121	2348	134	99	78	143	106	464	95	75	131	2072	8249	0	4120	353	252	114	7009	3793	459	810	1865	271	311	14880	365	462	224	494	365	568	555	612	545	281	372	174	164	326	290	312	297	266	1197	584	243	611
631	23	74	1079	137	1241	139	200	118	93	124	73	222	2872	6265	0	4552	330	196	167	21031	4162	476	741	1570	462	532	8404	472	251	270	530	473	589	447	778	290	331	506	237	176	413	132	209	357	262	282	261	212	559
632	23.1	216	133	297	119	143	135	153	246	332	55	212	1194	8875	0	5131	1045	113	83	15521	5772	518	616	1071	558	484	15845	508	386	261	301	281	383	364	1635	459	367	559	148	102	470	147	76	222	368	607	233	307	505
633	23.2	61	134	758	641	717	77	505	122	523	51	210	379	5515	0	5088	264	258	103	10022	5835	341	776	991	454	248	5476	554	213	95	289	280	820	650	565	465	306	660	208	196	412	296	194	459	347	874	517	238	541
634	23.3	49	117	211	1053	133	403	1507	114	997	486	205	228	4223	0	3244	1533	252	111	17192	5123	300	1032	901	497	191	1377	542	490	164	523	223	886	337	414	308	268	563	235	210	380	159	90	471	148	306	339	216	760
635	23.4	61	2695	181	132	157	112	2203	633	791	646	626	49	3249	0	3937	730	191	127	13422	6663	393	904	756	352	207	14947	303	733	206	280	238	747	466	939	481	249	343	182	182	231	152	339	298	147	514	824	162	1259
636	23.5	270	2162	254	91	104	661	1332	622	362	59	1048	75	7510	0	1792	2840	518	84	14106	5910	237	772	2568	503	335	17307	593	912	263	581	309	705	520	597	205	376	545	153	251	336	241	173	290	155	606	446	167	577
637	23.6	422	456	545	86	98	373	893	88	702	95	1306	265	8211	0	848	4291	170	246	2939	5565	354	518	1866	584	412	9913	493	498	244	332	631	1331	543	933	302	405	484	252	278	363	332	257	393	195	371	374	123	700
638	23.7	607	338	128	365	119	835	1070	96	558	72	417	678	4435	0	862	6212	520	2561	16570	5588	499	313	1038	349	646	1348	459	1095	144	236	188	646	525	356	203	517	538	163	270	443	441	199	277	420	506	418	182	663
639	23.8	132	585	124	109	75	371	1794	232	377	76	218	38	1984	0	1903	7299	318	1198	15814	3692	268	455	279	228	871	7857	443	852	151	537	275	823	366	404	247	278	151	202	282	279	431	167	213	210	227	399	211	396
640	23.9	98	1345	242	505	400	299	275	112	103	71	781	2218	1324	0	1544	6687	348	1828	13821	4164	335	430	488	386	855	17293	444	555	129	423	357	773	315	819	296	266	496	214	238	408	339	220	283	254	532	224	148	432
641	24	413	1492	807	973	1255	366	531	294	679	553	629	1941	5188	0	1416	1452	345	563	2113	4211	351	386	1021	407	407	11805	349	499	149	259	211	841	276	491	653	209	263	104	172	895	254	464	209	239	330	315	246	621
642	0.1	864	312	914	2269	565	207	801	569	752	851	159	3792	8521	0	460	948	67	324	847	2516	227	210	319	132	425	2038	197	234	187	380	240	473	435	480	380	342	590	266	151	724	254	350	359	251	354	371	482	553
643	0.2	774	168	561	1335	381	625	1004	57	1373	61	159	1659	7092	0	785	1701	334	69	519	2692	158	257	1062	144	244	2101	181	385	84	232	226	92	346	442	333	263	660	223	159	412	228	190	485	221	422	307	148	712
644	0.3	796	294	65	1738	64	4572	114	55	502	126	449	2456	7904	0	782	1502	134	182	1942	1316	316	268	533	266	146	1264	294	895	218	155	205	99	252	795	247	256	605	140	151	597	288	458	445	225	570	231	250	1009
645	0.4	183	91	200	853	276	4644	250	67	197	146	335	1069	6913	0	679	634	75	680	1269	2707	327	173	427	158	271	3319	414	477	123	207	186	75	274	811	358	209	239	88	159	728	159	294	157	210	452	182	246	636
646	0.5	90	198	995	905	185	776	63	243	107	85	381	782	2572	0	565	1107	73	119	990	2883	312	239	359	288	311	2130	218	1044	191	205	103	97	132	960	350	408	231	178	173	944	288	198	281	296	484	489	248	435
647	0.6	79	100	295	105	92	779	37	70	482	73	54	59	3884	0	75	1037	97	86	624	1018	193	176	343	168	335	1186	487	1086	133	240	175	116	409	1363	325	275	84	145	249	945	284	300	427	262	359	320	229	234
648	0.7	54	81	193	117	61	578	124	71	699	67	46	60	7902	0	169	1167	145	103	69	1702	338	207	342	219	443	1885	241	1064	92	211	139	88	272	495	377	247	147	143	196	543	364	338	226	171	435	252	220	692
649	0.8	78	86	140	101	114	1228	74	66	619	79	81	52	7060	0	69	678	91	125	66	1580	468	153	304	251	425	3165	642	1204	164	349	265	116	251	922	263	208	206	105	166	169	125	288	141	249	313	155	277	918
650	0.9	59	373	95	82	85	159	299	101	546	144	78	123	10103	0	88	1172	44	100	71	877	466	186	436	239	200	3660	440	1052	73	255	188	129	322	1214	250	219	186	71	136	236	156	324	135	217	283	244	180	1134
651	1	49	581	657	77	59	106	89	67	557	56	94	65	3575	0	220	620	48	94	66	1121	452	226	278	244	204	3164	360	704	135	243	243	130	352	1102	159	268	171	73	146	203	138	151	318	113	316	195	178	606
652	1.1	72	1186	107	91	208	130	188	118	861	155	53	143	5756	0	111	57	73	74	74	1518	237	178	567	115	198	2724	260	557	91	243	306	122	296	482	204	221	191	51	186	466	208	177	239	104	184	332	119	752
653	1.2	77	595	90	85	93	76	62	81	229	74	76	92	2985	0	207	176	80	365	78	1156	258	128	767	323	172	1367	226	368	163	159	125	127	180	675	196	256	207	156	213	771	213	387	411	234	304	105	394	730
654	1.3	67	111	81	68	73	81	143	77	700	176	64	229	2927	0	63	314	139	93	351	1365	343	166	753	168	246	2463	312	666	232	153	151	177	59	1270	395	332	328	122	198	690	132	364	271	121	317	149	216	399
655	1.4	70	60	677	89	129	41	50	37	227	84	116	638	2318	0	99	69	130	99	101	1288	124	178	245	375	121	2447	355	273	255	139	204	180	261	1338	428	310	404	161	179	1054	203	299	296	210	189	235	250	502
656	1.5	49	99	110	55	81	166	71	61	643	111	76	1440	7749	0	81	71	104	81	534	1195	160	143	487	175	166	5615	259	914	158	240	91	163	486	432	208	272	649	102	177	844	190	281	104	215	300	353	261	579
657	1.6	63	124	66	118	70	149	410	25	778	111	95	2338	9538	0	84	59	126	105	1365	1302	240	132	634	171	217	2886	376	814	199	299	189	177	247	365	205	221	502	105	230	466	213	347	365	161	268	146	320	587
658	1.7	70	435	77	100	99	90	79	42	403	77	61	1421	9776	0	76	52	146	76	2471	1275	177	133	542	217	413	1400	235	870	114	437	213	179	284	258	2267	270	258	60	187	849	138	152	296	185	183	264	318	755
659	1.8	102	87	68	104	56	204	186	136	445	67	257	63	10728	0	268	55	151	72	637	1211	274	212	444	227	355	3399	440	879	127	168	157	260	407	530	1210	277	742	98	230	880	196	76	227	112	320	369	140	688
660	1.9	96	68	865	75	76	180	92	85	779	37	97	74	7013	0	110	69	129	545	1126	1341	251	177	396	191	374	5796	427	1147	310	387	336	324	290	1472	1149	185	210	131	100	292	146	93	337	152	237	151	189	943
661	2	157	133	561	93	72	689	361	180	607	105	70	73	1636	0	181	49	178	94	939	524	349	258	242	425	305	2200	320	1296	189	383	253	139	432	886	856	241	154	130	216	503	219	379	87	119	230	302	259	734
662	2.1	49	112	70	102	90	1851	889	669	990	1064	320	109	5958	0	180	46	113	335	88	301	145	296	624	209	305	1407	394	763	151	201	211	116	115	1465	342	229	279	124	230	725	133	563	81	196	191	170	222	804
663	2.2	61	75	58	95	59	1487	64	384	1296	257	149	90	4317	0	113	87	146	108	92	95	83	143	586	278	395	2405	228	800	170	259	200	115	116	562	2412	197	771	121	209	301	191	54	118	177	292	165	239	613
664	2.3	95	268	113	105	103	129	283	99	686	98	136	109	811	0	73	95	120	56	81	67	178	182	228	193	325	5181	255	751	97	282	201	141	372	327	414	327	243	96	152	558	194	308	105	205	236	149	217	426
665	2.4	95	155	85	103	141	108	223	96	152	82	123	83	2821	0	55	76	160	38	60	59	201	157	314	176	356	2582	316	498	72	201	110	209	313	372	1871	243	176	82	230	286	314	268	362	80	430	253	202	537
666	2.5	75	134	77	91	100	73	147	98	705	85	163	126	1881	0	69	62	182	91	73	92	189	252	354	307	240	2153	483	875	92	328	293	272	236	1247	134	215	217	77	132	569	361	495	220	233	388	152	412	713
667	2.6	43	99	77	65	84	84	79	102	381	72	398	95	2283	0	59	45	140	78	37	68	200	228	573	206	223	1094	464	1055	273	1232	117	194	224	645	230	222	267	77	117	741	204	148	212	201	335	188	223	943
668	2.7	56	144	524	81	92	210	66	69	247	59	50	90	5113	0	92	97	219	73	66	77	136	217	653	176	254	4305	452	976	224	91	102	209	302	298	283	224	203	96	185	532	211	367	126	251	153	223	271	608
669	2.8	122	286	132	77	141	218	108	45	997	69	69	141	4396	0	350	83	382	88	580	77	326	181	534	260	192	8906	386	587	159	297	212	171	216	226	254	278	256	210	132	479	290	219	148	372	445	148	317	571
670	2.9	57	448	242	96	97	97	137	67	369	53	109	74	1708	0	273	65	357	62	173	70	329	232	276	335	285	8075	303	765	99	143	211	206	256	278	338	259	349	125	250	332	243	374	94	167	335	239	300	752
671	3	77	277	767	87	61	93	145	123	121	69	211	109	5199	0	90	315	347	181	97	467	197	190	683	244	330	3071	374	663	283	180	212	194	448	232	500	246	256	159	177	385	261	220	237	268	365	309	410	450
672	3.1	635	110	121	400	131	76	365	85	422	157	60	64	4585	0	69	524	179	360	85	1433	458	190	301	266	299	2586	227	1124	270	320	72	176	277	236	2765	303	370	102	228	466	286	566	373	167	408	98	379	566
673	3.2	129	204	151	895	210	64	376	90	159	75	96	107	2784	0	299	72	94	389	148	137	363	260	613	395	576	3511	284	846	193	240	192	188	239	198	822	178	280	179	199	414	304	294	184	251	339	280	246	821
674	3.3	65	153	131	1171	462	277	466	464	153	79	48	414	2738	0	64	147	143	1711	85	55	363	273	1056	464	336	1474	313	548	245	722	157	225	251	304	335	153	460	119	192	228	441	101	50	189	300	227	222	505
675	3.4	44	106	117	1492	344	114	356	1200	98	81	97	662	3255	0	54	297	66	924	63	78	406	178	1042	242	231	3002	423	770	199	448	230	244	171	114	3083	307	362	146	214	518	254	335	210	183	271	227	104	806
676	3.5	45	114	122	656	57	1147	123	580	567	62	75	384	1503	0	67	68	85	2073	95	91	212	123	724	321	262	10648	436	775	150	272	106	155	145	151	2122	169	216	135	137	141	131	130	606	257	345	154	197	674
677	3.6	109	92	650	192	64	1060	69	104	877	88	158	307	2745	0	54	89	96	536	80	115	222	225	329	199	176	2243	362	282	124	300	237	140	302	238	2337	274	204	157	118	375	146	176	408	151	482	164	431	596
678	3.7	60	106	81	124	54	912	60	64	582	86	152	222	2524	0	71	59	89	205	76	107	154	174	237	183	193	1628	350	458	115	142	85	209	149	136	2027	233	136	292	156	300	150	481	108	130	322	158	198	578
679	3.8	35	364	79	57	55	761	82	75	177	208	482	464	2327	0	75	74	97	127	74	80	192	248	380	298	358	1725	301	887	131	286	153	208	231	163	1607	228	140	96	174	444	171	185	819	400	268	224	325	685
680	3.9	76	2071	89	83	145	1698	306	55	108	768	292	968	2374	0	88	84	199	181	82	98	216	182	651	170	430	3763	296	666	213	266	114	116	266	192	379	290	146	93	141	344	244	59	575	289	346	237	239	431
681	4	73	1179	83	312	39	87	99	66	85	810	303	1085	819	0	64	114	256	671	77	378	202	186	892	252	516	4471	273	430	193	239	254	161	350	341	202	303	463	89	157	318	391	252	310	179	453	150	208	1339
682	4.1	73	207	971	92	42	75	90	35	96	1105	279	2768	1614	0	48	79	121	129	60	388	253	246	1026	138	175	1450	320	566	156	795	200	126	138	232	295	152	352	123	195	557	225	191	272	246	382	289	193	1243
683	4.2	58	116	518	101	75	47	208	78	96	1039	303	1492	2314	0	129	73	127	103	442	66	188	141	1117	289	139	4941	478	422	131	680	236	165	142	216	375	230	293	109	173	665	310	155	263	287	278	180	253	639
684	4.3	61	126	243	59	134	204	705	106	95	508	267	654	631	0	828	86	85	82	107	411	155	176	574	392	183	2852	278	325	181	499	187	209	358	142	318	220	336	207	164	325	149	245	189	197	477	311	369	494
685	4.4	61	126	172	61	68	127	398	180	120	196	854	99	1000	0	663	171	37	59	102	55	212	183	901	223	196	2179	435	643	199	267	127	118	236	176	604	334	202	147	254	289	437	279	200	110	454	194	185	506
686	4.5	48	70	108	74	58	117	347	102	128	201	496	59	878	0	1230	80	75	111	104	82	194	216	1280	427	235	3583	349	337	152	371	93	148	155	268	653	217	339	154	296	381	318	203	269	242	231	249	305	558
687	4.6	62	306	126	100	280	119	1083	87	122	78	435	53	656	0	1193	77	61	54	90	71	153	219	354	226	308	4082	490	399	122	287	233	135	188	169	2283	193	418	210	114	192	291	145	592	376	194	184	251	444
688	4.7	101	117	74	87	84	479	973	58	90	83	197	337	117	0	336	99	77	65	67	210	122	216	459	237	388	4425	412	281	228	256	242	144	263	283	505	230	478	178	135	337	292	355	204	153	252	275	285	866
689	4.8	107	73	630	99	167	1044	606	62	70	69	335	128	234	0	76	678	95	311	695	125	162	255	608	375	396	3730	426	322	290	106	142	141	241	205	1798	215	144	126	128	269	283	221	231	276	234	139	315	854
690	4.9	48	39	1463	94	83	2440	512	60	96	73	278	136	382	0	95	766	280	82	1173	1763	178	277	734	245	245	1688	384	554	114	442	187	140	252	179	509	242	498	118	176	237	227	373	422	225	278	355	388	795
691	5	50	87	1036	150	73	4757	576	51	79	75	178	159	306	0	103	976	311	82	2047	72	135	228	400	274	348	3321	361	611	122	316	177	147	301	243	342	208	928	163	167	316	255	166	319	133	268	468	261	1084
692	5.1	63	59	1877	97	86	6181	80	54	99	60	273	149	298	0	68	973	174	74	2053	169	156	321	1065	216	314	2696	336	447	155	407	98	134	288	139	313	273	1490	136	175	384	273	245	189	298	435	317	163	732
693	5.2	37	61	1252	106	85	5433	67	133	137	107	69	101	1339	0	62	689	778	92	249	81	151	214	840	280	317	2508	327	736	239	343	89	160	95	320	1010	278	2570	149	220	466	197	216	83	234	448	250	187	828
694	5.3	47	65	285	86	109	6024	58	75	385	59	60	104	3857	0	48	980	400	365	79	467	168	253	457	375	215	6698	400	624	143	155	197	138	274	257	2181	291	2751	141	172	341	235	223	118	201	383	270	157	552
695	5.4	65	73	375	80	122	4318	77	63	114	72	173	86	4103	0	76	1179	71	122	55	437	183	239	625	401	225	2014	370	896	117	204	276	246	192	200	295	316	395	301	313	361	382	97	408	269	420	197	297	907
696	5.5	145	48	57	71	123	311	58	60	119	62	146	56	148	0	177	889	97	935	82	374	165	169	304	266	233	1682	434	649	107	288	236	199	242	120	186	231	230	131	187	296	220	142	425	276	458	309	205	638
697	5.6	65	605	63	139	93	103	132	303	143	71	232	157	279	0	79	562	120	1052	621	563	237	236	1362	191	244	5500	472	184	127	164	250	136	150	71	281	264	280	170	202	171	131	302	531	182	570	246	131	780
698	5.7	43	2565	97	805	53	73	83	762	118	589	360	537	97	0	392	322	86	120	443	65	150	397	371	240	183	5202	566	276	105	147	242	294	313	182	485	295	184	194	163	186	141	89	454	192	356	285	147	836
699	5.8	45	1572	73	858	112	79	119	407	79	439	121	618	192	0	104	65	72	426	97	94	174	204	793	221	216	2718	260	879	264	308	170	143	187	373	383	356	540	158	238	396	148	404	193	217	373	355	217	620
700	5.9	35	1293	632	84	41	101	68	140	81	77	118	1261	136	0	148	85	157	85	205	431	256	224	574	244	202	1680	410	759	143	219	175	199	359	345	304	214	552	183	174	671	154	212	109	125	331	275	262	1201
701	6	153	605	968	81	60	84	95	78	118	67	144	1090	82	0	116	303	140	92	47	449	209	269	375	214	190	4855	339	898	129	266	167	149	221	238	398	314	394	238	233	249	297	348	355	133	285	253	274	620
702	6.1	100	189	518	72	79	97	102	62	61	57	231	146	646	0	63	83	292	98	63	73	212	185	643	208	300	2290	326	1142	164	283	115	285	212	80	316	205	363	169	177	632	233	264	491	254	241	249	440	854
703	6.2	72	139	69	77	99	187	78	57	63	29	114	134	1044	0	104	70	113	155	76	101	178	240	604	208	343	2151	231	986	168	147	106	159	185	118	479	271	330	159	188	819	219	176	235	130	499	162	194	827
704	6.3	130	95	102	363	172	75	52	46	100	48	127	78	2135	0	93	83	64	90	52	62	180	375	916	159	360	2071	311	818	236	325	148	148	187	189	216	140	228	102	178	337	353	153	161	420	378	212	289	848
705	6.4	76	298	48	749	558	68	73	59	208	71	276	54	1980	0	486	147	73	60	53	85	294	166	630	340	391	5398	443	808	300	281	237	143	296	195	197	118	241	86	186	194	158	114	299	116	326	368	225	570
706	6.5	58	1609	77	612	551	253	111	31	884	57	508	191	1253	0	643	80	109	283	45	62	186	184	1495	379	315	2207	270	323	89	450	258	165	267	130	100	213	234	74	172	268	105	188	137	62	258	163	255	403
707	6.6	58	1519	65	90	357	95	56	44	1466	42	140	189	974	0	820	137	132	123	64	68	181	224	1448	284	657	2399	308	377	166	379	226	200	311	167	138	150	137	205	190	436	216	130	219	84	468	98	244	653
708	6.7	65	272	119	88	69	93	29	70	1012	44	292	81	708	0	469	348	208	138	989	443	264	293	838	188	289	2947	369	591	68	336	144	412	215	182	406	218	197	119	227	307	148	241	237	238	401	216	227	539
709	6.8	284	142	519	88	65	69	68	57	263	40	108	194	144	0	119	157	352	455	90	243	228	306	541	360	235	4933	286	496	183	155	167	762	173	244	783	148	324	97	185	511	206	450	490	329	575	337	331	746
710	6.9	424	69	669	117	172	671	44	66	104	49	130	433	70	0	109	273	1096	148	106	902	119	265	243	176	268	2383	263	603	150	374	98	461	174	115	860	98	299	105	165	772	338	146	640	225	457	177	633	504
711	7	778	64	74	99	71	1845	55	67	120	54	191	959	74	0	72	186	624	338	105	190	145	238	223	181	324	824	355	165	127	173	178	337	141	355	381	282	193	148	273	576	213	202	263	254	348	194	415	583
712	7.1	105	144	53	91	69	1528	69	44	191	96	294	649	135	0	255	708	118	731	80	114	217	192	343	179	224	3388	373	388	227	457	164	272	207	316	264	307	432	155	207	376	224	168	181	126	314	216	305	1343
713	7.2	85	149	128	104	94	637	81	30	98	76	230	2352	307	0	208	929	143	1803	115	61	156	322	608	284	392	2198	293	811	240	94	197	515	296	142	259	211	354	125	248	193	142	134	450	197	359	246	177	531
714	7.3	53	109	46	103	111	66	115	97	265	57	61	3470	624	0	57	796	76	1377	668	55	221	191	682	168	294	1937	291	858	153	137	125	230	171	116	289	321	98	139	215	182	316	316	163	122	384	238	281	568
715	7.4	62	63	45	90	107	78	83	37	888	53	267	1041	1384	0	43	435	52	339	846	56	313	234	409	280	338	3279	532	377	79	253	160	133	338	132	300	200	183	137	141	474	186	169	214	172	332	383	173	509
716	7.5	63	705	65	505	75	57	320	43	622	45	222	465	458	0	78	115	55	461	1013	409	226	142	486	145	295	931	440	208	145	315	205	104	231	227	347	218	73	117	183	224	139	112	160	192	268	206	160	538
717	7.6	27	1140	366	602	60	212	1210	38	258	68	152	376	60	0	56	74	163	176	145	1259	190	174	531	304	327	533	245	151	115	303	128	143	241	265	434	147	102	158	169	170	369	167	267	103	337	331	250	619
718	7.7	35	101	101	1246	261	102	925	40	303	68	239	84	813	0	67	71	90	171	251	831	204	183	403	311	365	1540	178	316	162	113	91	121	239	122	263	266	318	268	165	557	333	149	111	228	391	270	314	698
719	7.8	51	155	652	488	174	63	131	49	115	56	642	64	1071	0	64	136	80	85	101	1484	215	205	369	207	262	4481	290	290	217	106	172	122	143	112	171	245	323	153	156	469	364	278	351	285	326	192	219	1039
720	7.9	50	135	92	206	81	116	77	60	130	409	508	65	2402	0	730	327	59	77	97	1772	270	202	990	140	355	4694	239	280	224	106	225	156	152	110	397	282	269	160	193	397	391	158	94	172	243	234	406	909
721	8	36	144	87	64	65	69	88	120	226	76	413	72	426	0	970	134	75	71	108	118	292	153	1212	131	444	715	390	345	176	150	252	174	276	96	293	209	260	137	263	645	295	161	110	93	284	358	408	1151
722	8.1	30	160	113	70	84	71	103	96	295	231	346	56	114	0	1164	84	709	81	93	470	234	468	935	293	324	3270	358	489	105	92	98	590	269	299	385	156	778	192	186	495	289	204	176	255	399	247	375	737
723	8.2	22	106	132	91	72	143	179	109	94	785	254	352	38	0	707	142	202	391	286	85	214	512	674	313	294	1361	308	530	122	124	140	406	184	158	404	222	607	127	280	359	230	189	150	98	431	260	386	1239
724	8.3	90	1101	468	75	56	56	119	120	98	558	241	115	58	0	1910	88	88	252	309	86	248	462	1191	318	244	881	175	656	182	279	231	710	202	314	276	250	244	114	278	650	411	257	346	85	356	186	281	1328
725	8.4	57	1091	842	54	55	159	201	58	82	100	34	91	58	0	1167	441	92	280	137	88	265	329	1012	426	263	415	329	852	174	169	136	795	166	161	228	473	205	165	275	604	329	144	357	303	493	263	213	794
726	8.5	66	2086	920	588	56	657	1268	397	89	113	49	247	143	0	73	857	99	847	726	343	123	394	1891	247	509	3422	172	319	262	285	178	590	201	118	317	122	440	111	226	336	179	120	117	273	298	195	390	738
727	8.6	147	610	336	74	51	2167	702	1115	78	400	33	427	1031	0	88	526	70	198	90	1364	191	527	921	288	696	6412	300	277	196	142	171	458	163	206	195	92	359	83	104	500	196	105	279	150	296	265	259	1063
728	8.7	33	102	193	104	61	520	977	600	68	359	127	462	322	0	57	417	70	100	65	464	201	219	975	299	275	2409	221	236	220	135	267	381	214	97	96	139	298	121	164	447	156	93	98	230	271	297	244	432
729	8.8	66	61	211	70	61	399	356	421	85	361	71	354	353	0	107	68	77	89	55	763	160	393	257	254	330	1062	311	297	230	513	241	735	202	194	97	253	404	122	171	350	160	314	223	135	261	215	524	335
730	8.9	149	49	55	91	49	104	389	92	91	62	48	345	327	0	64	69	151	132	72	610	160	286	272	165	351	3770	218	439	252	355	132	626	203	288	173	156	347	140	133	336	103	294	317	147	283	334	511	733
731	9	184	45	56	67	70	79	104	92	96	63	198	656	52	0	59	79	84	403	62	654	239	361	258	291	344	2274	296	575	106	250	105	450	161	286	227	204	531	173	177	823	147	336	260	188	417	221	389	1087
732	9.1	326	164	57	81	56	77	92	50	106	57	452	194	67	0	81	50	66	65	40	506	360	327	278	525	387	2003	346	1147	93	155	144	570	165	319	267	365	228	161	160	439	170	80	421	241	386	342	305	514
733	9.2	143	277	74	62	52	94	38	55	244	120	224	718	45	0	376	55	206	86	90	111	366	327	374	273	311	2078	315	901	147	479	195	266	223	126	220	225	620	158	219	394	94	64	71	262	341	190	329	815
734	9.3	55	97	61	136	68	103	250	39	793	39	190	1004	431	0	348	95	75	82	88	593	384	233	1157	185	500	629	396	1106	175	771	195	207	183	147	169	181	824	97	153	245	114	142	378	108	343	213	157	291
735	9.4	33	286	54	282	78	86	75	168	1875	53	171	1412	714	0	77	59	82	95	266	61	252	257	909	281	445	4565	424	540	137	1235	148	198	166	277	226	256	257	158	302	427	114	121	318	117	284	339	275	547
736	9.5	60	1870	36	95	140	49	71	88	296	46	119	981	166	0	1673	103	110	48	124	894	297	288	690	181	245	2166	340	153	115	177	248	175	253	320	300	121	271	160	139	269	88	107	407	156	217	144	246	691
737	9.6	58	388	38	203	533	1011	84	61	101	65	105	336	99	0	964	320	122	121	93	530	189	285	1409	124	240	1228	416	314	231	179	139	184	202	172	170	126	342	119	127	491	144	207	485	213	301	214	147	774
738	9.7	63	231	42	575	722	744	46	57	390	196	78	75	140	0	718	188	123	73	79	481	227	321	681	341	252	3209	392	452	261	164	117	144	218	124	156	287	169	88	262	730	260	382	244	257	347	311	182	1377
739	9.8	37	220	82	404	841	560	72	41	118	65	56	76	194	0	91	74	70	67	44	97	209	216	1415	179	332	3038	297	266	113	259	205	125	163	225	363	222	645	126	110	502	284	89	409	161	308	199	177	886
740	9.9	15	187	1120	316	597	231	56	95	127	48	90	108	111	0	72	93	135	96	80	134	173	239	773	208	280	2465	460	826	131	213	114	139	169	254	237	386	303	101	159	535	298	212	178	109	373	230	316	648
741	10	43	169	312	82	65	357	71	30	80	124	65	46	108	0	77	511	756	359	65	575	263	295	1275	281	187	4514	294	413	107	206	141	323	177	119	358	280	379	140	133	359	265	393	368	78	366	199	209	913
742	10.1	63	155	472	99	72	164	44	58	77	54	70	52	357	0	121	274	497	441	301	1339	241	256	534	231	210	2162	302	760	198	485	173	161	200	296	374	270	208	311	223	345	359	568	272	226	334	228	469	1028
743	10.2	78	95	71	93	49	56	68	66	85	34	526	34	98	0	884	201	275	347	1216	389	169	401	500	194	482	1702	422	906	187	334	157	171	414	236	276	318	226	116	168	216	322	181	221	308	308	293	214	279
744	10.3	54	283	313	105	213	103	243	190	272	204	661	78	200	0	1049	88	538	1422	248	561	203	316	1110	142	378	2877	340	1242	148	371	249	108	191	327	247	189	184	95	213	245	274	128	212	317	311	250	328	459
745	10.4	43	542	81	137	79	80	230	406	306	59	634	67	395	0	381	87	770	1071	67	39	162	233	521	258	566	2945	297	481	86	250	215	125	163	160	160	291	210	125	203	301	241	377	149	214	184	341	168	449
746	10.5	34	2320	416	105	61	77	1322	361	244	52	465	148	629	0	363	73	82	130	68	556	154	305	1132	463	289	2443	389	468	190	251	124	169	247	110	330	348	188	168	164	172	317	152	162	134	373	207	181	341
747	10.6	46	146	100	472	52	51	989	73	101	86	169	407	943	0	196	91	82	91	80	310	158	291	313	180	239	2872	315	408	274	125	170	128	171	249	264	94	490	161	185	244	295	143	461	223	292	240	367	591
748	10.7	39	126	91	783	59	121	782	76	99	186	286	529	1676	0	62	70	108	81	93	361	170	269	1194	164	428	1993	504	228	162	131	200	171	174	261	302	237	265	178	245	151	403	154	152	343	217	163	335	374
749	10.8	77	103	67	75	54	54	540	80	261	49	203	1509	542	0	61	65	86	128	67	60	183	428	589	315	377	5407	467	171	74	82	312	84	305	184	448	329	192	341	97	168	355	148	129	147	301	278	280	1070
750	10.9	279	106	63	101	57	79	625	114	107	74	204	2660	44	0	62	94	117	504	86	86	138	380	1379	192	197	1784	512	630	175	138	82	366	228	154	1652	289	527	261	250	172	261	230	600	303	393	323	300	812
751	11	524	407	78	63	102	64	95	92	107	68	313	2349	69	0	183	189	127	379	78	331	180	301	825	304	211	7128	490	630	249	227	161	102	195	181	347	256	492	217	148	403	337	365	497	268	300	255	540	1068
752	11.1	560	106	1192	74	125	33	81	56	225	326	120	622	129	0	66	439	97	1258	52	92	261	195	606	280	248	2193	363	121	192	314	119	308	223	164	198	309	552	130	177	326	180	212	391	213	466	174	609	1015
753	11.2	90	84	1101	78	258	70	97	30	98	1001	65	70	83	0	70	85	219	125	89	264	216	234	1096	370	255	1604	445	923	108	403	81	276	212	120	427	253	447	158	287	317	221	200	354	163	251	111	229	796
754	11.3	64	73	197	74	98	466	58	197	92	381	97	151	86	0	83	718	640	98	122	885	345	333	662	486	335	2893	453	693	78	228	204	206	297	146	1031	360	448	190	154	275	306	115	243	75	315	213	124	1056
755	11.4	79	57	572	287	95	669	60	890	363	47	597	134	91	0	56	446	641	114	424	504	178	235	1420	311	451	1329	347	441	98	217	201	129	230	193	332	413	466	122	260	265	280	127	291	116	313	220	204	596
756	11.5	56	73	169	97	76	627	403	519	244	62	158	135	96	0	73	801	291	70	182	1387	173	201	1014	353	462	5735	282	688	121	240	228	125	178	146	236	197	474	122	227	372	268	497	390	139	273	335	146	804
757	11.6	73	50	103	739	97	172	92	91	93	118	88	73	591	0	81	69	94	141	47	927	210	266	695	331	389	2871	358	431	295	479	265	114	234	318	224	362	435	133	138	216	321	201	166	343	266	304	288	892
758	11.7	24	143	50	893	151	1073	59	150	106	68	110	62	390	0	43	64	195	416	60	211	215	290	520	203	430	981	256	788	200	572	216	128	186	313	300	364	324	143	269	229	264	106	104	220	298	345	197	1706
759	11.8	33	147	68	441	65	2126	84	78	128	82	185	138	71	0	376	74	107	124	56	156	275	193	575	156	450	2209	244	819	182	414	96	137	158	183	322	297	267	208	255	559	204	180	436	242	344	374	226	977
760	11.9	42	232	74	285	87	2638	51	70	86	61	89	68	88	0	97	105	64	507	80	485	252	298	557	258	771	2076	289	964	131	1825	190	108	252	217	235	414	358	138	169	320	217	289	383	287	471	119	475	897
761	12	52	481	72	75	94	265	33	65	127	56	286	70	68	0	87	290	76	927	515	112	229	245	1073	237	552	1709	346	363	121	2078	212	133	173	207	278	414	338	126	176	163	241	355	332	129	404	178	269	1405
762	12.1	82	1865	182	52	336	135	66	67	72	49	286	70	68	0	87	290	76	927	515	112	215	356	1022	148	588	1086	357	1081	112	938	150	314	255	197	278	414	338	126	176	163	241	355	332	129	404	178	269	1405
763	12.2	64	1365	77	63	75	104	92	66	81	203	244	499	740	1860	112	175	189	284	78	435	320	239	1254	205	511	1700	339	978	198	389	202	257	279	167	2055	299	246	56	162	335	195	204	266	196	179	453	233	445
764	12.3	204	480	144	82	62	81	51	173	108	73	244	499	740	1860	112	175	189	284	78	435	244	205	364	166	340	4458	244	228	178	194	296	129	184	322	2055	299	246	56	162	335	195	204	266	196	179	453	233	445
765	12.4	339	76	151	80	74	53	33	72	132	59	200	749	831	1742	170	134	280	361	69	125	284	225	544	304	278	1517	158	342	313	228	93	173	172	283	253	209	380	95	152	222	297	85	408	287	231	305	148	309
766	12.5	40	66	120	73	69	55	290	117	85	73	232	91	677	1919	63	583	171	492	70	393	386	227	590	166	505	1169	449	337	218	331	170	179	122	72	313	316	366	132	240	349	238	287	389	224	237	279	269	536
767	12.6	27	56	90	59	73	71	285	51	93	205	323	144	642	1742	208	134	95	126	108	1184	242	247	870	211	487	1753	359	179	204	172	237	137	255	312	229	450	299	160	133	171	211	317	555	58	229	215	649	640
768	12.7	45	71	682	42	37	46	78	68	86	981	55	318	102	1619	804	320	191	137	242	648	256	212	887	137	533	1419	192	618	224	166	159	179	194	139	217	444	346	182	175	227	245	169	210	228	202	169	713	741
769	12.8	156	72	86	35	75	251	67	67	96	846	133	214	91	1167	513	69	120	336	58	109	229	175	966	277	522	2108	297	204	158	185	250	113	226	193	107	372	265	106	104	203	180	277	211	267	377	236	592	364
770	12.9	64	86	117	274	282	578	99	75	658	402	98	127	151	695	148	77	220	95	63	94	237	195	371	181	624	1196	310	221	196	243	107	107	215	162	393	213	319	127	239	298	231	254	441	107	366	271	472	655
771	13	82	111	151	96	293	224	392	103	764	80	70	115	98	1485	228	62	488	699	62	72	327	263	216	198	508	1714	288	494	218	123	199	184	138	292	191	276	406	78	206	177	156	75	280	223	304	139	363	378
772	13.1	47	85	589	274	363	174	973	71	486	66	43	114	127	635	72	82	183	948	61	57	146	292	270	94	430	502	188	699	178	243	155	397	202	154	133	220	416	55	211	311	264	86	321	144	369	223	458	574
773	13.2	71	373	158	98	269	539	1382	73	845	58	38	127	75	1002	68	213	100	876	54	142	363	247	382	233	458	3833	359	881	141	348	102	318	144	209	133	171	376	87	134	357	256	176	231	163	233	255	262	604
774	13.3	63	107	395	90	159	140	446	67	1121	69	122	105	74	154	193	964	70	189	74	82	311	278	405	425	448	3697	410	648	213	230	213	297	267	187	171	173	424	74	198	256	398	266	199	91	225	414	345	622
775	13.4	131	74	1368	98	74	94	112	129	348	68	107	117	90	109	83	1736	117	95	68	212	370	252	269	322	513	988	402	366	110	376	184	208	269	287	246	238	634	110	174	176	197	254	127	119	275	145	416	287
776	13.5	55	75	101	258	54	88	98	125	277	68	133	93	57	128	70	606	93	87	72	316	151	214	290	422	592	1884	139	216	130	156	150	202	173	250	263	294	574	61	204	308	355	361	282	152	291	344	918	685
777	13.6	74	93	397	238	204	80	107	78	102	188	94	72	87	123	69	93	162	76	80	81	186	168	434	162	599	1861	241	466	192	241	221	217	188	203	289	125	399	78	229	151	271	322	420	269	233	434	585	476
778	13.7	42	68	266	171	153	66	63	81	100	66	95	231	397	128	104	453	57	144	82	396	248	218	561	272	419	1410	293	571	96	197	161	187	215	300	297	321	482	127	244	196	165	316	381	107	251	148	927	364
779	13.8	47	58	68	63	68	51	73	65	85	54	282	318	1300	181	617	420	52	1194	548	129	160	280	505	401	339	1619	448	676	199	209	251	120	114	249	215	223	460	109	228	212	271	205	170	110	295	185	331	580
780	13.9	38	61	69	84	81	25	89	182	74	40	64	776	581	145	72	604	185	541	1202	75	291	283	655	229	312	1054	213	485	161	150	221	108	148	155	290	216	222	95	205	213	391	270	151	151	149	199	277	341
781	14	85	532	70	95	95	127	87	94	78	103	42	413	339	125	83	126	215	637	137	158	155	166	884	250	273	345	329	384	164	147	61	166	181	145	269	157	210	104	162	159	241	377	461	138	285	227	184	430
782	14.1	149	830	111	345	65	112	76	732	90	65	79	84	44	96	103	77	104	100	431	891	186	163	755	175	414	278	358	649	140	272	165	186	302	217	330	219	208	102	281	149	162	335	313	183	266	180	243	465
783	14.2	305	1152	70	655	89	189	148	909	212	67	50	66	119	97	95	110	85	234	89	408	320	224	327	92	405	310	246	670	175	185	215	357	173	148	224	105	377	83	158	194	279	216	192	279	315	182	315	209
784	14.3	440	423	61	3058	82	446	74	722	388	71	85	80	298	609	182	385	64	290	57	54	144	219	1169	63	665	2322	412	536	137	363	130	158	128	95	144	154	330	85	246	302	281	312	246	190	206	216	249	544
785	14.4	83	70	60	1171	74	143	549	148	98	58	71	183	305	667	85	580	127	293	84	63	307	254	1118	120	820	1814	274	380	128	409	172	81	175	321	261	343	518	139	228	252	232	218	293	238	183	256	333	735
786	14.5	114	65	744	79	311	260	412	72	154	242	82	83	100	108	58	441	98	67	80	77	218	197	2293	104	521	1432	333	247	144	343	272	142	134	142	246	377	479	142	199	203	183	178	384	138	223	175	268	521
787	14.6	58	66	128	1215	66	419	774	70	428	76	57	110	86	617	64	62	209	113	62	509	344	221	542	291	832	1633	637	421	139	179	184	191	215	324	508	366	370	136	253	147	251	203	575	73	256	198	262	358
788	14.7	66	68	121	307	79	119	1108	116	176	53	145	130	63	313	71	76	132	410	91	797	291	288	726	131	851	1308	552	338	229	347	210	155	227	132	415	227	258	127	198	276	158	326	329	89	315	240	164	389
789	14.8	96	308	106	90	86	83	108	70	229	262	886	575	52	207	68	58	135	467	94	365	219	245	1087	229	608	954	466	440	81	531	138	181	170	99	220	133	219	82	152	174	193	130	236	301	347	175	255	481
790	14.9	80	198	61	84	49	71	57	62	662	72	460	195	75	84	48	95	132	123	418	310	378	221	816	388	614	2681	270	293	87	385	180	148	263	147	264	196	274	120	132	139	190	113	91	244	272	191	275	309
791	15	68	349	1042	79	40	118	57	75	295	65	110	116	76	330	48	219	112	123	522	121	315	339	1518	138	690	1569	324	366	186	917	230	186	211	173	225	356	238	107	110	175	180	71	115	202	334	137	165	304
792	15.1	91	360	160	82	63	87	77	44	392	62	405	141	485	116	68	174	175	210	171	552	310	213	572	163	494	988	428	280	136	495	157	149	270	186	221	324	277	169	117	242	155	191	346	89	284	211	142	344
793	15.2	78	108	243	412	51	135	101	76	243	51	292	100	1463	114	69	79	100	102	90	633	259	158	800	234	353	1543	465	474	183	253	189	152	197	231	193	182	476	214	102	290	295	79	644	95	262	224	156	373
794	15.3	61	100	493	97	58	127	309	60	326	67	45	98	665	64	119	121	91	463	62	503	239	201	1926	79	593	894	347	689	207	304	192	341	282	157	123	448	429	186	97	184	173	467	671	124	259	269	134	391
795	15.4	32	87	372	71	167	183	60	83	337	98	52	76	180	47	71	85	164	113	70	62	200	206	604	224	832	3322	296	756	114	335	102	268	263	164	190	350	388	114	105	195	226	100	267	114	337	351	270	460
796	15.5	54	86	58	263	86	434	110	159	594	476	50	309	88	69	89	155	149	92	59	79	261	312	920	147	892	3287	339	351	89	266	109	449	239	107	158	225	319	148	198	375	218	404	129	332	283	267	382	514
797	15.6	48	68	62	118	309	168	69	99	828	698	99	147	121	113	65	639	236	112	83	116	404	218	1552	156	670	1455	297	430	228	408	170	479	221	222	224	182	339	108	181	411	217	230	392	210	294	319	149	299
798	15.7	84	134	580	715	213	72	77	56	388	62	62	196	77	1057	53	540	621	154	360	307	219	179	640	118	401	1552	423	364	104	294	154	255	187	133	208	113	362	129	170	293	190	251	567	119	363	233	182	587
799	15.8	99	118	85	1108	71	120	50	46	154	60	59	551	238	151	265	71	72	456	118	103	167	207	403	221	404	1622	483	800	95	286	109	347	160	156	188	241	273	171	260	216	196	278	165	96	378	188	266	354
800	15.9	67	204	84	243	46	110	36	69	121	45	201	412	925	372	713	1091	116	998	111	95	181	156	580	115	549	1071	501	602	90	226	166	276	211	234	494	370	497	144	290	260	2198	248	888	171	357	328	537	627
801	16	267	995	633	916	538	426	518	538	551	464	1050	2478	1137	139	1405	1309	1568	1305	1372	2539	347	366	3565	438	752	4700	609	450	211	1097	609	680	310	366	490	350	396	253	343	417	1874	317	377	234	472	464	293	587
802	16.1	957	2321	1740	497	1109	834	1928	1199	642	338	1234	2933	2196	251	612	2061	944	2223	819	2681	289	264	2851	722	347	21622	493	655	278	885	562	1078	244	324	6863	541	215	328	377	321	1453	248	423	475	387	814	317	691
803	16.2	603	2233	758	1877	1476	1736	2127	480	971	123	1063	4337	1865	103	336	2174	860	2443	1506	225	431	253	2674	782	413	7749	566	981	214	680	563	1001	228	335	9031	390	345	191	414	375	2830	129	644	815	424	525	311	646
804	16.3	361	1919	752	2004	1523	1509	2858	125	1282	1657	759	4629	3316	697	472	1469	869	2860	1116	996	332	292	1101	381	650	7648	690	207	324	522	362	918	321	320	1324	510	380	156	319	340	729	135	122	449	551	732	254	514
805	16.4	98	68	430	842	1565	708	295	544	531	216	290	3144	4621	232	1587	969	1220	1539	2123	2237	356	294	1112	476	547	1864	377	232	224	423	237	1145	394	294	1262	369	268	132	263	380	4039	95	545	370	447	506	285	745
806	16.5	81	1612	123	658	1844	435	57	347	84	83	1350	6583	5040	138	831	1040	1614	2507	2369	1455	341	260	885	598	644	1960	496	214	294	464	406	717	208	376	1351	287	363	300	201	338	1259	181	539	482	397	719	270	742
807	16.6	94	5145	1682	1110	1982	73	48	91	548	226	2877	8267	4242	169	158	831	4784	1875	88	1144	293	215	1330	504	608	1675	392	340	218	476	559	911	327	435	987	266	404	136	192	557	1893	229	656	402	498	636	281	755
808	16.7	255	6703	767	456	11916	53	180	90	150	1015	13474	7933	5856	85	551	358	12262	1291	86	397	333	274	2435	673	835	8564	729	237	176	700	414	766	208	453	991	268	391	196	158	658	1773	104	567	463	461	641	297	641
809	16.8	448	6289	111	132	1938	23	69	170	132	154	17771	9178	5677	1449	105	62	15796	1767	1145	71	361	315	1792	767	271	21426	398	274	229	909	458	662	259	335	1581	268	255	213	260	745	2178	159	125	164	401	582	330	517
810	16.9	81	8641	116	264	1062	38	1870	94	511	102	9828	10700	5994	471	106	1344	13446	466	411	94	324	212	1908	565	641	17537	459	209	301	1032	138	723	365	337	1375	319	315	350	139	919	1215	109	266	315	535	702	203	509
811	17	436	10642	552	1915	1347	392	1552	91	161	53	14379	8636	5984	73	492	734	10126	1015	115	1720	165	327	1755	367	311	6600	753	421	229	863	229	900	356	414	1764	318	376	251	219	874	3834	217	261	437	441	386	293	530
812	17.1	228	14507	96	3442	102	110	1373	98	271	62	11508	9462	6393	94	98	5965	16634	157	78	682	292	254	5663	501	355	7688	490	165	274	700	547	696	247	319	1068	345	267	177	291	786	4147	512	608	332	452	505	246	739
813	17.2	88	13914	94	6538	73	100	142	92	337	60	11665	9355	8738	338	86	7139	1764	997	86	117	201	344	783	153	400	1951	268	257	201	475	696	699	381	460	1377	227	520	141	318	848	1699	104	304	235	431	514	323	470
814	17.3	94	12408	829	7081	97	779	127	94	946	212	12420	7393	6256	8556	1178	9638	1211	3389	67	75	217	229	794	160	468	1629	278	287	141	528	499	1104	443	261	1534	215	553	102	253	663	1881	259	246	347	557	378	306	439
815	17.4	64	3880	362	7137	83	328	101	310	1242	1561	5440	9558	6246	12538	125	12975	7339	6532	61	456	310	237	1240	454	469	1880	697	183	211	443	587	431	479	347	926	360	353	98	272	674	763	292	602	250	623	560	167	436
816	17.5	46	1392	2460	7125	66	1311	247	97	3365	11975	1152	9079	5564	11954	67	9332	11504	12639	117	71	133	161	1361	452	484	3775	460	477	196	728	303	705	194	303	1060	279	1033	126	221	1102	4835	216	271	218	672	698	294	489
817	17.6	89	8430	1289	7431	371	183	93	185	6284	18559	442	8089	6276	13636	85	10836	1299	13583	2814	587	313	232	1699	419	336	2629	524	228	235	807	169	637	235	205	1182	517	902	110	272	873	2723	424	304	150	490	684	309	446
818	17.7	618	15736	10453	5961	63	124	68	86	7062	17648	304	8616	8381	12387	94	10178	706	16938	5935	2679	456	345	1270	390	333	1995	380	407	223	558	670	1207	326	336	826	414	581	163	203	1093	2487	386	385	565	417	486	303	479
819	17.8	656	7760	1491	7715	65	91	101	88	6347	9182	556	9005	3300	14457	788	9340	910	19412	13141	4037	464	265	1223	698	401	2124	457	446	266	743	100	805	269	217	816	461	492	139	274	840	11364	314	471	325	630	491	248	439
820	17.9	1125	1382	1125	3987	92	89	201	83	7206	1011	66	9525	6851	12688	295	8579	143	15219	18918	6811	234	308	10856	411	318	8764	400	333	176	663	480	684	370	343	1187	402	1183	260	351	885	844	165	278	313	506	739	350	549
821	18	233	639	1375	6420	93	46	149	84	6159	706	62	9420	5656	10057	2498	7450	316	18635	16194	6916	577	221	3967	426	273	8058	377	249	265	934	250	1097	243	337	1821	342	981	256	331	1384	3741	65	87	238	559	1451	447	423
822	18.1	65	1414	9070	3682	109	98	261	71	4774	95	77	9288	6517	11138	1293	6026	845	13989	16663	8982	634	319	2360	220	377	6849	508	541	237	700	400	646	278	173	864	363	1124	252	281	946	1329	201	527	219	550	1265	323	701
823	18.2	62	151	17297	4951	56	53	442	75	5490	83	815	9847	6061	5367	633	7433	1099	13935	20761	9335	583	305	812	286	242	1726	526	749	279	1043	391	1042	164	273	894	423	1232	234	353	793	1303	406	186	332	749	767	318	322
824	18.3	69	109	1492	5302	76	106	926	83	5897	84	757	10219	5491	11148	932	6579	808	16775	14713	7231	771	195	2235	418	582	4724	380	477	262	817	170	726	269	343	4576	379	850	245	425	833	1657	61	127	282	501	1562	404	452
825	18.4	91	80	670	1424	461	59	1175	47	4367	52	237	7977	7222	4541	110	5967	159	15243	13621	8169	698	252	3062	666	458	2281	420	147	219	789	337	705	263	316	17514	353	969	215	281	1067	1583	100	299	196	603	595	287	680
826	18.5	82	315	238	4827	437	509	824	67	5045	299	78	7131	6225	7721	75	6818	195	11591	17328	11188	618	219	1415	467	294	1286	417	213	137	728	363	904	282	420	3928	391	1064	203	221	550	1138	206	319	181	708	1057	472	410
827	18.6	63	1907	801	1074	150	250	2114	67	4709	316	90	8615	7013	4159	952	6637	157	3545	18155	8723	640	236	1582	400	362	14343	289	198	183	1322	201	742	431	124	7869	424	1355	223	359	820	1175	115	513	510	500	826	346	441
828	18.7	82	500	880	3356	99	332	459	88	4339	95	114	9485	3467	7262	563	2061	137	3218	16159	7926	805	297	2738	295	340	26151	168	208	136	891	356	887	320	212	19277	290	485	113	336	1067	1668	235	339	143	699	3147	458	551
829	18.8	98	110	1678	418	72	506	335	431	4911	64	356	7871	4937	12035	109	5171	848	1948	4325	10588	709	312	990	593	400	18420	330	248	176	693	485	945	335	202	25097	369	498	109	297	975	2525	406	362	241	723	1567	218	510
830	18.9	93	104	1239	314	77	1642	196	762	2185	75	843	6880	5850	5109	578	6151	1065	1477	10539	5756	739	287	2275	496	385	10715	384	298	145	483	338	821	508	319	27876	297	1102	156	279	691	722	205	173	362	458	713	204	558
831	19	105	86	759	152	121	5133	152	751	734	99	275	8812	4748	266	715	4798	171	1251	5853	2866	482	310	1541	163	407	2247	415	291	250	313	428	886	190	212	23071	300	870	148	272	716	1638	104	408	285	449	629	178	220
832	19.1	58	62	139	95	101	6241	102	120	522	79	363	9382	4392	598	835	4094	98	1058	10968	4240	514	220	916	331	506	2081	423	377	134	298	270	2126	127	212	24982	327	1031	153	271	1051	1548	230	239	439	462	373	358	342
833	19.2	202	82	133	115	98	4829	91	107	120	73	44	8309	4220	679	1905	3815	291	107	6656	3978	796	405	469	233	384	2000	377	462	230	602	277	1768	381	365	29021	321	611	138	273	865	1770	212	100	252	389	664	237	263
834	19.3	69	145	969	107	86	7004	79	128	93	81	41	7631	5015	1196	916	1346	102	107	3759	2586	648	304	1170	287	336	2361	414	191	188	517	372	1975	322	257	20560	382	657	158	314	1003	1644	107	179	363	408	778	186	290
835	19.4	184	1102	303	86	88	5104	133	76	121	73	37	7090	3222	799	90	1174	109	138	1134	3355	700	260	1011	142	674	3648	272	117	217	377	428	1482	318	195	19746	512	987	157	289	1062	1778	207	170	101	636	2349	272	452
836	19.5	737	1671	434	252	64	5972	416	147	183	371	77	5178	2882	618	1294	4177	98	94	667	1081	509	208	1911	147	921	1214	299	227	215	194	344	1722	365	324	22094	242	918	178	263	814	1289	203	631	185	501	660	213	373
837	19.6	860	2066	332	786	71	5644	163	64	190	94	58	6233	1886	1220	426	2892	101	123	430	746	567	117	1826	92	765	8543	381	211	221	545	386	2739	326	260	11534	403	878	243	289	444	923	91	412	316	719	617	216	406
838	19.7	11898	728	1717	2024	91	4714	247	52	130	723	30	7650	2834	249	1394	3477	359	570	94	641	674	247	2529	363	1100	14309	407	311	239	682	351	2512	342	299	20044	436	779	131	317	722	914	79	272	381	524	459	224	444
839	19.8	2192	99	312	1234	76	3364	323	62	87	293	44	5644	2613	170	183	3082	298	132	80	1395	678	240	1827	380	1113	16271	310	190	228	473	458	1935	272	248	11623	466	1269	134	330	573	1742	140	296	347	438	319	227	386
840	19.9	5487	69	402	85	76	3442	69	77	367	748	53	6778	627	211	395	4412	95	203	79	1873	461	291	1323	420	946	1967	414	257	275	537	350	1637	208	223	762	583	1312	201	268	794	2078	333	564	182	644	633	271	384
841	20	15253	77	134	92	85	2036	63	67	578	1363	195	7413	4354	389	1092	4702	57	203	391	255	739	390	1569	234	874	2364	447	93	174	439	265	1768	296	239	894	589	769	136	303	1039	2870	197	283	264	393	1039	264	414
842	20.1	11879	86	97	87	76	480	84	97	86	85	1363	6545	3264	761	95	3825	515	1081	751	1704	566	242	1570	289	823	1504	292	222	158	548	283	2274	338	218	1680	524	898	146	264	1204	1788	139	207	528	413	766	174	446
843	20.2	13871	77	102	68	70	93	57	56	85	75	597	6716	3008	101	101	4658	717	1275	2497	1641	452	241	1367	489	819	4603	211	140	184	509	287	592	302	201	659	295	480	297	312	1050	1357	78	398	223	543	132	227	419
844	20.3	4586	75	119	68	85	93	65	23	112	80	1173	5073	1252	115	238	4150	51	747	408	646	253	243	1556	351	346	1605	254	654	169	717	395	420	183	224	597	326	522	174	230	333	590	309	482	292	429	403	335	456
845	20.4	823	67	439	108	77	85	88	95	99	81	814	3629	1477	93	1471	1052	291	1632	3767	533	493	158	2063	384	946	1950	241	248	212	432	218	328	235	294	336	340	475	139	380	436	1234	102	238	155	594	585	240	466
846	20.5	814	86	88	1329	88	128	75	69	100	80	209	3903	842	125	77	4153	94	2217	5931	77	805	228	886	312	1309	5733	280	210	250	349	339	305	167	216	413	345	946	124	364	152	2118	205	71	411	558	1000	173	505
847	20.6	3304	1211	269	2130	51	81	309	126	188	72	127	4596	1650	69	79	1042	868	2437	9912	54	621	154	1050	260	958	8217	167	110	307	298	368	513	302	226	277	300	998	174	242	237	1189	127	328	640	519	1133	249	359
848	20.7	5441	1541	297	584	58	131	238	504	159	49	456	4552	2482	133	92	4264	138	477	1306	508	488	203	1267	244	606	6445	438	145	266	429	375	352	257	254	536	225	1137	252	229	295	1195	234	349	237	468	1178	312	340
849	20.8	10820	910	88	1407	436	76	210	281	419	88	165	2677	3128	108	59	1512	118	752	13399	1619	491	244	1571	282	364	2129	220	301	289	576	277	509	239	329	401	236	921	256	295	221	672	211	248	264	742	1138	309	420
850	20.9	11544	212	85	1354	367	875	230	249	563	105	486	2636	3825	100	67	202	664	343	17291	921	574	279	1138	277	450	1769	505	269	145	483	326	449	231	375	228	413	575	149	335	208	1409	230	280	263	475	1298	203	613
851	21	4708	205	56	1445	85	633	112	118	125	70	970	3948	2679	88	62	182	927	139	17960	1357	734	235	1256	451	454	2323	431	275	139	635	145	227	281	264	598	331	697	234	270	311	1279	309	221	336	509	2686	253	403
852	21.1	429	250	78	1254	66	162	77	98	89	94	471	854	643	81	890	377	81	166	9279	1894	536	119	1853	208	890	10311	312	309	89	154	349	244	189	189	510	493	604	225	242	402	555	272	135	91	428	4387	200	504
853	21.2	210	223	39	933	78	69	240	106	108	60	53	2423	1679	218	232	1580	71	582	3185	2183	645	311	814	443	719	16373	516	67	230	290	421	266	243	451	544	419	235	150	247	351	505	192	375	61	377	4672	291	462
854	21.3	67	535	197	1608	78	66	334	102	125	58	57	5186	1127	578	1649	852	88	123	682	1506	642	249	895	175	766	20727	319	174	214	431	313	405	230	231	542	471	217	166	380	291	382	374	242	549	229	1251	222	469
855	21.4	57	311	110	471	87	42	493	111	111	80	77	2860	2491	70	960	1236	58	112	2119	84	442	240	788	475	703	12157	256	272	302	422	334	429	240	271	552	309	368	200	322	302	617	461	163	377	550	2224	219	464
856	21.5	188	936	320	92	67	71	568	874	413	59	442	2595	2108	47	437	1883	75	112	3894	254	459	208	1319	216	854	1417	156	195	236	578	242	321	182	151	380	243	349	157	258	409	1095	274	320	243	430	1066	280	396
857	21.6	273	1390	459	128	80	72	114	214	132	83	974	2437	3122	611	1070	205	69	560	10553	56	602	218	967	535	825	2032	503	223	177	387	343	568	273	157	536	320	158	161	309	228	1114	96	400	391	493	7746	324	483
858	21.7	622	268	1603	175	104	74	85	99	615	214	182	990	1654	608	136	141	72	107	666	202	474	141	1677	276	825	2397	530	92	161	510	435	473	286	175	486	402	408	148	361	278	1318	103	90	181	570	692	243	443
859	21.8	389	99	806	1136	78	75	707	138	1681	720	142	2066	1162	171	69	753	68	100	104	125	529	251	888	397	908	891	473	308	261	650	260	266	227	242	458	230	483	192	334	249	1532	247	297	462	563	652	196	272
860	21.9	351	125	65	489	89	93	1616	114	955	97	484	2392	299	113	109	823	67	187	113	295	644	223	502	188	801	3689	369	160	216	215	303	305	236	182	518	345	194	72	321	137	1252	85	587	153	640	891	267	469
861	22	85	140	66	88	69	115	839	70	129	84	273	3922	648	121	97	175	63	719	2044	739	875	170	589	223	791	12903	393	279	204	106	373	475	270	126	351	585	244	68	223	185	1008	262	356	293	471	1578	277	269
862	22.1	74	95	58	77	71	331	123	72	101	84	243	2266	137	124	165	1460	283	336	10164	1418	878	260	989	338	637	22958	522	206	241	470	201	659	447	175	1197	365	183	130	189	267	1195	216	370	332	595	12743	402	428
863	22.2	47	104	71	90	68	647	89	55	93	67	205	1888	331	116	89	2897	366	1034	18162	1579	588	217	879	396	713	4913	457	98	206	585	361	257	546	309	180	237	240	138	203	255	1638	314	93	259	371	8938	207	443
864	22.3	88	93	45	95	78	205	100	56	121	84	334	1004	1752	253	85	3320	297	2306	9054	67	624	262	1657	298	899	974	333	87	177	665	241	468	827	397	307	229	354	186	223	180	2205	107	303	229	403	8986	208	581
865	22.4	165	1145	64	84	73	75	94	96	102	114	892	2576	2615	244	1280	2017	939	2779	13592	60	519	239	2909	221	720	7692	382	320	122	669	307	969	663	189	566	280	308	96	209	154	1242	220	428	471	403	8020	203	356
866	22.5	152	461	1113	145	329	60	110	58	305	100	513	3461	2488	725	2294	1016	109	185	953	70	488	282	2031	94	544	16459	195	95	138	846	250	1617	753	243	470	265	496	212	258	97	2145	153	208	135	331	13455	335	385
867	22.6	89	672	250	1392	1879	52	118	48	116	55	131	2467	2142	210	6365	556	82	779	262	127	568	212	1249	257	876	9633	338	257	164	621	178	3172	644	300	297	291	576	117	227	237	1228	307	210	395	473	2734	262	437
868	22.7	92	2599	97	2291	869	94	106	159	416	261	206	2457	3326	3401	13507	1349	553	133	650	555	531	263	1159	312	759	3419	358	254	234	897	80	2380	402	108	477	382	800	104	266	275	1169	268	393	146	471	10692	187	299
869	22.8	734	1360	97	1464	841	110	924	234	1321	75	137	1294	2459	9502	16762	107	1195	132	9604	1485	503	279	579	116	594	2829	266	135	286	938	185	1338	786	212	466	424	537	92	310	157	558	165	289	93	408	17420	229	437
870	22.9	210	394	86	158	198	1129	115	77	147	114	54	2638	2032	13246	15703	568	620	350	3258	2798	341	281	1703	50	575	1078	207	241	163	706	282	947	851	109	492	282	687	133	332	229	897	253	89	78	548	10249	231	554
871	23	776	81	238	519	457	808	121	159	111	993	261	2675	446	13841	15011	1081	79	159	7931	514	262	218	2142	280	520	1769	349	235	267	301	266	728	466	158	236	465	112	105	237	210	849	90	451	253	428	14864	314	347
872	23.1	9680	70	73	1458	100	1548	102	73	95	1309	218	1864	244	14372	19356	242	52	124	6972	79	543	242	2737	270	387	3402	590	150	200	614	403	746	297	145	281	298	591	155	271	256	1090	260	643	139	520	17698	257	399
873	23.2	15549	81	250	1033	375	232	1202	95	100	91	259	2096	419	941	9933	280	73	1409	14930	79	510	235	721	212	368	1465	167	176	240	704	197	671	279	257	294	378	798	137	296	343	1302	102	450	282	570	21085	271	359
874	23.3	253	739	1871	457	308	174	1089	170	84	67	372	1279	106	10676	1217	247	270	1503	16304	316	432	213	687	314	474	3084	193	401	193	565	411	866	298	282	466	446	920	249	287	228	1109	233	397	344	374	8036	239	252
875	23.4	195	89	2118	98	659	75	194	103	94	63	327	1432	85	17441	52	234	1090	2252	2706	104	273	267	1157	356	687	1012	246	125	222	1014	221	1312	622	255	624	457	823	174	360	355	981	298	442	386	532	30335	222	318
876	23.5	121	190	570	99	425	92	51	129	160	74	360	2746	339	15883	97	116	527	1554	454	87	383	174	636	541	691	2066	333	138	272	507	200	1234	394	357	363	364	873	152	212	182	1049	371	280	530	433	788	360	385
877	23.6	201	820	335	85	97	58	84	140	672	50	414	3292	716	8014	382	99	108	1262	16616	526	292	192	1648	216	799	5811	207	180	241	527	469	1141	622	253	390	413	950	180	298	142	937	100	528	229	518	27420	350	403
878	23.7	123	2243	83	102	77	67	66	122	510	57	421	3564	3503	465	85	544	226	1729	17489	89	227	257	2329	328	615	3868	351	249	101	400	139	1671	331	299	358	187	306	139	273	308	607	80	530	272	511	27759	208	517
879	23.8	687	1282	83	186	84	63	75	124	1299	521	820	5617	4054	231	81	530	223	1227	10080	276	329	189	1865	253	939	1442	319	293	124	516	265	1558	629	311	984	287	458	233	263	219	704	259	108	244	404	24894	188	212
880	23.9	1167	1605	58	958	83	89	481	183	1674	366	386	6739	5387	666	355	1669	1202	607	443	798	130	173	1017	740	1012	1002	450	311	179	433	370	2174	707	183	816	264	626	123	315	339	669	242	74	486	242	11669	216	374
881	24	312	145	132	158	378	55	92	118	539	83	430	6551	5318	146	379	611	135	144	225	70	287	239	1783	135	758	2138	416	128	211	216	363	1186	409	315	543	366	929	145	267	855	476	325	87	307	522	25924	308	450
882	0.1	71	142	133	130	256	59	69	132	121	102	354	6043	4453	174	888	952	1223	98	522	382	232	256	1819	410	506	1921	549	124	218	261	345	670	723	305	799	198	710	144	293	767	439	227	150	256	402	22814	334	355
883	0.2	114	1268	809	96	105	71	46	102	125	64	453	7092	4187	150	713	145	1537	162	99	57	312	320	2224	257	404	1035	114	67	344	451	374	1053	506	200	835	417	444	166	264	1027	307	128	258	124	391	20405	406	597
884	0.3	74	117	103	548	323	87	51	101	362	70	337	8588	3772	315	1177	141	343	287	92	92	418	231	1093	219	474	4772	318	197	260	567	285	1202	568	209	747	312	730	121	260	1055	652	118	105	216	383	17895	302	440
885	0.4	61	155	84	81	153	69	58	905	740	94	374	7500	3851	119	967	547	1046	1544	132	73	236	137	2720	319	475	13029	396	57	203	177	312	834	863	212	847	254	597	197	261	1003	304	208	136	97	365	23914	287	219
886	0.5	100	86	74	260	126	73	131	226	99	54	399	6305	4221	120	2050	725	170	324	434	66	301	235	1024	325	842	11543	475	266	224	380	240	2535	519	124	675	161	866	149	279	977	298	270	218	332	506	357	474	251
887	0.6	261	582	70	184	110	71	692	188	72	62	302	8345	5985	132	1023	930	448	2745	84	124	206	192	1215	141	341	20730	257	86	176	260	230	2172	253	182	776	442	1226	88	300	1142	402	184	229	274	439	166	343	324
888	0.7	88	1741	965	87	124	156	1633	538	140	79	628	6955	6045	594	88	177	889	2086	116	683	366	239	1062	308	325	9901	294	139	216	171	297	2264	226	288	644	388	1111	330	366	945	245	224	242	269	499	283	204	424
889	0.8	119	796	109	91	91	307	459	99	103	702	422	6433	5634	1099	72	142	1165	125	100	1298	350	343	799	361	422	11858	582	388	159	138	403	801	522	214	881	419	1648	162	370	1083	257	86	410	249	499	739	345	423
890	0.9	66	1025	458	1496	73	1494	594	105	7370	953	361	6485	3073	284	62	88	339	182	93	595	364	206	1211	340	466	4083	391	186	113	207	259	1831	278	183	732	340	1447	125	287	486	258	105	218	308	489	904	272	390
891	1	1225	178	184	1937	100	2526	1303	98	12188	2177	418	6256	3696	462	403	731	149	139	88	175	455	204	801	243	766	1441	263	220	228	451	324	2220	327	244	879	280	712	127	250	235	383	287	231	449	408	669	228	444
892	1.1	1339	96	99	217	110	2429	102	84	1095	264	663	7017	2753	92	770	106	239	650	2105	98	265	303	1987	298	1038	3400	596	99	280	787	213	2868	712	312	734	306	462	250	232	330	606	163	545	215	540	8640	281	607
893	1.2	338	965	85	155	85	104	97	85	629	105	477	7850	4282	113	933	85	512	130	2507	220	169	270	999	365	279	6640	334	317	204	323	346	2275	861	144	542	353	611	196	221	140	744	249	153	298	416	2112	314	317
894	1.3	4927	1462	92	137	66	170	112	239	942	69	428	6404	3048	119	144	104	943	155	2984	243	205	285	1059	142	754	349	504	282	188	136	269	1054	597	221	956	232	362	208	205	499	487	358	364	236	464	1178	275	437
895	1.4	11666	184	279	273	72	193	106	103	806	105	260	4798	1432	62	88	110	202	180	1708	1161	220	186	1578	263	581	2096	382	131	270	277	129	1102	591	155	802	614	465	178	246	385	356	319	379	369	468	16506	232	524
896	1.5	139	624	116	105	57	481	106	72	112	79	226	3222	693	82	64	478	948	755	179	1671	305	230	946	561	640	10209	267	182	140	249	161	2561	474	115	1007	270	259	130	231	989	272	160	263	399	324	14957	123	271
897	1.6	89	163	75	117	85	92	78	68	98	82	319	4305	1691	456	265	861	217	2084	648	2775	331	474	2823	134	1401	8959	285	170	168	390	158	1392	747	184	716	257	310	85	310	1069	372	280	185	377	489	234	265	467
898	1.7	71	69	395	82	1231	103	101	80	98	86	333	6062	1209	363	201	776	79	1414	103	9271	208	436	3700	66	863	584	446	96	190	115	321	1164	639	213	1028	394	311	93	321	692	522	149	250	292	475	459	252	391
899	1.8	86	1187	222	77	164	92	72	109	371	69	315	5379	2302	91	649	467	977	613	1002	9519	247	443	624	225	578	2365	242	260	279	137	369	911	773	343	421	271	744	144	283	1100	530	129	200	125	402	557	216	389
900	1.9	420	1122	179	96	107	125	70	66	108	74	331	3986	1142	85	749	72	562	286	1429	8409	277	307	737	216	666	3144	334	216	307	384	303	1341	394	273	522	244	267	167	273	531	745	287	338	199	520	800	265	488
901	2	102	97	1194	109	75	92	94	31	363	53	510	2094	1910	210	474	75	1396	149	118	8704	336	266	557	432	623	2224	438	281	287	145	392	963	475	239	501	404	336	123	232	939	998	217	354	278	437	771	335	479
902	2.1	570	113	706	345	75	117	83	47	384	66	498	2523	2793	498	99	66	187	117	132	3632	283	361	607	892	881	5508	302	213	238	260	258	1785	674	187	334	463	1639	134	329	1079	1680	334	237	318	323	715	271	371
903	2.2	288	110	79	1071	66	863	59	52	541	70	61	4248	196	448	64	92	137	141	95	4630	197	268	959	188	522	23005	543	117	229	567	310	1765	478	177	764	288	682	129	255	773	1019	245	287	514	384	540	231	446
904	2.3	380	76	76	1258	67	329	84	41	106	65	120	4142	238	97	69	74	106	131	46	4341	288	159	952	299	530	26344	434	122	271	261	348	796	552	178	707	391	1252	168	358	1091	1037	243	430	194	575	274	272	480
905	2.4	450	71	39	121	61	320	79	80	99	54	170	4220	1934	99	277	129	249	162	109	793	307	210	1775	398	569	11428	282	117	226	696	329	575	404	271	490	336	831	116	311	989	2322	174	349	215	515	232	312	300
906	2.5	868	86	324	394	91	88	114	79	108	64	555	4597	1766	73	94	129	99	99	946	336	245	237	1422	168	1136	6066	295	271	235	636	373	966	361	192	196	483	421	135	313	1540	449	115	145	133	441	219	250	331
907	2.6	98	128	52	106	65	702	181	83	126	742	171	5981	690	113	100	869	135	566	2272	192	256	450	1022	398	910	700	254	194	163	748	341	2180	592	227	234	511	416	156	248	804	799	292	426	380	405	213	228	308
908	2.7	109	129	78	103	45	485	248	245	115	83	162	5812	265	622	757	2635	86	1774	9130	83	312	458	2143	227	806	1895	301	188	152	968	319	1816	305	313	373	557	219	179	264	931	1339	151	298	140	379	185	263	421
909	2.8	411	2153	65	116	85	867	192	99	369	79	173	4644	350	1459	262	2097	667	1486	17571	84	345	462	2080	397	803	1677	196	402	164	480	343	1984	466	323	476	386	1299	146	284	880	1791	153	313	158	385	181	210	362
910	2.9	72	2042	113	103	86	883	267	322	165	63	121	4002	3226	1807	1030	339	299	1018	14961	220	333	281	1669	417	1064	5276	239	314	164	383	242	2525	882	228	764	359	936	121	288	670	2011	243	444	305	358	202	214	391
911	3	70	1399	248	91	80	123	546	129	151	57	144	4848	3002	1005	933	1458	960	1868	15669	524	538	150	783	423	854	2506	294	309	158	487	335	1899	635	277	595	380	967	114	235	863	541	127	465	219	505	243	278	414
912	3.1	88	159	672	687	74	73	70	105	145	78	262	4915	2396	748	90	4293	133	1067	15492	1524	378	255	2051	172	1209	2933	207	608	155	362	151	1688	620	329	690	341	575	117	244	981	510	214	388	398	381	219	286	596
913	3.2	73	100	1476	128	52	86	166	121	328	82	562	3571	3605	144	269	3997	129	130	14680	2126	542	245	1176	171	621	8572	301	803	103	841	383	1265	414	214	1079	298	721	110	174	802	870	243	261	308	480	533	431	532
914	3.3	200	122	550	90	261	62	92	120	120	72	247	3963	4419	491	358	4561	88	74	18314	744	480	308	1810	434	846	21015	429	633	127	907	196	3050	494	296	456	213	625	135	293	752	1227	280	189	123	384	323	296	351
915	3.4	71	149	342	92	957	76	99	164	95	95	177	4879	3527	828	709	5971	96	194	15132	92	469	254	1019	240	1061	13355	184	356	206	623	318	1742	578	206	546	198	836	163	339	758	1323	195	208	149	490	323	278	553
916	3.5	141	155	573	938	501	89	969	92	365	79	248	5597	3600	99	365	5258	93	953	308	1193	327	297	745	384	1427	838	189	319	151	422	381	1718	507	319	616	232	1175	216	370	1023	1365	248	350	380	494	392	314	313
917	3.6	948	83	96	1731	642	60	1327	72	92	69	503	3902	4140	671	95	4803	74	122	772	254	332	230	941	319	574	2159	216	136	101	821	312	1129	308	303	334	281	722	166	361	1506	1194	165	197	115	324	239	231	437
918	3.7	1152	90	82	149	118	545	2026	75	119	38	93	4137	5229	1737	115	4193	67	569	834	1900	397	251	781	333	873	1839	146	184	176	435	347	1253	547	221	397	275	746	258	236	693	1075	215	196	264	435	241	314	9153
919	3.8	702	702	519	118	76	1387	598	66	99	55	46	4813	2817	715	74	3755	490	100	811	103	228	242	1024	692	343	2040	493	326	175	275	333	1534	526	218	712	361	674	236	242	493	821	245	350	263	442	275	229	16543
920	3.9	375	97	490	94	86	3734	348	62	87	857	84	3399	2883	77	147	3937	523	95	420	570	171	202	758	356	515	2023	144	236	186	465	352	768	569	221	524	269	419	198	308	451	1747	85	303	128	469	205	373	14417
921	4	108	125	99	160	107	4890	100	114	284	91	95	2931	3879	78	179	1736	726	74	71	1046	166	302	970	423	419	10395	126	114	280	388	347	1335	607	293	345	453	566	106	285	402	1472	151	316	368	402	291	339	15600
922	4.1	111	136	64	109	100	5363	75	1211	172	84	34	3960	2199	114	1189	635	428	150	1239	1471	320	185	512	139	245	2746	204	128	144	246	363	1496	571	224	538	552	1152	74	233	589	743	154	180	217	424	374	493	9200
923	4.2	60	104	65	84	73	2004	54	274	119	61	36	6763	1292	142	425	339	228	497	560	2298	255	296	1718	283	453	931	508	284	131	428	190	1552	978	257	229	425	575	192	285	513	515	251	266	186	486	955	435	11239
924	4.3	96	86	154	94	55	255	97	63	122	60	57	5403	1817	130	811	699	77	118	145	2138	554	162	1313	279	865	5283	371	106	242	783	121	1804	381	213	364	331	1396	113	271	156	687	214	140	218	300	1077	308	6328
925	4.4	116	102	61	104	74	104	109	66	76	62	81	5577	2425	111	80	1541	546	103	57	1455	1270	211	1660	290	1143	22047	396	201	215	489	405	1377	348	254	481	530	819	94	355	165	592	205	352	194	321	1685	407	9176
926	4.5	72	62	268	140	135	61	92	81	83	85	55	5432	2553	416	92	789	91	108	52	4007	1212	223	1572	257	1063	7056	179	190	128	576	217	1063	431	288	566	264	817	271	386	294	1282	11810	240	297	251	1026	181	8811
927	4.6	76	76	205	335	87	80	94	48	113	58	39	5178	1563	675	914	1274	85	1394	79	5429	1313	230	364	226	913	339	539	259	271	532	369	1180	398	310	324	355	863	144	313	261	1207	2435	271	162	441	695	239	7704
928	4.7	69	89	1170	81	73	84	102	60	94	56	61	4476	2139	644	97	1005	81	2141	772	3791	967	190	1782	221	873	1369	383	239	216	367	256	2146	656	212	228	339	3029	92	304	274	607	351	341	205	396	585	286	6219
929	4.8	108	72	396	64	74	149	110	90	633	75	97	3853	1335	463	569	779	780	682	1130	1389	1296	354	1375	447	881	1336	547	175	159	351	95	2062	1046	229	679	242	797	149	240	420	758	370	331	303	486	692	295	8552
930	4.9	53	466	52	84	79	63	99	89	1006	161	73	5843	2205	456	811	1106	981	617	1064	1268	1104	185	1836	380	588	4726	266	231	222	666	317	2001	767	172	902	246	1064	144	416	273	685	270	108	247	437	615	357	9767
931	5	127	1417	29	135	80	65	161	82	216	532	237	4033	2718	1200	626	1234	634	139	66	2050	1179	166	1284	431	375	1639	379	198	181	358	213	755	930	190	239	351	1408	129	359	467	356	165	238	261	303	1151	278	5832
932	5.1	213	420	57	152	61	53	110	47	480	964	495	3773	852	791	75	838	1025	51	398	389	1070	168	1593	205	649	779	413	310	232	505	211	1096	791	175	202	313	1241	178	372	391	468	4731	200	195	428	857	171	6685
933	5.2	190	95	55	121	46	84	154	49	119	1275	198	3959	875	120	86	101	949	597	389	86	1190	211	1839	332	1229	2791	528	337	271	464	277	1042	379	150	243	187	593	116	275	399	450	16262	501	320	371	3767	312	9295
934	5.3	73	116	71	83	55	667	99	65	113	259	101	2138	1954	100	1727	72	478	119	818	81	1376	177	1207	352	670	501	195	223	239	586	315	1340	474	347	936	339	474	162	253	560	288	11479	116	298	542	1049	280	4147
935	5.4	102	95	239	289	62	2374	1410	67	104	71	39	4106	1769	97	923	867	252	118	1131	68	1295	132	2152	404	1144	1318	387	296	156	601	340	2864	341	205	485	295	562	142	355	656	294	104	402	265	427	2959	156	8011
936	5.5	78	88	89	1249	72	3925	112	76	105	78	53	2096	1055	99	282	691	1081	76	766	87	1247	173	1278	589	1144	6321	442	187	166	439	237	1838	496	189	486	300	231	144	407	461	314	209	364	251	325	4592	327	4653
937	5.6	101	100	48	841	40	5533	105	27	109	70	43	3347	1269	82	298	477	510	331	332	62	1492	350	1880	428	483	24719	404	189	169	216	110	1577	693	262	305	259	592	209	315	435	238	214	409	489	435	3596	210	5113
938	5.7	86	112	67	1364	70	2695	1374	28	307	65	47	2741	1375	99	412	168	673	2290	111	79	1483	220	3597	394	815	14990	334	297	180	234	250	1737	357	559	481	301	261	80	346	473	296	75	211	384	438	275	184	5328
939	5.8	60	91	77	172	86	4602	547	87	294	47	29	2070	777	88	91	661	104	1971	82	440	1582	150	1932	173	876	2483	295	126	294	481	472	1622	395	411	515	348	1489	180	383	589	350	384	535	487	431	496	239	7755
940	5.9	87	62	57	112	69	4998	143	59	86	83	128	1970	1093	83	359	70	343	1518	36	1876	597	491	1135	236	848	899	372	324	266	518	293	891	296	459	408	388	1144	264	305	666	469	63	109	316	344	3311	210	9723
941	6	280	70	100	72	101	954	147	147	72	98	493	2489	1220	722	486	73	162	2246	70	1765	782	225	1414	133	1152	2110	498	272	256	344	347	884	321	463	574	301	1418	192	148	553	252	393	524	170	365	2828	230	4246
942	6.1	332	85	64	75	79	73	106	54	261	188	1820	1905	1232	155	466	306	126	136	69	1307	1312	270	1043	444	781	1512	388	185	195	335	408	1253	285	257	439	280	1627	227	401	698	266	128	331	186	415	3589	336	2081
943	6.2	1612	94	62	74	58	90	132	77	399	83	953	2014	846	129	437	109	346	134	60	1918	774	181	935	370	835	1875	372	83	236	244	174	458	197	294	477	289	791	363	228	1027	255	213	590	159	450	9662	256	2669
944	6.3	84	94	81	93	178	58	117	59	74	100	285	631	1635	71	791	124	515	140	78	1213	768	252	982	248	257	1276	316	221	260	465	437	1036	789	346	512	420	782	242	206	789	217	77	163	264	508	20902	188	3682
945	6.4	818	438	354	1405	438	136	120	50	104	66	286	1333	1698	169	867	930	553	71	77	371	595	207	524	284	500	1066	480	260	189	318	368	598	482	345	576	286	1595	153	201	427	388	140	518	206	453	20404	174	2972
946	6.5	514	1773	278	365	159	862	126	50	69	405	216	1499	1588	636	329	349	97	205	165	1187	829	319	990	487	608	1198	424	90	128	257	276	912	448	250	708	332	596	142	308	191	554	343	168	297	402	5721	247	2905
947	6.6	513	1565	658	88	97	107	126	87	103	68	283	1438	1473	159	903	1225	70	136	128	1154	828	200	1111	343	735	999	288	136	212	193	212	1791	399	226	1412	198	933	76	349	229	328	147	347	206	386	8163	335	678
948	6.7	367	772	435	290	82	48	126	96	102	71	352	1687	2854	395	129	1114	170	533	95	788	1050	177	932	379	839	2625	246	142	206	453	126	577	475	242	636	404	1045	225	172	494	408	173	328	124	476	17692	136	654
949	6.8	92	466	321	138	71	71	111	197	86	69	222	1323	1213	763	325	689	98	106	77	627	897	261	3859	161	919	15478	213	286	224	778	323	445	646	312	492	395	1104	178	291	492	397	213	266	275	490	30938	249	747
950	6.9	78	86	42	131	84	54	118	663	75	80	370	1009	790	934	76	462	102	119	66	627	1409	272	1322	401	1006	24892	372	81	228	343	301	1545	425	260	743	325	1020	124	315	462	581	186	215	158	309	9178	229	1213
951	7	73	86	77	83	77	49	74	1261	116	73	525	737	1051	1218	104	734	97	177	50	78	961	158	630	298	606	10810	238	157	184	282	281	903	565	396	283	403	1403	137	291	522	576	191	340	129	379	28340	152	8971
952	7.1	67	86	57	102	84	124	88	331	384	61	153	1089	1679	1086	108	925	109	166	133	76	701	161	1076	252	350	7155	232	115	176	269	425	335	261	288	916	371	1169	131	287	582	614	264	357	324	356	32173	247	5492
953	7.2	139	94	71	125	72	92	101	63	129	49	197	2900	1480	1125	1126	1358	97	211	54	50	782	244	968	232	578	2083	354	317	176	257	336	563	340	199	412	342	755	157	340	774	888	213	415	270	394	25093	276	4290
954	7.3	77	84	75	271	307	159	508	84	120	71	119	1525	889	701	1063	781	88	698	78	85	560	445	1397	362	711	2495	206	503	219	559	273	531	414	330	398	365	1588	181	295	913	331	109	451	134	483	24426	218	5952
955	7.4	54	86	613	99	639	1401	160	63	557	67	134	233	824	1699	1193	304	92	1350	92	77	903	225	726	168	819	1322	460	208	169	432	279	1110	442	119	620	338	1142	115	367	954	1759	299	468	222	288	20750	160	6101
956	7.5	59	68	1136	92	924	1357	123	161	82	68	515	104	280	133	1840	304	75	2475	124	106	929	202	1001	351	610	3090	338	249	321	522	541	848	342	292	749	558	1485	105	320	1043	1067	195	489	341	358	18964	182	4505
957	7.6	76	87	206	117	546	705	201	97	89	155	269	90	2164	98	591	349	398	1850	125	958	618	254	899	289	619	1997	453	230	251	478	337	745	515	290	1043	344	1492	112	250	875	495	166	454	158	443	15794	246	6945
958	7.7	124	429	127	890	608	95	370	73	109	403	191	130	2769	100	147	408	307	1632	44	1420	641	350	705	229	207	590	263	254	222	665	191	1267	231	450	611	394	870	93	285	927	515	156	225	280	383	11468	203	8518
959	7.8	97	90	84	1217	184	71	31	164	82	70	204	100	1273	69	50	171	105	2119	417	1401	737	318	1559	303	520	1502	190	588	244	396	584	1927	398	195	838	377	3063	174	273	1236	438	204	215	234	418	11472	317	5611
960	7.9	85	66	73	816	421	68	72	90	71	61	103	157	1200	66	94	78	271	225	242	121	1313	299	481	208	507	1863	217	392	165	632	246	2313	335	178	560	415	2428	153	351	1117	1320	225	202	350	455	17166	366	6334
961	8	90	105	234	983	93	82	43	85	121	84	315	530	2203	122	59	453	110	123	850	253	1474	237	1039	320	526	7279	240	383	167	527	379	1891	475	275	400	436	1178	216	343	1161	842	330	63	104	462	18601	225	5150
962	8.1	108	87	89	725	89	69	69	82	116	90	177	992	1265	144	41	209	71	126	489	838	1283	244	889	198	290	8197	502	164	297	662	267	1196	514	214	322	380	843	152	274	1188	447	161	348	279	328	17121	493	6178
963	8.2	428	109	308	49	101	154	95	64	381	92	80	2223	396	753	53	121	102	67	1352	596	386	208	838	204	1305	1518	290	112	323	671	371	1443	924	365	967	357	10025	281	311	1086	508	429	288	406	496	3682	467	1723
964	8.3	253	1013	88	63	85	129	116	65	738	57	227	372	981	60	58	77	65	567	864	1348	629	132	898	162	1625	755	303	318	249	268	448	1225	909	332	447	489	749	181	220	1179	1401	270	227	135	428	4393	467	3411
965	8.4	112	1488	658	95	52	325	77	63	957	63	74	88	1196	105	143	63	123	84	821	612	765	269	1265	469	110	808	150	337	166	353	249	716	1015	315	353	297	578	155	276	1134	843	219	334	380	350	2048	334	2534
966	8.5	335	1107	739	107	72	440	105	59	674	68	60	81	690	69	81	60	169	105	84	1100	984	342	595	391	590	2544	220	311	202	738	279	1051	563	345	354	254	359	202	243	1170	710	322	329	128	417	542	328	3614
967	8.6	324	1526	519	105	108	139	55	69	160	142	317	591	351	125	78	98	951	95	64	1409	577	123	707	420	1062	1467	389	366	171	379	447	1588	272	435	636	273	287	183	273	1210	573	342	427	305	436	301	311	3573
968	8.7	94	94	238	422	108	356	57	60	366	620	187	631	149	96	692	764	790	86	77	873	491	174	515	245	625	714	253	176	329	477	395	1871	282	226	643	326	5430	193	385	929	455	219	478	364	336	552	485	5581
969	8.8	208	124	70	83	123	956	954	59	522	894	54	359	139	55	636	657	571	76	65	779	406	313	839	288	1513	1805	364	126	211	820	322	1760	175	325	262	367	570	151	309	1097	501	215	330	199	534	2065	280	3678
970	8.9	92	131	592	92	92	1284	1721	72	928	457	61	562	364	112	622	151	62	96	230	56	345	341	902	205	1120	1273	259	378	252	669	407	991	431	282	276	393	1017	136	327	1230	763	90	170	246	342	3085	320	11883
971	9	96	103	179	132	287	1317	1597	411	216	530	116	608	348	386	81	612	96	59	177	317	287	194	686	255	695	1287	361	306	277	703	330	1680	447	301	564	290	771	139	273	2068	372	393	375	449	396	7749	321	3688
972	9.1	97	306	185	701	522	268	1156	841	110	922	210	2012	1024	77	101	110	85	373	89	637	308	331	664	152	777	998	409	340	243	394	338	1375	609	228	884	289	4284	101	293	999	510	156	92	160	350	10456	249	5101
973	9.2	87	248	102	1503	139	81	515	427	84	194	150	2498	657	36	1610	71	90	59	58	1651	528	375	460	344	1137	1101	470	334	247	221	385	1965	660	388	417	205	802	197	236	800	476	249	426	125	455	21537	377	5706
974	9.3	230	280	224	245	76	75	365	393	86	93	376	2548	469	161	377	69	91	105	51	240	1424	215	649	149	2056	539	472	262	280	279	470	1782	736	295	340	283	1364	131	342	544	441	99	289	651	522	20941	318	10134
975	9.4	219	91	274	126	76	76	625	92	102	65	231	2802	751	80	100	123	80	91	70	226	2022	162	1397	127	525	490	256	435	90	371	346	1833	457	259	506	395	1151	131	343	616	370	207	251	259	387	3800	404	9790
976	9.5	65	84	148	84	67	69	114	373	139	62	85	1394	1855	88	988	104	67	188	98	215	2465	219	876	345	312	537	263	188	223	354	319	570	376	372	518	400	1379	167	266	1126	419	310	324	109	232	3997	368	5707
977	9.6	80	70	831	96	85	56	80	501	156	59	84	1946	1640	56	1288	70	71	84	89	117	1232	242	1400	278	917	326	152	189	78	200	327	424	176	376	444	307	2576	183	251	1076	342	275	99	345	280	3003	249	6877
978	9.7	54	1098	1355	85	80	54	44	550	146	44	59	431	2333	127	663	51	209	91	583	1331	1016	254	1596	463	1186	385	538	398	279	447	325	536	556	204	161	390	1339	240	326	1098	372	338	331	356	378	434	364	8678
979	9.8	163	1260	341	69	51	56	64	74	124	65	83	86	2445	251	191	72	86	55	237	378	724	190	451	450	832	751	312	218	246	715	274	471	766	254	719	269	6937	232	297	788	442	126	273	218	369	3670	262	8518
980	9.9	426	1428	105	402	104	112	77	79	116	63	462	419	972	315	68	53	127	493	601	430	565	264	589	460	1011	749	139	105	207	270	92	408	275	322	1324	344	8866	676	303	974	316	158	439	195	335	8502	346	7394
981	10	236	1014	186	94	96	205	86	77	418	73	1218	653	697	533	301	43	1397	1320	977	86	813	164	893	441	1043	711	287	138	260	256	408	1019	234	310	628	207	485	221	320	493	389	324	227	259	440	1966	260	6275
982	10.1	79	110	57	72	226	89	74	66	562	56	483	636	116	104	771	76	1148	1552	1510	69	874	153	900	298	527	737	249	185	219	562	304	846	472	169	264	317	6164	195	304	578	350	270	196	247	398	7352	347	10376
983	10.2	381	90	123	73	59	501	91	79	1073	56	229	1171	505	100	538	61	93	114	1521	93	1259	192	953	455	855	397	246	89	281	269	450	1424	725	251	449	349	1690	505	313	607	515	360	276	135	417	12546	346	7604
984	10.3	148	73	673	91	71	1268	84	86	235	34	73	1569	1081	86	1090	616	73	88	1132	49	1408	214	1112	344	1260	656	272	241	172	204	451	1340	699	288	563	260	4168	615	247	491	351	132	103	235	381	16516	382	6347
985	10.4	508	109	753	124	85	534	164	60	685	65	37	1207	2668	586	1180	1004	61	93	1696	234	652	376	2121	282	909	489	453	140	109	407	299	425	342	237	734	363	9941	420	336	918	302	111	175	252	337	13836	253	3403
986	10.5	359	120	62	95	77	776	95	102	108	54	76	2415	1697	637	119	948	64	80	909	92	1495	442	991	294	775	512	248	333	101	360	104	731	584	322	755	349	11704	546	406	443	302	464	410	217	431	6830	249	2966
987	10.6	236	90	67	98	62	768	94	76	88	50	242	439	2787	670	201	1668	105	113	85	61	1229	464	869	274	679	378	295	397	71	465	534	686	438	384	572	186	2939	820	215	344	352	153	224	156	329	10969	221	10312
988	10.7	99	58	139	535	88	73	450	26	92	53	101	491	4502	899	80	394	77	180	84	202	553	338	1014	530	566	657	209	242	245	364	313	763	550	266	158	284	364	470	328	400	447	123	385	347	396	384	289	7968
989	10.8	76	72	57	963	200	123	475	104	86	202	240	106	2476	1380	67	57	83	584	81	66	580	224	620	326	924	505	169	160	294	213	274	515	700	220	496	500	8829	284	294	642	330	261	224	329	345	233	257	7531
990	10.9	101	68	74	1383	94	94	82	165	119	360	150	78	962	92	78	65	202	914	75	97	385	305	731	584	851	694	374	186	350	462	382	467	543	384	395	293	2853	479	240	1305	302	303	132	155	449	655	293	6652
991	11	102	44	60	729	89	85	74	516	386	69	373	78	836	495	193	99	59	1198	333	98	562	281	719	348	1300	477	229	134	230	342	214	494	843	402	1129	162	6176	826	310	1082	355	373	265	330	447	136	314	8123
992	11.1	291	61	115	139	96	60	66	495	98	368	112	122	881	241	57	96	726	1374	61	108	524	287	1554	577	1256	779	223	395	225	369	185	664	731	408	1365	318	19238	738	285	983	398	296	167	205	313	180	327	8653
993	11.2	84	58	130	213	68	90	99	99	117	66	85	102	1506	247	72	65	452	805	56	88	854	260	1388	283	1246	502	208	375	156	526	133	596	541	205	464	264	3753	888	256	1442	366	478	482	101	412	228	441	8400
994	11.3	489	80	72	97	72	132	72	415	372	60	67	314	804	994	69	50	176	1500	91	73	962	294	1116	202	1169	349	322	375	262	478	246	916	515	189	1002	305	1149	258	275	1668	393	182	222	160	401	366	418	8284
995	11.4	525	47	73	535	49	204	66	204	83	64	107	108	618	74	63	209	957	1398	91	17	1054	384	678	352	577	632	238	255	162	396	126	712	522	333	396	394	22903	668	286	574	294	162	165	90	390	667	335	9036
996	11.5	85	109	96	821	727	77	42	84	117	95	56	118	3092	101	52	228	585	167	94	11	218	507	1457	459	323	595	190	130	260	563	326	923	257	307	393	430	884	1230	344	568	380	307	414	324	419	3240	221	3764
997	11.6	64	98	50	75	576	339	78	43	107	101	49	1010	3697	158	70	1054	84	55	67	68	221	398	873	540	385	450	275	116	264	438	282	3153	244	193	360	477	106	793	321	199	452	462	288	149	407	3787	288	9001
998	11.7	74	524	53	76	1206	93	70	97	82	257	57	2859	5740	106	839	868	95	89	68	69	159	289	990	246	572	611	94	105	161	339	207	1281	361	364	503	340	2947	1108	326	256	418	528	206	154	486	12524	491	7609
999	11.8	112	1435	98	94	933	72	625	64	96	133	1175	965	2297	73	560	373	81	605	99	1406	553	171	1066	374	1493	841	367	178	154	278	205	1055	381	301	342	255	2983	725	260	177	270	193	210	258	218	3057	253	8882
1000	11.9	81	126	65	61	1234	50	99	68	90	86	2057	1788	2675	74	715	95	103	82	87	601	512	124	1031	402	700	401	359	68	147	367	300	1410	275	304	430	336	6213	294	319	305	443	290	266	146	427	192	157	4578
1001	12	78	197	304	87	221	296	86	44	102	82	831	1032	1596	75	310	67	68	119	93	407	626	127	1456	293	228	1055	349	102	243	189	245	1217	430	337	470	328	489	341	276	969	441	159	185	222	321	286	163	9886
1002	12.1	98	432	1618	286	89	88	52	65	111	71	703	457	5234	61	104	66	151	95	87	505	406	372	637	636	255	682	359	272	267	229	211	1390	434	218	734	317	10247	949	308	339	798	216	294	244	370	466	177	7995
1003	12.2	62	161	208	86	66	48	48	44	312	65	421	1898	4780	141	93	96	163	123	596	66	462	228	757	571	480	572	248	66	243	403	625	620	350	291	450	276	11874	766	253	476	532	230	319	223	361	10578	296	9679
1004	12.3	460	129	113	97	101	65	53	34	100	92	132	821	4957	93	468	56	423	112	1508	100	463	253	939	316	502	906	328	181	271	460	403	874	328	278	484	287	1208	795	223	710	735	249	310	240	405	13873	254	5274
1005	12.4	94	71	82	73	98	60	51	72	109	71	126	310	5114	272	1282	51	106	409	512	64	397	270	1248	341	459	733	391	330	149	409	368	683	385	246	434	211	2130	818	300	815	470	141	159	261	440	1351	223	8867
1006	12.5	364	108	101	83	57	100	98	83	82	90	605	280	3927	144	89	188	95	151	285	464	428	357	791	337	418	903	420	104	211	352	209	1234	310	295	433	291	9558	1006	347	1560	520	242	418	218	365	5121	281	3790
1007	12.6	88	110	70	66	38	195	99	106	61	568	858	241	1105	135	207	1275	84	101	909	1407	820	448	971	434	469	554	283	206	283	348	267	545	611	220	465	433	5924	1055	407	853	381	409	309	214	383	451	191	4131
1008	12.7	99	103	95	92	66	1831	84	106	93	507	213	78	1886	108	56	1259	210	96	184	1373	382	390	839	463	1016	934	186	76	318	463	109	728	447	187	612	357	662	506	321	725	495	199	522	345	312	492	303	7125
1009	12.8	275	112	651	408	64	2348	93	89	96	59	308	332	1293	266	1267	576	806	86	62	701	620	107	1775	290	335	885	287	295	208	475	246	1839	566	269	823	307	1602	862	295	1125	570	229	70	182	312	851	394	18606
1010	12.9	89	81	1402	1023	76	1456	98	67	644	198	598	298	1198	81	1266	110	928	156	95	149	410	215	531	263	328	731	221	180	306	769	296	545	723	264	245	261	9771	390	305	439	503	187	129	215	325	1019	404	10393
1011	13	78	454	305	1261	68	322	83	61	1096	343	257	317	1087	63	690	82	255	1341	78	99	703	171	774	151	507	1100	244	111	239	786	385	653	367	280	356	488	1405	373	236	649	621	131	201	348	332	1046	331	6736
1012	13.1	65	692	634	98	82	897	95	85	833	86	357	506	342	114	1361	109	77	1287	47	91	472	195	1313	494	311	328	204	347	257	753	298	1591	413	320	530	435	2208	539	192	646	602	209	175	133	332	2096	247	6564
1013	13.2	77	1629	53	101	73	965	84	217	614	71	226	695	279	70	322	99	73	832	85	105	716	212	1039	110	465	1041	279	119	147	845	137	1767	256	205	664	458	10714	679	294	605	547	106	176	556	374	2040	377	4964
1014	13.3	84	1353	52	79	88	318	92	88	344	56	193	789	784	177	69	77	102	2073	260	66	779	196	1283	408	511	912	680	148	198	1004	463	1548	359	375	306	208	758	773	261	597	515	382	159	338	430	2946	269	6605
1015	13.4	80	1008	77	81	395	102	92	195	130	56	202	1811	1697	365	105	63	98	278	44	77	273	224	1577	306	366	795	290	169	270	919	397	2395	153	365	316	220	9939	668	329	718	529	177	245	290	357	1434	377	12105
1016	13.5	96	1459	126	85	75	73	87	222	97	64	101	3295	3604	151	106	76	103	658	97	109	273	427	1703	271	379	630	233	214	208	717	525	2241	252	318	437	263	728	917	289	733	574	365	189	211	431	22899	282	8704
1017	13.6	73	476	56	203	70	35	51	687	90	80	98	1672	1377	304	75	61	60	200	115	687	290	385	814	338	371	588	430	164	198	952	296	1848	426	334	616	380	1393	402	234	988	489	180	234	286	431	647	409	4341
1018	13.7	37	110	46	100	50	71	429	624	366	347	87	927	2997	1096	203	124	343	176	265	139	269	297	722	618	434	1108	221	209	236	569	243	699	353	420	613	664	8312	786	246	1045	844	441	113	169	321	441	380	10363
1019	13.8	57	96	235	84	78	131	619	353	85	459	317	270	1847	464	61	968	106	168	76	76	281	183	1504	228	427	988	145	228	177	467	280	896	553	396	268	568	566	369	289	1118	700	123	169	211	409	1544	293	12056
1020	13.9	56	129	78	124	86	90	1057	105	108	68	176	57	1595	63	75	865	107	154	109	44	597	265	1008	101	389	923	110	107	256	410	258	366	206	251	422	332	347	185	242	1068	585	352	425	199	360	14514	393	12381
1021	14	189	98	65	157	63	95	61	79	414	49	182	115	200	75	480	569	52	483	89	51	2185	240	1391	254	367	865	196	90	202	563	171	589	388	308	504	462	237	270	267	1234	582	197	249	192	387	28734	349	8584
1022	14.1	66	89	93	619	58	74	45	98	105	74	43	2618	948	292	468	114	83	127	83	96	1279	194	826	169	334	904	161	105	241	485	309	304	73	224	955	198	399	197	352	1144	742	117	375	122	429	9693	673	4925
1023	14.2	379	83	82	663	73	93	87	103	116	48	37	2666	740	161	1506	150	64	529	71	97	966	222	2344	341	388	618	276	79	226	428	149	203	470	298	514	365	1262	117	303	1175	433	377	183	282	417	4583	297	4764
1024	14.3	98	120	117	104	413	513	42	112	122	104	33	3564	1649	85	901	828	91	1891	89	98	1774	125	2317	433	378	499	394	91	291	676	228	166	300	239	521	421	295	131	221	958	328	324	432	135	306	20695	283	3179
1025	14.4	728	1501	92	92	89	618	56	186	146	66	47	3155	4259	120	439	283	274	676	81	159	1401	183	2115	302	447	885	235	179	240	671	273	607	478	416	387	434	594	277	360	932	389	261	434	128	307	30652	272	6630
1026	14.5	342	1670	128	117	91	981	334	65	94	703	56	2263	5063	510	121	1108	145	81	121	79	1155	203	2759	646	631	838	312	361	286	641	292	412	356	318	342	493	1010	107	372	926	1105	140	94	152	447	26813	324	4287
1027	14.6	68	1327	102	87	81	1888	177	84	573	355	66	1480	9475	607	247	207	99	81	97	167	921	287	1424	222	617	972	464	139	200	611	404	292	346	227	262	565	944	103	318	680	686	182	307	96	338	2437	266	10353
1028	14.7	80	479	181	389	68	2417	103	91	111	102	448	1563	6535	668	82	157	83	967	278	602	932	299	711	269	629	901	280	157	213	346	359	542	232	265	328	199	882	299	267	873	497	361	221	293	326	6546	455	7028
1029	14.8	247	342	191	1494	58	1026	97	96	102	108	193	2351	8606	78	263	114	586	186	76	898	775	247	2011	398	421	497	256	128	163	520	294	619	522	304	303	226	828	91	308	933	658	343	86	208	412	5171	465	5900
1030	14.9	255	230	1192	1449	157	101	63	52	126	55	118	3246	4916	61	794	89	92	99	97	249	444	261	662	634	983	586	236	200	192	417	504	585	732	285	373	339	478	137	299	1030	927	304	273	90	170	647	466	4373
1031	15	982	225	733	2006	1777	70	96	69	138	94	139	3022	4687	59	68	70	80	100	80	1222	1283	211	2282	76	450	376	394	151	292	381	365	393	511	309	463	330	634	120	207	771	1322	474	388	245	330	1494	419	11991
1032	15.1	264	145	826	1389	1719	89	90	61	371	62	83	1591	6434	62	76	86	211	510	68	139	1726	157	1842	216	364	940	182	280	196	367	337	411	404	285	346	306	579	158	334	740	806	168	305	142	308	10467	434	5105
1033	15.2	118	81	217	108	487	81	69	82	103	61	86	1791	2597	70	65	1216	99	337	80	677	1904	215	980	350	474	502	12325	181	142	411	407	703	513	223	403	322	739	129	275	442	448	230	393	149	636	3266	341	5061
1034	15.3	104	55	133	119	89	99	90	36	107	78	282	2400	5348	82	131	139	87	2034	97	1922	1456	169	2054	795	640	973	11631	153	154	428	366	681	415	315	300	155	1783	207	268	254	409	168	210	209	263	248	235	6784
1035	15.4	87	725	312	89	101	120	399	141	118	61	378	1527	1982	63	73	1273	94	858	118	261	1210	166	1619	1048	1279	922	7056	90	217	753	504	602	456	414	258	294	483	113	272	896	485	304	354	265	335	293	227	9487
1036	15.5	75	153	206	111	73	592	95	98	80	68	197	1248	3809	60	254	455	76	102	109	742	2150	237	2152	916	2276	644	3744	335	189	617	262	719	224	193	323	412	2121	158	322	258	968	402	80	191	373	366	296	5305
1037	15.6	67	76	96	96	71	481	122	64	89	594	230	1005	1028	340	774	374	90	48	113	70	653	159	2108	1033	952	1103	6771	135	270	407	236	1510	272	215	287	346	491	128	230	649	516	312	253	262	321	1611	299	4296
1038	15.7	69	101	260	96	82	109	95	91	81	120	192	1523	6018	433	750	94	105	66	93	163	635	156	1592	688	485	795	2871	254	230	374	305	778	243	349	348	295	1730	123	364	299	938	426	85	203	249	6253	388	7457
1039	15.8	70	62	268	263	74	68	92	99	175	242	176	1288	5192	114	111	78	72	113	109	233	953	244	1440	137	1032	732	6330	81	141	299	253	919	412	288	257	337	834	110	316	393	1437	153	211	237	289	1155	6974	8837
1040	15.9	68	288	268	83	82	62	74	87	380	82	59	794	5278	79	84	66	55	174	63	49	790	218	998	200	1589	297	3142	269	155	207	342	796	425	250	279	288	1019	122	359	836	916	162	226	286	278	1599	22676	5120
1041	16	31	1203	46	80	83	73	92	55	290	86	98	226	6200	101	79	76	186	509	76	154	772	240	1471	170	1017	649	3190	208	250	253	223	244	415	359	384	227	694	100	287	525	1118	66	363	143	356	292	27085	2309
1042	16.1	114	968	68	83	74	99	88	60	1015	106	77	498	3572	136	240	98	45	464	88	222	1537	388	1570	685	1846	992	3956	436	229	500	299	319	256	352	535	419	586	93	406	414	594	92	465	190	278	3264	21735	4206
1043	16.2	79	158	60	206	424	88	407	43	546	193	119	522	3688	107	78	792	154	157	87	45	1204	150	575	298	781	610	2247	391	257	555	423	1078	336	306	587	424	385	148	274	433	331	350	290	186	374	3081	21614	7381
1044	16.3	81	90	68	110	755	124	172	47	290	53	95	1869	4683	312	84	524	569	59	347	504	1444	246	1744	137	1348	739	3881	281	263	441	360	1330	371	321	283	415	619	110	242	338	891	74	280	417	376	1371	26626	6849
1045	16.4	77	38	77	141	166	87	83	69	858	61	215	902	6632	191	203	535	1366	90	306	97	1298	269	840	203	859	843	2564	209	230	195	391	1353	591	218	537	276	2480	138	302	307	660	208	90	245	293	141	22091	5763
1046	16.5	54	65	197	204	74	323	61	75	99	121	198	620	5628	453	59	492	722	96	265	739	1471	247	1410	146	1521	1286	2723	195	286	383	322	1207	416	253	466	319	1732	224	263	561	764	327	354	288	256	216	21154	2645
1047	16.6	64	44	980	641	64	321	56	80	363	76	203	158	5103	356	98	82	1040	922	761	515	1862	144	1354	222	814	342	2424	215	224	303	130	1216	363	630	373	521	1382	116	336	524	1016	158	142	216	355	407	20019	4722
1048	16.7	78	503	78	1708	59	82	46	99	97	60	303	126	4075	346	75	121	644	1414	658	669	2049	300	1950	313	963	1089	2922	150	80	343	313	926	426	174	336	352	3034	122	266	681	641	351	273	419	205	394	18281	4684
1049	16.8	131	2182	93	1033	62	79	56	72	99	64	205	145	2928	112	132	195	114	1466	76	671	1960	217	2097	353	763	651	2861	122	274	360	494	1139	407	201	412	438	544	143	553	892	882	183	395	211	401	662	17774	3524
1050	16.9	91	886	66	328	107	125	463	75	82	230	302	564	3645	130	58	110	151	101	97	1660	678	185	1600	451	1526	644	2265	246	173	418	303	1391	320	286	479	350	588	109	247	1119	826	298	370	316	441	1998	14807	6679
1051	17	95	1084	52	610	53	67	1254	236	80	77	143	1004	4049	394	77	358	54	108	84	261	1898	215	1623	396	1085	257	2075	207	338	419	119	763	485	149	397	309	905	207	601	1311	519	321	239	282	225	2775	13332	10070
1052	17.1	93	776	60	69	73	62	1258	609	110	193	90	2088	2676	384	52	1436	78	968	291	143	2346	506	1071	257	1577	923	2684	187	222	252	537	430	223	246	426	259	1670	260	410	1030	396	179	105	338	267	1747	23356	3589
1053	17.2	79	71	54	1315	90	65	107	274	336	64	192	3438	1514	67	102	135	69	1258	104	271	1379	444	2850	165	1062	1235	3211	83	324	366	252	1267	472	187	363	347	1696	230	560	1204	298	108	158	205	257	316	19179	811
1054	17.3	53	82	105	2337	80	72	84	146	1296	34	206	6334	812	80	884	101	86	690	85	515	1216	331	1207	261	1015	685	2030	180	263	480	425	1296	494	136	458	342	1050	323	410	958	278	312	98	242	371	391	23343	6866
1055	17.4	58	154	89	3236	64	29	105	91	412	72	280	8330	1351	5565	1058	88	436	861	94	1001	2006	219	1486	505	470	1115	4756	68	300	203	288	1299	444	281	315	222	1345	464	365	1347	337	376	270	383	323	1473	17890	6956
1056	17.5	80	65	243	5581	81	47	85	294	1091	78	81	7599	878	12928	910	62	77	316	90	1065	1417	275	1401	429	925	467	2383	120	298	295	279	884	360	177	325	290	1846	478	455	695	558	294	478	484	288	892	20710	7951
1057	17.6	70	77	1354	6900	61	51	441	160	972	325	75	7431	3552	14565	1005	425	427	531	96	1047	1566	176	4633	237	1354	279	3394	237	272	442	345	1299	966	236	366	549	408	426	292	682	736	311	92	262	354	107	12227	6252
1058	17.7	167	248	133	11133	54	62	575	88	463	86	103	8233	2055	17108	62	1305	272	77	93	698	1685	243	1682	240	390	890	3106	125	273	354	500	688	752	214	439	502	339	424	374	1389	630	405	124	215	203	536	16145	4216
1059	17.8	64	133	67	8987	257	47	182	146	995	64	67	8286	901	14489	60	902	428	79	93	95	1475	207	1013	180	767	1621	1933	179	298	617	287	506	320	122	462	345	309	395	394	865	829	230	142	354	229	520	9620	1741
1060	17.9	200	77	107	14385	1616	111	74	96	100	180	394	8356	699	11771	71	167	224	95	377	92	2070	217	1366	163	509	898	1067	215	296	505	302	327	240	162	413	273	786	400	402	1180	705	500	333	275	241	805	16987	2857
1061	18	97	74	59	6670	1334	231	37	77	103	78	105	8344	634	10438	81	296	170	88	102	82	1555	288	958	284	458	835	2467	214	3923	292	236	620	448	116	371	506	2154	678	363	1169	515	211	293	352	430	677	15235	9592
1062	18.1	115	373	211	6484	81	114	25	49	268	76	60	9414	86	10101	517	288	251	458	149	108	1171	454	438	232	533	957	1964	237	4911	133	385	661	446	256	457	588	596	611	314	1189	428	243	234	384	389	582	5981	6077
1063	18.2	701	185	80	6325	99	61	68	55	324	48	96	8262	239	7565	77	198	131	121	57	100	1872	292	548	230	411	832	3312	508	3765	226	173	563	525	644	424	376	786	494	313	916	493	144	107	303	314	668	3004	6274
1064	18.3	1126	156	56	16331	178	62	78	95	449	52	68	8075	473	7590	66	808	132	113	90	65	1082	149	397	398	335	696	2537	133	3611	354	406	805	483	311	521	278	253	2063	769	506	406	402	215	256	373	328	10467	4496
1065	18.4	124	1120	81	5531	58	71	58	59	165	93	64	7392	115	17162	224	1270	353	77	119	130	1048	157	602	323	458	1425	2612	310	2951	876	441	807	472	612	306	420	6470	2023	805	895	395	266	170	228	188	354	11847	2883
1066	18.5	88	1926	51	14194	57	46	72	54	149	423	59	7938	140	14288	58	229	68	663	104	43	1089	246	1793	547	718	370	2051	261	1265	552	449	741	436	459	333	315	526	1336	1542	1038	753	381	204	323	366	251	4160	2812
1067	18.6	77	547	96	14469	106	23	69	86	97	908	117	6964	121	1311	53	188	88	1232	389	69	2285	197	3856	349	1210	879	3924	131	574	400	196	612	374	272	250	359	155	1012	2645	648	354	213	270	320	256	395	3094	5025
1068	18.7	79	113	102	1629	68	32	77	98	395	418	31	7889	397	223	78	70	436	1722	1190	83	1745	208	1745	243	958	422	3348	111	512	346	412	799	309	1296	282	445	1030	678	805	735	349	117	391	121	292	378	12345	9649
1069	18.8	84	119	72	1433	74	370	74	76	454	91	17	3877	143	1186	232	110	808	1282	412	154	1501	268	1778	212	1003	763	2204	203	335	359	318	2495	657	583	275	452	1039	613	3738	510	449	330	224	275	439	1378	15238	4381
1070	18.9	75	144	596	235	62	610	77	63	97	62	58	7233	438	1785	69	86	140	115	692	74	1957	136	719	300	227	561	2362	264	647	879	480	961	366	609	522	311	1036	561	2439	991	405	250	307	235	345	9410	14106	4107
1071	19	37	86	1005	600	72	677	62	210	105	629	50	6464	824	1938	76	422	77	148	761	58	1704	171	739	214	420	370	1951	335	5972	777	185	777	306	1438	339	355	1305	677	5113	841	490	269	81	302	324	837	10660	6336
1072	19.1	84	69	87	108	82	1193	86	202	109	872	150	3859	1376	1746	61	111	67	98	162	66	1322	294	1148	243	651	1285	2951	265	6449	700	244	768	326	616	384	450	935	584	4144	365	508	160	332	137	242	397	4317	10290
1073	19.2	70	77	44	106	97	964	57	104	117	265	203	1812	372	551	65	128	73	203	100	97	1723	261	561	170	266	651	2682	248	612	718	315	554	509	378	231	410	1626	740	3874	519	325	263	99	175	249	719	6050	4492
1074	19.3	80	79	59	108	258	988	55	104	97	51	48	2125	1166	911	387	98	91	74	78	219	1670	197	1658	160	507	3360	4011	101	494	712	140	484	455	1384	318	293	503	633	1892	360	417	264	306	293	390	2677	11788	3337
1075	19.4	78	110	69	142	70	623	450	111	376	73	73	880	1322	378	2121	481	135	639	51	183	1966	331	953	156	616	1025	2772	163	581	1155	394	528	607	641	705	360	506	621	543	372	392	327	280	315	380	1332	11544	8212
1076	19.5	69	917	85	76	76	272	98	112	93	265	41	1545	2708	650	926	1088	91	106	108	130	936	216	2012	492	565	940	2542	90	629	759	417	634	260	411	543	406	676	684	375	306	411	377	292	148	417	1701	5108	10184
1077	19.6	97	705	105	126	93	87	551	98	387	133	39	1557	3062	1492	168	1029	93	103	79	1109	2602	277	1406	341	788	270	3291	291	539	559	290	172	620	371	342	420	665	1370	418	116	634	320	444	214	303	451	3020	8735
1078	19.7	86	2028	70	921	85	84	1454	74	106	129	1062	1160	2182	1842	77	470	95	118	62	1853	2296	171	1733	352	566	1985	3573	129	451	539	289	212	486	691	610	380	211	999	382	110	341	321	375	216	312	446	555	10914
1079	19.8	235	2748	760	988	87	83	776	117	89	82	632	2781	2939	507	64	112	693	595	86	271	1812	343	644	252	357	10181	4088	85	473	397	375	719	595	802	188	333	584	641	359	141	471	140	217	366	302	560	3800	8207
1080	19.9	255	204	121	100	45	84	97	157	80	799	298	2760	6012	66	522	78	584	2437	97	75	2410	180	985	418	307	1052	3199	129	422	260	393	1820	414	1025	1122	466	581	689	336	118	499	114	149	201	238	587	2657	6508
1081	20	504	108	125	115	71	62	101	98	360	207	72	2758	3773	102	1152	58	99	1351	529	68	1336	175	1701	500	419	948	2920	132	567	626	274	1728	900	441	1892	509	859	551	438	401	447	246	244	248	279	1630	13874	7951
1082	20.1	513	284	798	110	44	99	77	101	101	90	46	1270	1501	734	736	95	109	1606	97	183	1616	239	1444	348	416	464	2932	127	542	764	297	966	809	857	378	510	2262	1235	400	447	279	72	228	202	373	1662	4281	5957
1083	20.2	57	468	132	108	70	84	288	80	131	70	1174	2205	1101	687	64	75	91	429	66	94	1415	203	1095	172	497	1115	4249	231	503	749	220	787	618	728	740	531	854	646	405	464	404	155	518	494	279	364	1693	3607
1084	20.3	56	95	135	166	65	50	227	104	288	67	721	1897	815	435	52	83	103	596	72	68	1709	379	1146	451	719	5723	2176	198	445	510	359	863	381	484	418	455	733	498	437	248	348	86	181	486	531	127	1641	6092
1085	20.4	76	77	473	55	76	126	93	107	159	100	704	2172	465	1154	60	985	87	154	53	114	1555	361	1408	352	660	25503	2145	201	463	702	214	1999	435	599	227	345	1287	1343	388	421	461	119	151	349	335	276	3689	4234
1086	20.5	69	69	98	104	68	76	86	81	96	96	67	1353	124	540	68	1114	92	154	106	96	1430	252	2684	269	445	20808	3078	334	438	564	543	2307	768	1017	288	285	880	740	542	563	327	531	253	235	429	616	7499	3456
1087	20.6	67	87	67	125	90	73	78	84	90	70	18	2233	288	113	218	70	89	130	107	903	3454	169	1128	150	548	25235	2649	145	518	613	593	853	589	454	464	240	1019	725	320	399	333	289	187	216	299	598	9271	8250
1088	20.7	65	1143	42	905	51	72	90	49	75	52	44	1225	181	100	84	56	67	116	106	1151	1307	224	971	322	606	9944	2536	246	823	624	731	939	661	494	450	330	290	1696	614	592	251	98	200	196	147	177	11460	6456
1089	20.8	78	1758	45	1045	82	72	108	45	338	173	43	1896	59	81	114	71	77	434	455	71	1480	226	1492	295	547	2302	2164	71	490	687	488	1536	508	649	630	297	2434	569	410	322	244	89	237	121	253	310	4384	6313
1090	20.9	56	123	66	522	398	79	67	91	90	86	44	1110	249	84	592	137	74	120	134	1329	1870	243	1136	250	478	1312	4166	250	468	367	139	1846	708	314	470	323	1443	464	385	454	311	81	87	92	344	3412	2572	5417
1091	21	105	131	57	87	900	73	100	119	79	63	74	1784	80	86	80	468	100	113	75	2523	1301	242	993	207	575	1283	2610	201	471	622	249	1261	585	362	414	389	959	625	682	487	245	62	180	543	206	1043	3697	3676
1092	21.1	228	82	92	126	519	97	103	98	106	85	15	2005	188	153	59	110	96	93	653	77	2486	207	1432	484	491	590	2398	182	496	817	180	850	459	364	562	305	278	585	438	646	413	122	240	300	410	2168	2247	8125
1093	21.2	3296	88	80	84	145	56	106	223	99	54	43	2622	693	102	54	201	84	107	918	277	810	284	825	214	512	520	3191	159	344	397	380	1021	547	441	661	302	3144	728	408	292	305	144	284	306	322	1103	4624	12728
1094	21.3	15063	74	76	92	146	65	83	463	91	71	50	1558	347	96	124	103	229	128	836	52	1906	223	412	151	465	900	2544	88	456	403	567	1131	489	356	414	319	1713	420	467	504	450	144	311	156	192	2335	12405	8270
1095	21.4	17061	1851	62	83	75	88	266	141	423	51	73	1210	140	164	53	152	112	92	93	84	1235	116	1311	292	459	797	2505	222	422	671	323	2220	409	617	518	375	2341	734	441	355	491	326	68	316	231	319	9532	6540
1096	21.5	12959	1386	137	126	113	138	128	214	233	67	40	1946	433	151	80	67	111	121	103	297	514	152	1073	234	397	709	3281	150	446	507	247	2088	579	498	337	354	1255	478	523	233	586	409	216	290	354	547	3152	6798
1097	21.6	2698	5005	244	1411	448	58	443	282	103	68	61	3251	407	700	75	641	81	180	81	316	1309	292	929	148	242	798	1779	275	348	514	247	1162	433	509	257	180	1174	464	462	368	581	149	150	237	424	3406	1360	3945
1098	21.7	13285	5815	95	1318	1050	104	2046	242	81	73	49	3689	122	1657	64	1294	66	1142	611	257	1837	255	1089	258	353	530	1667	135	371	525	700	481	188	438	410	436	2095	494	384	428	548	166	304	207	264	1609	13786	5147
1099	21.8	1929	7000	165	438	927	76	423	344	307	53	86	4257	183	257	50	661	51	1403	92	248	1732	238	838	191	499	452	5304	266	327	338	524	788	227	1026	489	448	539	417	438	234	341	257	223	302	123	366	5861	10489
1100	21.9	826	7820	435	105	73	57	109	889	68	1162	1103	2351	113	88	46	895	28	493	81	72	1024	150	2895	128	401	508	3553	106	413	411	70	1627	302	650	506	283	181	700	481	216	349	73	336	92	339	1523	5104	5807
1101	22	85	8002	7745	777	65	53	111	833	101	346	844	3213	147	719	46	87	223	139	98	33	337	183	1103	295	626	710	3559	59	2651	372	223	1710	597	518	585	326	400	717	450	290	487	60	97	118	516	1162	3699	4837
1102	22.1	81	9646	13769	2009	71	81	348	88	351	1221	94	2006	303	1111	70	76	126	120	109	43	435	210	858	411	575	625	3874	177	9528	589	230	1131	636	565	633	376	336	490	472	309	474	190	388	351	120	1380	4020	3408
1103	22.2	326	10811	16092	783	44	66	90	80	83	143	128	1237	1729	2744	236	92	103	113	80	73	392	273	2081	302	342	660	2282	85	6302	518	378	833	726	573	1129	341	391	660	373	486	658	170	187	127	281	2723	6616	6601
1104	22.3	729	10677	15651	269	26	102	753	73	84	61	315	4115	1052	12714	82	79	311	121	102	76	432	178	1523	574	875	341	4557	185	4366	341	330	2152	572	653	652	342	423	658	561	200	605	405	106	282	307	873	6245	10428
1105	22.4	123	11004	18407	75	33	71	106	73	73	51	132	1965	4007	18500	80	1037	704	122	99	80	374	249	784	402	749	1183	2191	80	3156	276	433	1763	233	406	397	456	414	297	471	501	565	306	202	455	393	510	4689	7190
1106	22.5	151	11203	16977	67	59	140	99	73	82	55	131	4216	4873	18286	65	2209	812	93	300	200	363	287	1533	320	673	1345	5205	325	2914	365	114	2137	664	257	431	267	458	608	497	103	766	157	253	103	318	1253	5646	5582
1107	22.6	91	14215	16072	68	71	444	107	66	103	61	74	4639	5373	11404	724	3586	1422	105	125	233	576	270	1081	286	817	852	1867	113	2605	356	541	1871	589	211	1043	391	527	1135	591	641	601	76	237	254	111	5366	2664	6891
1108	22.7	70	13637	3426	114	537	326	88	512	1222	47	53	4255	7373	719	1187	6688	741	470	112	73	558	161	1200	243	738	757	2395	146	1941	541	102	1504	496	250	694	407	888	1523	474	368	719	77	208	250	235	1211	3004	6166
1109	22.8	102	17333	245	136	345	149	123	432	732	84	67	4199	7454	1431	1167	10239	96	103	106	79	147	255	1245	203	564	482	3214	147	935	474	354	2279	462	254	924	244	2848	1144	372	530	580	322	281	178	243	2449	2591	4912
1110	22.9	213	4922	546	161	80	184	87	111	559	62	87	1599	9199	121	77	13377	116	97	69	84	248	198	2157	403	1270	1038	3125	157	2358	383	345	1811	397	303	327	368	760	1197	364	288	436	98	151	235	415	1532	2259	2188
1111	23	89	1692	1640	1691	90	294	97	91	613	73	79	1087	8058	115	77	11601	123	67	106	45	1021	123	2359	407	558	1079	2401	185	1550	360	297	2365	394	353	755	604	430	812	377	199	380	91	326	393	377	3272	4656	7692
1112	23.1	62	2390	2159	1328	84	1052	116	98	670	255	67	569	8444	234	97	4162	256	93	77	100	2843	297	3100	122	468	2184	4357	241	1283	335	237	1579	877	397	803	339	800	666	522	232	315	125	339	284	394	1516	5108	7685
1113	23.2	113	7467	10570	1053	49	1393	235	48	94	85	512	2396	8351	286	96	6129	126	277	85	2232	629	259	972	433	1180	17739	4126	127	653	361	329	1733	581	917	498	383	793	847	483	294	488	236	336	133	189	2838	5202	5787
1114	23.3	265	7971	14425	771	82	1580	177	76	88	80	215	2109	9053	77	48	7132	146	88	104	4207	672	214	3093	155	894	411	2846	116	376	540	689	1587	775	686	310	319	253	930	590	436	780	464	564	222	307	1020	3483	4290
1115	23.4	63	12342	767	92	387	1955	70	96	115	317	82	884	8921	82	178	8365	133	86	157	5585	748	263	645	320	1156	725	2415	199	351	335	398	1844	571	664	1323	312	2030	1535	492	248	377	240	237	112	425	1215	4188	2940
1116	23.5	120	7707	728	73	88	1101	706	96	109	86	61	1611	9472	85	56	7382	883	802	966	11332	847	329	1021	151	1089	1803	3975	203	411	375	151	2759	681	472	758	502	2709	1357	445	511	442	103	193	173	472	650	3970	4899
1117	23.6	619	3027	1526	132	150	1387	2269	184	106	70	156	1539	5625	122	66	10472	562	1298	2555	11544	508	260	2866	346	1296	1647	2116	163	401	325	274	1483	558	334	322	341	876	950	442	340	395	199	428	249	360	418	1150	10442
1118	23.7	266	1664	778	269	824	545	400	107	1034	91	107	2994	7267	127	67	1714	591	612	9904	14423	529	146	2117	410	1499	3557	3785	93	368	390	520	2061	624	413	492	402	3829	625	525	440	450	183	338	208	426	2016	3520	4800
1119	23.8	69	3492	480	131	59	96	70	61	796	471	171	1654	5252	1762	73	4738	195	53	18822	13769	611	196	1262	423	617	2864	3282	245	413	461	186	1877	726	349	652	289	622	440	449	454	439	271	3156	377	158	1194	5352	7383
1120	23.9	97	552	182	91	77	154	101	197	2179	819	391	1910	7168	1190	76	11212	93	43	17413	12717	554	223	2018	323	948	6725	3123	107	402	263	88	1270	981	339	343	450	557	1042	513	285	348	107	4709	118	205	1250	2278	8399
1121	24	51	1134	122	121	83	193	112	94	3469	183	200	2075	5577	1842	77	6339	93	477	17356	10878	545	262	973	344	560	749	4185	86	445	303	344	1691	850	403	224	234	3315	822	560	386	352	107	5542	200	214	1058	1943	3268
1122	0.1	201	553	225	1384	79	569	97	90	3844	105	1106	5929	7504	1800	168	4100	104	1904	17469	13697	519	337	4051	1344	518	1119	3663	148	457	381	147	1192	546	387	414	369	2828	922	495	208	480	132	7542	172	469	902	804	3829
1123	0.2	66	83	343	741	113	163	86	81	5295	67	521	7112	8656	1492	96	4191	64	1282	17793	7144	692	252	1411	8210	310	526	3814	136	353	613	180	1505	557	315	417	421	1066	715	312	395	483	248	6045	176	441	645	12208	2922
1124	0.3	64	119	1375	81	422	90	144	87	4692	55	541	8719	9159	1299	104	1004	186	952	17215	6534	829	197	897	3860	565	686	3446	142	376	538	132	2208	584	272	376	424	1503	513	382	375	523	113	6521	242	284	761	7317	6925
1125	0.4	68	113	267	109	180	132	366	66	5286	52	325	8859	8595	135	59	782	178	1694	16115	5840	2365	234	1743	4157	365	902	4327	115	393	315	172	1082	413	216	323	442	1678	767	342	528	535	142	6327	342	412	1754	6072	5942
1126	0.5	54	74	219	100	87	131	183	134	4376	61	168	7891	5866	320	74	268	197	188	17699	7383	3174	208	1212	4243	513	1195	2919	142	467	742	100	1090	574	293	494	289	1738	1165	372	324	604	63	7815	125	125	943	1759	8090
1127	0.6	357	96	175	93	75	158	214	70	4002	81	92	9285	8883	141	128	347	73	238	17304	2263	1673	278	1215	5992	303	521	3934	197	270	707	82	1807	652	296	478	324	5495	989	401	251	549	294	5226	245	249	4252	1185	9636
1128	0.7	1289	91	557	137	88	483	190	61	3565	73	89	8976	10218	130	1189	747	78	158	17432	240	2316	416	2293	4497	552	3245	4925	286	411	198	464	1867	476	278	536	433	3838	737	300	480	361	94	4219	192	418	413	6524	6007
1129	0.8	1165	261	120	451	55	77	277	56	4377	72	449	9587	7423	1145	561	125	122	77	15786	727	1778	392	1163	1599	374	31710	2412	158	350	563	504	1756	663	278	341	401	585	601	370	427	469	578	5621	206	374	587	6545	7357
1130	0.9	129	100	390	138	112	67	565	49	3193	65	833	8003	5897	361	106	110	67	88	16026	1209	2463	237	1212	1661	446	27829	3769	190	389	452	294	1757	800	449	276	487	5829	1174	403	246	220	87	2241	216	175	528	539	6818
1131	1	67	89	1926	147	75	78	158	59	4825	92	322	9106	10948	740	102	295	214	98	7882	245	1082	249	1296	3042	485	27559	4887	239	445	272	234	1779	853	651	283	425	814	1417	315	185	230	198	3942	172	304	282	5567	6945
1132	1.1	46	67	2955	115	90	66	134	41	884	548	234	9348	9286	113	97	100	385	95	819	222	2810	194	1916	1389	409	8156	3585	328	302	259	294	1208	218	585	307	303	328	1220	434	266	303	143	3978	147	226	1054	3128	3597
1133	1.2	40	96	4858	84	70	605	123	48	147	87	291	11467	7029	94	212	317	1116	402	8195	216	2116	209	1068	2042	421	11202	4085	231	432	382	207	3582	591	312	265	348	263	785	358	94	476	137	3039	87	264	1330	2105	10621
1134	1.3	82	426	10595	94	52	627	112	324	124	83	407	8914	8527	130	131	310	1128	427	17126	1418	2253	267	2658	2682	430	2439	5305	238	346	472	728	1671	153	389	582	284	3796	1032	280	700	228	212	4177	222	298	856	621	6378
1135	1.4	71	73	11028	660	89	694	115	178	104	77	627	8343	11002	172	94	462	956	74	16415	992	1799	162	1717	1631	767	642	1797	194	270	387	175	3040	367	368	296	425	4604	839	306	271	264	109	840	115	335	1211	4744	5918
1136	1.5	70	67	10037	116	263	575	129	82	59	80	237	5886	9482	332	95	846	86	92	13032	309	1992	292	1721	2154	652	3835	2829	205	389	472	110	2092	623	407	773	297	838	680	269	217	527	101	5602	90	367	3867	12466	6383
1137	1.6	72	110	3250	273	71	236	95	101	82	49	114	7595	9655	1383	103	976	80	84	16655	304	2355	236	1586	1494	344	1182	3107	341	376	428	205	3371	410	450	775	329	702	1104	342	505	359	241	7295	204	391	669	3090	4322
1138	1.7	74	82	1507	101	58	81	76	75	101	67	133	5818	6320	1304	90	190	86	118	17864	763	1194	240	2749	2284	474	6830	1863	231	329	321	72	3137	381	433	751	286	1252	1220	452	432	363	262	1828	141	293	1136	1959	9034
1139	1.8	149	95	3490	714	56	52	121	57	129	84	124	3004	1318	98	79	1414	82	76	19361	1431	1429	258	3155	2745	332	29623	5485	232	358	435	128	1600	628	457	610	294	635	641	447	313	456	270	4426	117	257	2559	1504	8422
1140	1.9	64	80	2582	833	29	61	466	135	367	106	105	2162	969	108	66	698	110	99	16888	103	410	347	1731	1411	299	30179	2376	109	364	471	528	839	626	585	383	402	1831	1628	389	250	525	170	7861	202	164	422	1219	4778
1141	2	63	440	992	695	94	52	125	67	816	165	84	2409	723	329	106	1696	96	285	17209	83	1251	228	1293	1875	549	11983	3422	249	297	406	329	653	503	473	558	361	424	916	446	245	480	75	6121	86	393	566	2424	4501
1142	2.1	149	1146	10580	164	62	140	104	262	111	108	383	1530	2561	66	62	956	174	87	21623	67	1959	117	1505	1216	1427	14066	2276	381	331	553	175	1359	518	537	390	372	328	1104	227	413	271	69	3528	267	249	1607	1665	10974
1143	2.2	76	1008	6864	148	112	66	86	607	115	95	401	2257	3007	68	65	1082	114	277	21372	50	1793	222	2134	1610	1722	4953	4622	240	446	260	121	2147	521	525	192	338	484	1189	254	341	329	58	3776	176	227	831	5298	7474
1144	2.3	236	1001	1038	140	107	93	94	454	128	90	203	3084	1554	77	64	293	108	172	18700	92	1434	241	1145	1383	3349	4277	3511	137	494	206	440	1819	567	592	370	317	703	438	383	371	524	56	6424	305	371	2464	367	4428
1145	2.4	98	1132	549	59	193	48	108	169	145	278	276	2702	2382	235	82	664	90	164	11944	85	1213	215	2432	1474	975	10148	2579	344	490	170	156	2215	477	418	611	417	898	550	359	504	357	159	4555	444	383	480	1476	3996
1146	2.5	67	573	192	112	186	88	114	80	466	106	306	1489	638	99	45	296	92	106	3175	185	2311	401	4654	1703	761	908	5875	128	460	513	288	2184	616	1259	595	435	462	1036	426	278	348	166	5057	392	387	210	5304	8030
1147	2.6	96	184	116	264	75	148	126	95	945	126	375	993	903	108	925	345	90	145	1349	1279	1971	145	445	1069	830	1363	2401	134	383	601	150	2936	252	234	607	323	439	668	367	337	454	118	6252	138	473	2765	2689	6239
1148	2.7	168	77	90	834	75	431	69	207	105	143	74	2284	399	74	724	371	121	133	1115	3142	2074	233	1228	1621	949	341	3569	175	356	603	463	2804	246	424	572	302	3018	699	371	811	469	102	4497	109	384	673	273	3080
1149	2.8	134	97	273	776	74	377	142	133	99	708	71	2005	571	62	744	155	79	122	1167	3705	1232	395	3199	1118	933	590	2093	225	432	210	327	1983	377	359	440	318	612	1080	333	747	385	223	3913	185	267	763	403	7394
1150	2.9	776	46	154	375	935	813	117	115	74	230	82	2088	854	105	109	267	64	100	1006	2292	1513	275	575	1267	815	886	2522	113	350	511	214	630	662	183	442	273	2787	1729	423	325	352	89	3407	353	305	1168	213	7767
1151	3	177	44	223	106	1162	727	91	509	75	221	262	1848	1106	74	83	590	61	85	1366	870	1174	208	1853	1058	1410	614	3223	116	407	439	150	2280	466	210	526	372	821	740	342	150	484	118	2103	134	365	1085	14191	5057
1152	3.1	76	269	582	133	267	1468	90	1186	98	72	595	1062	162	104	54	70	325	88	824	2040	1694	267	2963	1526	746	322	2397	100	576	615	155	2195	264	497	396	388	1135	539	303	380	305	486	606	220	420	857	1853	1770
1153	3.2	73	83	1395	117	83	178	78	769	103	72	314	1869	617	135	64	137	225	96	340	1027	2243	221	1435	1458	806	884	3912	121	423	544	285	2051	409	478	478	210	1019	1214	392	272	660	289	2838	308	258	2813	516	4302
1154	3.3	77	96	214	126	77	359	153	94	108	65	398	2852	628	995	58	167	912	394	999	1228	1788	227	1528	1221	1179	572	2564	170	366	608	300	2426	259	307	467	338	529	1555	426	327	805	105	5662	241	277	358	3438	8598
1155	3.4	49	117	111	101	368	80	443	74	112	78	308	2150	183	407	296	70	905	310	75	2438	242	270	2917	1169	1067	412	6704	167	534	346	372	1785	664	310	881	400	4011	589	381	437	682	78	3890	257	506	3380	1903	6599
1156	3.5	69	70	94	99	845	80	193	82	99	54	213	1986	1398	1729	106	94	400	991	76	452	552	281	3504	2027	846	299	4152	180	584	361	271	1424	821	358	802	357	3185	1733	557	477	667	143	2123	153	352	398	2865	3777
1157	3.6	114	69	99	155	738	72	1440	67	103	75	126	1924	838	715	70	53	131	2135	88	71	358	264	1278	1468	1011	987	3173	131	344	343	105	2107	387	422	641	311	214	1031	444	309	724	152	2327	152	319	6474	1663	2117
1158	3.7	42	529	229	1003	151	61	736	40	99	70	70	779	294	103	70	226	314	262	90	78	259	172	905	1631	404	634	4462	185	380	656	285	981	505	436	778	404	3607	428	283	397	643	503	3361	237	276	1364	4282	4592
1159	3.8	106	1551	88	1011	89	38	985	82	96	135	34	2587	955	357	74	1922	234	104	137	69	366	246	1414	1246	279	860	3930	138	386	277	267	1865	594	374	238	392	1254	1552	316	427	795	121	3034	75	220	756	1266	9973
1160	3.9	915	979	89	123	90	74	1247	190	87	558	80	1386	1911	1464	67	1211	745	105	99	141	230	154	2141	1640	639	519	1816	149	482	380	351	1529	420	376	446	335	751	4657	339	459	481	348	2393	307	121	252	2394	4948
1161	4	53	100	406	86	94	75	276	100	89	76	70	1554	3183	1764	67	910	312	589	95	59	363	216	1588	1472	726	1002	2929	153	492	687	182	1623	366	442	300	421	1743	1444	306	379	398	164	1700	297	463	1648	4845	5010
1162	4.1	75	81	404	104	48	79	182	89	313	71	60	1449	5622	1099	235	124	92	1627	87	308	1101	200	1361	2497	441	441	3254	181	595	398	223	1043	439	614	594	380	1221	345	365	233	494	188	2767	204	299	338	4281	5691
1163	4.2	63	86	107	69	95	121	138	93	172	111	321	1309	5939	134	97	419	79	147	94	1145	1735	197	1082	1618	672	1550	4744	212	363	1164	183	2713	534	416	297	351	3605	405	246	328	524	57	2071	232	403	469	1521	4621
1164	4.3	59	71	79	74	58	426	49	80	410	62	84	2420	4331	116	214	644	185	106	67	2384	1354	163	2681	2121	580	595	5046	187	471	586	135	2400	510	460	234	303	699	324	305	232	618	152	2948	257	248	1008	316	6016
1165	4.4	60	58	93	107	93	1062	93	88	402	77	98	1874	1485	107	50	121	94	110	218	1124	1177	219	817	1315	1472	791	3153	162	264	411	409	2471	433	450	521	523	288	426	237	223	601	294	1597	297	294	640	3186	8121
1166	4.5	63	79	71	97	94	1197	85	89	130	75	86	414	732	117	63	184	118	99	91	520	858	387	1466	2481	440	931	2381	109	294	390	363	888	657	467	795	297	8712	660	235	198	651	210	3519	308	324	264	2191	5145
1167	4.6	100	80	87	80	69	2592	102	84	123	293	66	2246	3187	88	62	90	92	118	70	838	947	454	989	1687	340	553	1631	97	489	462	273	1654	488	669	539	329	1446	1502	301	175	709	63	1567	250	436	462	591	2484
1168	4.7	64	91	91	80	73	1215	58	87	124	110	53	2059	2288	528	57	83	110	56	348	326	628	303	502	1463	413	736	2291	155	453	633	414	1432	581	1018	388	321	1382	901	326	139	721	80	1672	217	200	371	1887	4982
1169	4.8	297	88	567	93	56	890	87	63	108	72	109	486	4471	1336	187	273	68	124	795	349	612	168	2185	1329	205	584	1970	170	356	413	280	3033	565	512	467	484	1609	534	352	429	1452	71	2898	325	342	483	1499	1981
1170	4.9	155	404	337	335	78	624	230	64	87	105	92	651	3317	2812	70	1131	117	349	90	267	522	266	2415	1836	536	525	1651	220	354	478	296	2719	308	752	880	461	1589	155	302	200	902	133	1424	311	287	417	468	3767
1171	5	101	115	193	586	92	112	260	85	98	71	78	198	1217	373	77	81	413	114	749	113	436	196	1920	1379	602	387	3220	120	334	364	175	2752	850	355	840	411	2050	301	326	206	457	187	2356	227	456	579	6834	7119
1172	5.1	69	50	137	752	142	83	334	66	125	83	76	995	1314	112	59	62	93	89	1017	102	429	204	2848	1349	718	947	2150	222	562	406	405	1169	469	311	448	306	863	349	440	329	406	400	1470	346	377	513	3148	2880
1173	5.2	79	45	67	190	414	74	838	90	332	61	88	267	318	128	74	91	102	109	834	1033	1018	171	791	1173	511	833	3426	119	497	306	291	3335	343	373	757	415	602	196	353	407	470	115	1812	271	195	523	4888	4779
1174	5.3	119	58	92	84	316	72	1715	69	408	65	76	1612	1394	121	70	67	58	77	687	3142	558	213	1757	1568	1535	604	5001	227	693	248	630	1473	780	353	741	428	4527	158	309	632	595	411	2740	352	349	384	1979	6768
1175	5.4	60	35	63	77	80	215	1161	84	103	51	47	2096	1016	148	67	88	39	57	86	1276	363	208	1004	1748	855	501	5249	159	428	172	71	2022	473	571	864	484	9602	117	247	312	547	76	3312	207	382	383	1077	8658
1176	5.5	67	58	87	64	154	418	1212	100	114	71	68	2626	1316	208	80	447	146	42	465	777	289	265	853	1931	432	831	1876	187	443	241	425	1991	307	845	499	451	833	90	494	273	761	220	2433	665	353	1613	1240	4509
1177	5.6	77	61	71	72	508	149	933	397	99	64	73	3492	611	117	115	1128	114	101	760	199	733	499	1256	1120	524	746	1767	117	412	551	245	2521	622	450	574	450	235	87	403	256	1057	81	940	484	174	5769	350	4150
1178	5.7	59	433	74	62	378	65	761	607	636	267	52	3413	871	1119	638	1286	107	97	168	730	401	284	2438	1656	326	717	4379	151	438	453	85	3985	454	467	589	469	8049	95	307	503	1117	147	601	232	459	3689	8811	3444
1179	5.8	54	1101	102	92	1113	92	103	170	1472	754	121	710	360	794	576	609	125	1169	149	1426	511	139	4504	1015	321	1088	1485	205	512	605	226	1947	202	702	620	280	905	207	297	196	1328	221	1448	157	276	8099	8005	5619
1180	5.9	67	1140	930	186	1347	67	109	90	1141	453	54	1486	290	911	285	195	467	223	87	813	380	172	2777	1584	368	664	3387	165	643	594	225	2108	325	244	514	369	4646	195	304	281	1243	93	2097	260	213	1081	1329	4494
1181	6	155	128	89	1034	88	57	146	66	577	79	93	752	887	252	328	845	513	192	74	1129	518	224	2818	1451	408	436	3293	124	557	274	320	2379	513	355	534	342	476	95	353	155	478	164	2096	268	406	678	2274	4707
1182	6.1	104	661	96	75	220	69	394	66	1042	76	324	1481	851	92	697	62	933	692	96	1277	564	222	857	1169	387	843	4006	120	451	304	296	5030	415	324	532	639	571	152	272	79	570	260	3620	208	382	933	1130	5309
1183	6.2	73	116	459	81	97	1015	128	191	869	69	1346	1942	822	125	130	67	434	496	595	859	555	300	951	1350	352	671	3237	164	444	367	123	1310	171	758	563	494	439	209	411	278	770	183	3430	421	451	622	1284	2797
1184	6.3	191	179	96	79	67	1845	67	336	408	81	747	1727	903	60	262	82	66	884	88	2063	382	177	943	1432	998	666	5067	151	426	359	393	1045	459	444	302	359	760	210	400	132	645	231	3684	363	255	2997	436	4235
1185	6.4	1424	71	95	61	56	4642	124	109	565	193	1036	918	961	102	90	90	88	2061	83	488	428	139	1723	1259	672	445	1656	236	482	461	257	223	257	695	637	405	519	182	479	396	663	157	1452	195	358	580	1322	5607
1186	6.5	1383	66	75	75	57	4434	63	92	144	56	572	745	1165	61	83	98	95	1861	77	152	1354	208	2309	1893	590	759	2560	182	268	295	134	1557	326	412	435	231	1022	192	378	226	884	86	590	135	292	687	4588	9995
1187	6.6	110	54	145	66	85	5291	74	69	302	52	592	1072	1783	89	160	153	67	1255	79	118	388	210	569	406	617	855	2599	127	321	438	170	831	412	274	245	458	366	212	242	406	1174	237	506	168	361	1087	483	8820
1188	6.7	74	65	254	91	103	1917	180	221	113	42	66	986	1131	153	55	696	168	1292	64	368	412	374	625	699	835	631	3398	298	603	414	212	1541	583	616	2005	569	289	225	276	244	453	94	3680	304	341	1399	459	1653
1189	6.8	62	67	97	117	119	2134	336	86	126	67	288	2289	2246	1331	63	809	103	1068	82	95	480	242	1620	1985	650	992	6541	262	831	372	112	1687	655	645	675	407	310	199	223	471	529	260	1899	226	240	1192	393	3918
1190	6.9	49	75	127	126	90	4862	156	111	376	58	332	767	3299	786	59	620	72	137	389	78	704	182	1948	990	1456	380	4405	177	537	211	136	2557	762	584	426	374	299	218	242	92	1019	308	4494	156	423	1158	672	7502
1191	7	91	131	133	441	73	3967	82	113	139	79	63	1432	1760	188	62	764	60	492	828	88	684	329	1917	588	1056	734	2942	113	713	216	149	2132	337	518	580	434	396	135	283	503	953	75	3447	311	546	899	13734	4703
1192	7.1	68	30	151	1338	73	6130	60	303	124	136	359	2908	761	146	206	663	83	121	342	57	582	404	1904	960	933	891	2655	96	847	181	360	2759	570	758	494	494	279	246	348	110	796	195	4062	354	311	2109	7425	1815
1193	7.2	73	36	120	169	286	2314	283	91	103	235	233	1882	596	97	97	512	86	113	92	80	416	268	569	581	498	979	2835	190	453	381	442	1352	772	348	1924	567	284	221	367	138	452	66	2282	211	271	1599	426	5706
1194	7.3	109	75	110	106	202	3224	529	92	86	880	389	1483	377	88	70	560	71	73	81	685	375	234	1693	1227	145	1013	597	61	404	745	374	1317	980	287	651	523	2489	141	339	238	524	107	3175	204	306	1678	2260	12059
1195	7.4	52	1048	1135	86	98	4697	79	73	119	785	136	1635	202	122	97	292	108	157	58	821	481	143	4428	384	322	614	439	157	419	337	385	3139	754	358	651	406	551	241	267	555	565	108	4149	293	304	2208	630	9050
1196	7.5	64	3508	165	85	99	3122	67	117	120	69	158	1488	221	87	97	567	170	263	63	3061	1404	228	4594	650	151	560	741	245	592	410	313	1769	660	336	413	379	990	172	365	166	668	208	1760	262	458	2166	2431	2675
1197	7.6	51	2825	78	388	70	4312	66	203	138	64	109	2400	1049	60	206	1086	325	126	83	1455	1024	270	449	848	173	556	452	154	661	281	441	2021	948	381	392	314	735	181	315	355	611	354	2544	330	306	728	654	3434
1198	7.7	264	5403	91	99	44	2841	95	191	514	114	130	1311	360	785	70	68	353	294	137	420	2856	178	739	801	190	400	498	212	540	593	302	2243	696	663	541	262	1538	145	287	192	747	227	2167	343	304	875	375	6331
1199	7.8	759	6639	1296	93	37	4617	122	175	395	75	78	2694	1618	795	70	567	66	94	99	346	1290	195	1371	605	368	805	607	239	492	660	124	3124	677	652	356	413	610	163	383	245	1086	92	2753	201	481	608	327	3714
1200	7.9	211	5957	1418	117	67	3485	103	139	124	58	88	3943	3614	88	191	59	85	99	430	1422	1228	248	1858	492	393	1064	527	232	686	1449	206	3682	594	665	266	521	1583	219	395	325	1058	113	743	302	414	731	205	3034
1201	8	66	7201	680	95	65	2580	214	266	121	113	262	4579	2099	66	1235	62	93	98	837	2617	1341	173	903	584	990	718	466	200	771	519	286	3265	473	747	547	572	1382	246	304	167	1416	360	1484	177	413	837	440	4511
1202	8.1	52	7466	109	1306	69	171	91	601	113	70	283	4742	3937	79	787	79	86	126	1376	2833	1246	245	985	521	637	578	630	153	863	304	107	2564	224	356	340	358	1570	232	429	278	739	81	2942	369	343	1230	467	12553
1203	8.2	66	6482	79	2375	71	484	105	756	116	63	562	2209	5680	79	467	58	64	152	668	176	1215	239	2560	752	699	398	411	302	527	400	125	1114	294	488	254	656	925	231	494	205	850	215	1580	202	403	1031	491	10071
1204	8.3	61	6635	85	3077	57	292	85	682	81	85	864	2920	6073	144	79	60	86	230	94	252	1453	154	5724	589	488	311	428	145	568	356	300	2468	626	495	354	626	474	225	354	146	841	129	3709	326	437	1077	501	4445
1205	8.4	60	7274	167	2311	64	668	832	113	87	195	393	2427	6406	53	78	53	74	129	70	446	911	199	2679	282	507	647	519	108	337	390	630	2596	451	707	677	423	412	201	416	89	501	451	3457	194	158	541	457	2888
1206	8.5	77	7408	275	2919	450	1354	1780	122	81	100	345	3117	6152	75	55	63	62	100	297	961	1054	178	1018	562	560	538	357	160	864	412	490	1467	281	689	287	511	201	160	351	393	499	467	1306	132	316	273	507	2762
1207	8.6	118	5994	85	3085	609	4841	554	103	77	74	323	2291	7659	115	78	395	234	88	1289	1241	1091	227	1497	643	487	839	432	229	467	613	213	2673	798	618	372	465	171	131	315	168	259	549	431	392	461	1162	543	3737
1208	8.7	117	7122	1511	1156	88	3949	159	130	106	71	55	1016	7147	401	141	331	68	75	108	1038	902	259	1260	558	794	612	344	279	382	330	168	2340	778	518	346	229	217	223	251	342	647	220	2192	284	261	875	356	8777
1209	8.8	139	6281	2647	1853	101	2886	132	130	295	85	436	505	4449	215	73	79	193	70	90	1210	409	265	1704	500	802	1018	265	102	377	290	112	2034	468	274	272	413	438	170	262	133	398	328	3776	236	370	1387	484	9682
1210	8.9	74	6755	1156	515	82	3809	109	92	907	73	1166	1083	3586	373	76	71	997	52	1019	490	210	154	1372	623	960	421	345	173	497	402	174	2588	276	595	314	462	920	260	282	486	451	302	2943	240	363	5657	436	3354
1211	9	54	4128	388	111	88	4453	100	75	670	82	474	1965	5107	1400	132	70	895	201	1175	126	341	195	2398	357	745	788	478	232	606	595	171	2880	297	406	466	360	1811	206	270	445	366	410	3132	145	348	1608	632	3638
1212	9.1	63	6569	61	112	112	4714	101	78	437	60	315	2002	6253	348	715	91	100	878	437	114	353	213	2635	476	880	674	552	177	593	602	396	3360	677	359	588	414	1263	396	337	244	635	499	3547	229	205	2283	532	3418
1213	9.2	55	6830	84	100	69	4230	124	99	686	70	284	1850	3935	45	677	86	311	435	476	112	212	270	1946	350	525	688	300	281	574	706	205	4430	538	336	530	1122	1241	378	290	186	722	187	1739	204	185	921	373	4238
1214	9.3	39	8759	98	125	69	1231	124	616	285	60	372	1187	4649	62	734	117	1002	2359	910	664	292	167	503	374	564	775	534	230	666	357	157	2143	382	353	333	872	1012	158	332	96	433	555	1993	130	390	284	254	3927
1215	9.4	151	2891	452	97	260	2512	179	432	88	140	251	1081	2271	78	556	80	129	147	107	1530	304	199	414	389	577	789	358	243	569	397	230	640	432	219	334	874	738	220	298	324	690	438	2226	204	306	1767	2291	2449
1216	9.5	92	6695	2637	128	300	2232	156	784	332	238	270	322	2032	362	68	45	127	188	96	1305	290	269	702	514	900	573	292	72	410	369	362	1422	259	230	489	311	419	277	319	244	647	289	4030	215	432	3311	13306	4539
1217	9.6	215	6710	952	61	1005	2998	115	790	85	66	284	2432	1136	912	72	209	700	848	98	1112	363	203	1748	492	738	824	255	262	668	395	353	3415	251	318	486	365	249	190	254	128	638	312	2642	123	450	989	707	8259
1218	9.7	616	6530	94	170	203	1561	101	678	115	71	267	2920	338	255	340	1476	139	1362	83	552	250	207	2829	491	421	907	606	171	578	304	155	3381	759	408	857	387	482	183	263	235	831	411	731	233	267	272	288	6771
1219	9.8	590	6495	104	98	62	1821	188	95	131	66	583	991	1710	1108	447	584	154	693	181	257	366	190	2895	370	339	962	480	251	701	770	200	2765	877	317	702	313	579	166	291	336	1011	389	3979	227	201	660	2526	2297
1220	9.9	69	6298	114	60	56	3295	157	70	106	151	332	2188	1033	412	172	916	71	338	271	120	300	262	967	156	541	570	201	179	541	487	173	2476	466	514	839	328	394	198	293	335	1004	128	2332	281	239	495	817	3348
1221	10	85	4941	236	59	98	3517	93	62	95	253	311	2718	1940	133	73	109	67	94	74	73	373	149	1395	398	530	221	368	122	601	334	210	4308	458	470	404	347	345	265	331	554	1375	52	2659	192	310	1226	1269	3811
1222	10.1	94	5754	462	103	55	2619	84	87	97	81	249	4148	2387	231	52	603	116	144	75	64	255	349	1883	523	137	272	209	136	527	184	103	4181	568	597	444	444	438	134	325	331	1635	84	3678	201	258	606	740	5739
1223	10.2	71	7556	1180	121	68	3885	76	63	87	81	487	2103	780	104	54	1386	199	92	107	87	252	205	1822	462	382	476	602	280	515	195	114	5378	474	443	650	416	605	416	320	208	1275	170	2154	236	367	620	1087	2714
1224	10.3	27	6118	104	97	54	1985	85	60	68	114	43	2145	1132	184	69	419	105	78	110	64	690	253	340	261	771	974	247	122	758	250	347	4986	343	352	634	312	1121	187	334	440	562	104	1687	187	450	7142	825	2868
1225	10.4	66	4160	620	115	56	3072	105	69	91	73	47	407	2480	121	86	246	87	49	299	56	349	201	1049	244	293	609	497	148	710	206	247	3662	261	291	738	325	629	295	196	71	533	102	1646	171	271	9599	4196	5090
1226	10.5	97	4822	1269	105	81	2257	100	79	407	68	48	471	967	98	70	83	30	463	105	560	376	262	1414	566	290	843	276	92	476	247	147	4316	274	321	1127	347	392	236	204	184	663	132	2894	141	347	856	16561	10678
1227	10.6	81	5563	687	389	68	2249	77	79	601	102	10	1492	582	107	63	156	65	117	1147	789	470	223	3352	557	282	926	323	209	737	233	66	2224	325	271	439	312	706	185	279	291	1126	137	2798	220	303	974	1950	4193
1228	10.7	69	4955	124	1196	85	3578	259	61	76	70	62	1441	1364	185	288	977	69	83	1417	87	609	173	4713	530	322	632	527	62	527	246	73	4770	406	331	4306	439	762	184	420	209	671	53	1900	144	339	1164	1059	6441
1229	10.8	70	5414	79	1240	71	4186	89	57	356	61	44	411	4320	969	1107	452	81	80	492	43	387	248	4995	289	556	881	300	224	608	145	220	2602	359	313	660	370	2749	197	306	204	1316	84	3077	219	346	1439	1172	7740
1230	10.9	152	4234	522	1536	65	3667	52	58	90	78	32	744	2500	801	681	453	70	87	954	75	165	127	815	408	243	1031	217	165	495	200	160	3455	386	281	794	323	826	190	317	361	1351	230	3311	115	357	962	853	3600
1231	11	82	5516	1041	110	410	2717	60	78	104	47	35	654	852	139	304	1000	65	58	2520	91	1017	292	2915	466	432	776	407	153	660	313	277	3973	297	262	255	487	666	195	381	508	1219	178	4547	178	379	3856	327	6023
1232	11.1	69	6624	1671	98	111	2340	109	69	89	86	59	208	581	80	195	118	80	80	247	65	409	255	485	364	580	897	304	180	690	427	205	4317	283	234	609	222	1095	217	321	471	1222	205	3579	219	443	2495	980	7885
1233	11.2	72	4698	1625	103	60	789	479	62	83	92	42	402	675	184	77	152	510	285	321	96	363	229	829	368	495	462	501	88	545	240	128	4307	249	405	472	204	868	229	303	137	1052	85	2546	273	248	583	264	7874
1234	11.3	75	3863	1412	97	51	1771	133	76	87	71	90	412	576	200	69	609	79	130	67	52	385	161	2114	197	611	278	284	95	557	378	75	4593	309	276	266	289	938	318	346	244	658	133	1777	355	278	606	2679	2751
1235	11.4	95	3796	246	108	50	866	132	70	66	398	55	1324	4500	79	93	664	372	94	61	88	400	197	3955	411	843	316	393	193	583	212	71	5817	296	320	305	256	714	239	293	173	562	267	2383	130	336	8557	553	2609
1236	11.5	82	2178	139	111	58	1127	81	65	56	189	51	2870	4580	68	71	1686	61	81	321	382	429	346	1012	668	830	318	231	246	489	426	78	4883	257	591	876	339	417	184	292	267	293	59	676	227	314	4291	348	3709
1237	11.6	205	1031	295	83	92	4001	118	73	1084	394	61	2949	2336	107	205	661	62	68	87	598	503	139	748	520	322	489	239	379	552	292	320	3225	369	453	706	396	1082	169	389	228	395	396	2200	204	376	300	439	5124
1238	11.7	79	72	99	73	57	3742	172	42	1748	115	25	3454	2695	79	65	642	594	85	76	3740	587	164	1411	534	464	843	440	905	565	272	318	3562	472	309	553	497	826	246	603	179	377	183	2904	263	252	446	417	4693
1239	11.8	415	98	102	78	55	2979	115	145	819	63	6	6415	1612	63	64	626	544	57	88	2652	913	198	1584	399	736	791	341	1122	657	300	190	3312	252	857	2843	345	750	237	340	137	353	173	380	246	195	555	5079	12612
1240	11.9	540	75	92	132	79	2728	429	153	123	80	30	7294	1107	92	101	808	1555	48	65	1305	1458	219	2364	492	301	597	489	15262	552	312	198	1554	704	326	354	469	629	254	347	201	686	247	2329	330	403	492	1457	3164
1241	12	135	91	264	88	44	2867	104	170	126	55	69	8031	662	76	168	907	1501	67	459	2300	1160	327	1116	413	355	549	145	6536	680	404	172	2336	508	221	614	373	270	407	173	192	1124	77	1061	251	280	460	699	1673
1242	12.1	82	69	449	497	55	3121	95	88	126	51	46	7598	243	118	120	104	1587	80	557	2150	780	268	1979	426	500	1169	374	4271	708	521	355	2138	268	373	589	585	259	244	288	453	911	265	1714	174	411	148	602	4403
1243	12.2	198	350	836	1623	72	1626	112	124	92	96	62	8129	374	79	241	58	475	67	107	444	1071	233	614	181	252	439	223	2745	656	508	143	4141	541	431	486	421	542	215	359	587	913	190	429	294	336	5207	15324	8615
1244	12.3	364	161	103	1525	61	484	109	107	120	63	61	8876	1376	49	684	46	1291	597	82	833	1131	238	1077	179	646	995	458	2476	605	602	82	1961	543	281	609	458	665	584	300	138	1017	100	487	376	351	1523	713	3438
1245	12.4	86	99	437	2306	94	121	63	73	108	56	35	9786	3769	68	1262	702	841	1671	88	1866	780	129	1453	492	266	376	282	1963	734	294	184	2309	762	327	2159	254	377	445	378	208	958	125	1849	345	309	1880	888	1944
1246	12.5	88	226	310	561	86	105	111	69	381	614	30	8668	1703	130	1028	147	90	719	76	2672	319	194	1488	404	269	774	492	1363	495	338	191	1394	584	651	498	309	218	445	369	321	1138	216	669	245	279	656	538	8984
1247	12.6	77	62	97	100	61	95	58	51	1798	891	6	5571	1630	61	89	129	555	677	139	750	1371	151	2046	642	467	438	402	1715	608	334	176	6034	419	559	523	416	197	349	350	369	1349	302	380	178	304	2498	1495	10612
1248	12.7	46	78	89	262	44	445	89	79	1510	49	16	5911	2282	82	91	102	841	1236	95	806	1031	184	3108	499	500	1106	301	1566	596	425	89	2843	551	479	677	255	209	387	264	175	1217	190	535	241	271	893	1968	4763
1249	12.8	59	50	101	98	35	398	284	37	354	78	28	6101	2238	67	54	107	557	282	333	1186	799	204	1931	435	435	497	344	1624	527	220	153	1084	178	654	642	414	2862	503	247	406	971	105	2097	401	304	1296	907	8711
1250	12.9	69	75	125	99	86	666	98	63	117	63	494	4566	3415	100	62	81	684	104	654	572	523	146	670	406	338	488	136	1369	520	525	220	3682	338	798	728	282	923	469	473	348	781	104	669	240	238	3411	981	5500
1251	13	93	74	104	121	79	1763	122	69	140	140	1111	4957	4498	72	252	85	89	73	325	1021	1439	196	847	342	332	936	283	2416	685	1014	117	3533	328	291	291	495	1094	476	395	250	538	183	431	78	339	4066	1498	1894
1252	13.1	60	66	111	108	72	2080	72	248	110	60	310	5464	4519	236	1029	80	95	504	1452	653	1129	174	1739	206	436	829	236	1721	522	563	81	4299	394	556	381	200	471	1178	385	245	1368	142	1640	192	241	3734	7965	2802
1253	13.2	191	81	77	82	84	2664	86	71	122	98	258	6915	5567	105	148	80	806	105	974	897	745	177	1997	254	963	806	98	1906	738	275	122	2503	330	703	283	268	765	2758	317	264	1244	191	1377	271	299	27830	1361	7287
1254	13.3	57	750	1128	74	155	1190	1193	100	92	97	123	7168	3116	93	69	64	315	98	92	881	553	365	2795	246	569	481	367	2029	485	441	98	2956	796	536	596	203	1177	1227	313	382	1070	121	3042	219	386	1885	1159	10089
1255	13.4	49	700	586	100	741	381	1626	93	94	40	97	5747	2214	116	44	1076	826	58	72	927	594	424	955	329	287	514	313	1373	672	585	81	3986	656	456	238	306	1319	806	267	56	1292	357	2626	281	333	3644	781	4568
1256	13.5	43	90	1114	686	818	506	1372	89	75	73	132	7161	1156	75	62	1732	77	72	81	252	744	227	824	613	405	949	154	1671	687	516	303	3751	367	620	175	513	542	1170	424	234	973	132	1799	182	352	1522	244	3924
1257	13.6	64	86	73	1743	905	1939	262	56	382	557	147	8252	792	52	68	1610	87	33	81	254	691	160	1064	547	767	815	165	1709	714	475	214	4696	396	452	203	452	1293	4501	382	207	922	298	1211	203	323	1704	174	5862
1258	13.7	45	62	84	223	696	786	135	465	140	1196	133	6825	549	47	70	1841	114	87	64	144	523	282	1020	548	579	392	267	1299	759	508	129	3341	271	470	358	422	462	4810	250	424	763	220	721	247	362	1069	354	8602
1259	13.8	33	70	139	97	66	1243	190	324	485	186	125	7814	1219	74	48	607	87	67	368	55	1034	773	1112	410	541	110	366	1422	640	579	302	3031	329	790	359	300	1946	3157	347	224	1071	143	2719	264	540	1391	507	7981
1260	13.9	31	193	79	96	67	478	388	633	127	80	119	7109	1791	95	76	346	94	404	89	66	1822	345	2454	326	693	146	230	1537	477	449	216	4546	537	622	470	378	1362	4046	396	344	1166	105	3376	176	270	683	477	3917
1261	14	63	1014	100	62	85	1716	315	463	110	57	89	7135	1531	141	142	106	82	85	86	107	673	204	1096	405	630	219	225	1428	521	331	153	2556	365	238	356	274	1481	3022	323	354	688	67	3127	110	307	691	3089	2127
1262	14.1	49	1167	123	93	96	2256	324	259	93	79	79	7958	649	69	200	130	368	128	86	96	632	195	1480	355	671	88	352	1798	715	966	232	3300	365	718	216	418	1719	3402	260	290	488	88	3511	145	357	418	371	4190
1263	14.2	29	1178	84	132	60	1362	364	96	83	73	90	7271	1490	999	695	83	117	83	70	56	619	266	669	403	1121	154	304	1061	737	616	197	3246	389	824	544	360	1143	3106	261	106	401	107	1533	246	296	297	603	1410
1264	14.3	46	914	79	68	73	126	297	74	103	61	106	6679	1336	557	395	70	72	255	181	76	1188	126	2577	413	359	248	204	1448	535	577	228	2204	475	610	375	397	474	1257	323	96	718	137	1787	201	480	7013	465	941
1265	14.4	45	803	58	113	88	106	991	78	101	60	96	5620	3305	571	114	84	64	486	1065	404	604	208	3918	441	294	74	439	2211	714	495	284	2600	194	151	424	385	1675	5071	348	289	657	299	1542	318	212	1810	573	4275
1266	14.5	33	1130	166	318	162	108	1133	68	90	101	89	4233	3314	279	87	410	79	1783	1036	1112	681	136	987	389	342	119	324	2740	455	674	203	1610	472	225	399	229	217	2863	419	392	586	177	1675	280	259	794	394	5293
1267	14.6	149	544	200	1171	936	111	606	79	334	113	88	3949	2010	1121	70	221	301	1631	248	227	627	247	944	304	362	155	267	1729	564	527	191	4483	560	255	335	324	4475	3066	312	242	401	268	697	109	367	620	490	6025
1268	14.7	251	92	104	1000	741	114	200	70	88	72	85	5269	2491	99	76	82	93	985	995	86	372	255	996	500	678	189	281	2005	492	709	139	2433	343	173	407	270	1408	5037	288	182	444	58	552	324	479	542	347	4932
1269	14.8	731	118	81	475	940	140	191	80	101	58	128	4383	1310	97	110	76	70	678	270	77	327	200	2047	473	667	68	230	1309	903	502	131	1808	334	340	485	259	858	1121	310	130	416	205	710	147	237	4736	396	10441
1270	14.9	102	101	88	95	140	151	139	79	93	84	907	3064	833	54	95	82	176	1261	234	57	433	168	2488	481	512	78	214	2168	2306	753	101	3582	379	442	504	220	827	461	182	166	370	406	2695	209	263	3360	285	8695
1271	15	77	101	89	100	61	115	162	90	75	50	192	2147	1823	67	76	569	79	922	171	82	310	176	681	352	384	140	226	1553	2122	372	176	2692	234	409	436	265	1133	2285	318	395	847	338	951	108	356	739	566	3519
1272	15.1	55	124	457	112	90	83	104	83	118	66	787	1727	2658	135	91	589	89	498	508	85	559	204	855	363	888	259	86	1194	4116	246	157	3486	322	285	430	560	538	652	341	123	589	161	336	320	256	949	496	1595
1273	15.2	51	100	57	75	66	146	140	86	251	46	1238	2848	4787	719	85	716	86	81	108	62	177	236	704	476	266	209	380	2083	7546	435	229	4822	310	612	648	575	629	250	269	179	431	199	472	263	294	5232	5116	2605
1274	15.3	70	132	110	75	58	103	111	53	1157	69	772	2112	5365	246	90	116	669	132	96	32	401	165	828	335	419	448	248	2658	7953	548	400	2231	190	629	293	158	670	358	206	199	443	50	566	162	210	1257	760	6251
1275	15.4	55	121	443	100	65	133	143	64	1122	57	566	1301	5802	118	66	74	1078	496	235	75	335	156	1083	573	605	281	306	1811	7582	405	229	3787	273	407	393	206	1469	307	319	236	264	344	2041	230	324	498	516	7860
1276	15.5	65	107	768	138	75	633	99	113	958	69	301	507	5016	83	67	86	307	66	458	47	406	163	1893	522	716	289	477	2335	5879	430	256	2603	256	303	398	414	684	255	346	153	671	273	2441	342	402	971	952	5806
1277	15.6	43	145	247	962	77	981	36	87	102	49	228	905	7260	40	84	105	124	89	108	59	367	276	1919	275	1043	174	142	1848	2174	217	327	2859	299	230	400	246	1374	434	283	278	931	119	682	230	170	2838	244	2812
1278	15.7	69	188	612	104	83	1024	70	116	161	207	195	1183	7411	140	102	113	63	456	99	64	249	311	1323	416	418	123	360	1521	697	325	244	3980	446	245	552	145	3246	387	253	226	1507	156	368	235	210	1950	511	5750
1279	15.8	72	392	233	91	96	1737	91	109	262	162	158	1066	5879	1389	92	212	85	468	98	72	387	136	599	178	481	133	327	1582	671	234	237	5145	364	345	421	184	512	383	269	160	1322	154	765	189	364	10575	2781	12284
1280	15.9	64	935	51	97	78	2984	142	85	105	526	191	3238	3527	373	63	450	81	1170	47	361	307	215	1542	460	608	286	252	1832	657	354	208	4002	432	354	406	229	2941	502	269	218	1270	123	940	192	229	1932	1065	12920
1281	16	777	303	65	76	467	3480	103	204	106	744	169	2680	3804	127	83	976	86	305	425	1267	205	189	1016	323	769	161	103	2211	542	256	177	3761	531	667	361	364	980	359	265	238	1173	165	1538	151	354	313	290	9363
1282	16.1	173	128	76	111	281	3010	106	254	132	271	178	1504	1510	144	105	209	213	150	89	1192	497	159	1649	105	866	160	345	1365	520	184	256	5057	391	585	629	197	309	195	285	620	1157	125	3556	245	329	1752	560	5634
1283	16.2	582	130	49	95	309	3380	38	94	365	73	120	2181	817	140	89	101	1278	129	88	426	647	326	1011	250	737	169	287	2172	594	287	180	4686	309	319	550	612	222	259	280	135	1147	210	2291	179	344	5470	1275	2738
1284	16.3	410	114	89	100	93	2941	201	77	75	52	167	2537	622	89	203	92	82	121	85	59	1087	193	519	113	669	101	368	2377	506	304	134	5640	351	208	512	578	264	235	351	208	1168	46	1890	248	246	291	1326	3964
1285	16.4	100	58	79	91	68	2440	341	327	100	54	565	3525	310	132	511	106	152	93	97	41	1475	163	828	388	959	141	421	1042	441	346	296	4716	377	263	426	441	13431	372	292	183	1002	174	2356	204	351	2488	1003	7876
1286	16.5	63	80	58	1617	84	2718	156	89	85	49	745	2335	202	103	648	138	1080	76	209	59	1083	225	3084	77	357	213	307	2381	414	122	379	2610	406	301	184	233	773	189	258	331	933	419	2380	185	329	1858	638	5629
1287	16.6	31	93	60	916	79	3348	214	128	98	71	291	2039	331	72	1342	1291	240	145	178	55	945	200	1287	312	494	269	192	2570	506	248	153	2574	412	225	309	433	2284	222	249	288	1008	297	4047	255	350	3020	526	713
1288	16.7	74	128	78	1595	65	2842	662	106	93	80	283	3369	1701	98	127	908	86	110	94	76	490	177	700	220	490	243	263	1965	651	240	131	7616	510	256	636	450	917	150	376	134	1107	79	2897	407	229	429	619	1225
1289	16.8	52	79	591	1284	324	4077	1443	88	101	56	258	2705	1177	286	849	90	75	306	62	74	1065	281	904	249	571	490	434	2001	691	226	177	4160	276	396	672	324	2447	176	259	259	1062	209	784	282	299	920	234	4623
1290	16.9	150	71	1429	4612	70	1097	855	86	90	51	136	1472	1076	69	959	80	81	132	100	250	960	126	634	456	696	669	335	754	703	339	168	5818	367	328	540	317	495	233	242	284	950	385	649	178	269	4220	383	5197
1291	17	90	129	93	6225	70	1115	430	79	80	60	71	2116	4051	54	128	40	92	131	579	62	890	208	1919	409	1017	691	228	1953	435	445	281	3513	429	320	506	273	946	126	505	73	1045	176	712	343	375	507	339	1584
1292	17.1	55	113	71	8431	66	2157	101	61	98	42	79	1561	2000	68	370	55	53	328	92	41	1216	224	1401	183	239	681	311	1726	505	377	295	3500	612	384	684	200	13662	315	483	321	666	86	1543	293	314	864	401	3319
1293	17.2	41	97	83	18166	63	3244	85	79	99	41	67	2679	1337	274	842	158	63	130	105	75	847	238	841	232	779	629	319	2417	575	317	268	4132	468	321	573	315	963	263	312	230	561	75	3284	237	297	1151	540	6298
1294	17.3	71	882	88	5652	75	1355	75	62	126	220	51	1934	1114	1040	172	64	45	151	95	65	801	248	1694	218	745	431	175	1999	972	221	200	4071	534	390	430	282	5254	337	279	157	699	125	1370	401	412	1412	206	5012
1295	17.4	52	826	87	786	92	934	120	50	87	70	49	1779	1125	81	66	160	180	102	96	155	731	236	1902	162	627	983	242	1785	640	244	338	4766	467	275	670	207	322	158	352	169	1193	88	511	296	319	1526	237	2039
1296	17.5	23	86	185	4660	75	568	94	63	74	59	23	3007	285	6653	1098	30	97	81	328	78	457	286	1775	305	417	616	203	2027	698	287	182	2180	566	315	3210	306	491	171	416	178	1080	54	1744	272	293	895	370	5211
1297	17.6	69	84	517	5201	410	433	649	235	73	74	49	1571	1035	19779	214	52	87	103	177	71	967	230	831	535	325	981	276	1773	656	326	401	4342	353	452	1034	409	3009	160	508	131	1234	44	3412	215	307	1685	348	6796
1298	17.7	69	79	1108	12736	328	170	440	241	82	451	70	1406	214	12885	76	80	87	82	82	104	558	205	2612	685	319	841	229	1935	596	479	285	5867	345	221	785	444	2070	204	239	187	1251	92	1931	550	414	1007	656	3619
1299	17.8	72	63	94	8025	389	92	103	656	365	104	285	2041	682	5880	98	1075	69	386	40	1137	1408	211	2703	1000	153	513	294	2504	661	402	186	3787	568	283	594	363	1458	186	318	357	1053	264	4045	384	387	321	316	3252
1300	17.9	80	154	70	20776	406	474	63	93	171	59	985	3411	742	14465	144	450	24	503	93	1265	828	232	1528	2353	379	747	190	1976	714	538	288	3282	466	439	685	390	890	236	302	178	1121	159	2560	900	351	232	342	1984
1301	18	68	131	55	9940	69	1621	89	81	593	66	625	1906	316	16728	72	1875	120	94	82	306	839	170	1455	1059	452	656	254	2721	701	363	217	4388	450	435	1216	270	671	278	307	72	681	127	2321	215	461	1692	1032	7588
1302	18.1	55	241	89	1769	106	1446	75	69	1814	116	115	2523	99	15926	72	115	155	84	60	200	513	192	801	4721	285	576	231	2416	475	334	351	329	543	392	849	451	600	372	337	174	475	119	713	219	278	546	790	12220
1303	18.2	107	118	67	122	89	1855	79	46	509	163	129	1791	284	17039	92	98	230	139	78	166	819	222	966	3278	336	544	259	3308	433	283	156	1438	598	617	706	524	490	203	393	641	783	128	493	239	296	5072	12593	10684
1304	18.3	60	137	96	118	60	2845	69	85	116	89	136	1580	659	17086	89	79	134	109	88	773	1485	182	614	2305	359	788	432	1456	729	242	73	1625	404	727	649	234	180	207	397	260	351	227	335	266	299	1309	15185	6184
1305	18.4	56	97	105	85	73	2817	75	29	338	116	88	2199	1859	9607	63	68	207	88	105	1171	1132	220	726	3725	303	984	289	2065	555	225	228	576	326	712	821	176	3785	134	291	277	418	73	2946	317	350	1154	1612	2753
1306	18.5	62	80	56	225	97	3382	91	89	110	56	106	3180	1848	1981	70	99	83	66	115	220	2295	183	2742	2555	343	793	209	1381	559	160	171	2385	303	452	426	279	4465	134	329	474	599	127	660	187	204	1697	220	3620
1307	18.6	75	85	79	661	67	1543	326	61	121	67	138	2941	824	2015	78	247	100	194	154	113	1262	240	3448	1219	897	313	263	2543	556	171	138	3010	263	428	1385	179	1193	112	273	156	579	494	3137	226	360	1508	1312	9180
1308	18.7	106	169	74	657	65	2311	640	40	230	74	145	1715	690	1949	115	459	43	1810	98	170	555	182	1659	1936	753	3553	187	1836	628	276	425	2977	215	652	750	249	613	128	461	311	529	235	2785	442	423	477	2269	11795
1309	18.8	70	742	297	97	66	1707	699	22	339	50	106	1583	275	1018	127	1009	62	1930	71	132	533	117	1994	1116	799	1239	171	985	806	443	186	4193	467	254	140	321	310	182	325	247	375	414	1799	296	471	412	7287	10826
1310	18.9	88	1406	93	107	77	1311	794	43	83	72	288	909	2520	192	116	648	35	902	530	191	826	192	661	1343	541	273	304	1930	681	332	213	4690	534	356	276	396	155	244	320	207	646	350	3649	319	279	557	656	2155
1311	19	76	667	81	79	74	813	106	10	84	60	968	2498	5531	164	53	169	60	1004	636	83	1134	196	1494	855	436	708	369	3263	549	349	329	4034	295	707	572	226	750	374	258	125	1060	109	2990	195	257	653	2513	2833
1312	19.1	89	130	66	97	107	1415	125	43	86	70	288	1658	7124	116	75	65	39	94	891	76	590	227	1131	1244	375	652	331	1587	476	363	137	5465	338	535	411	253	934	757	373	189	849	191	2792	297	388	284	1943	606
1313	19.2	79	90	503	91	228	203	84	90	87	59	375	1906	6996	125	130	78	76	71	668	76	410	226	1880	726	508	16231	339	1060	721	507	188	5267	318	294	1388	249	603	695	325	167	746	225	2440	279	395	683	875	519
1314	19.3	275	64	502	80	223	150	98	90	348	39	431	1964	8023	78	56	96	73	105	92	76	1079	180	909	791	671	21747	275	2430	757	527	271	3542	259	439	331	233	247	651	385	192	969	92	912	194	207	289	386	1913
1315	19.4	69	75	248	83	87	119	138	52	89	58	359	1141	6558	68	78	206	40	504	74	67	1196	183	1778	1153	140	15184	297	1592	645	611	400	2702	394	348	496	381	2729	651	339	121	1443	153	1839	490	352	1477	3655	9211
1316	19.5	56	40	105	113	82	115	83	113	331	650	82	1011	6224	320	62	575	114	102	293	57	438	166	3327	1410	341	15789	550	1883	640	504	205	2615	442	522	702	210	1071	1079	284	191	1306	165	1234	207	309	3121	7153	9325
1317	19.6	65	77	116	112	89	102	75	102	493	2404	107	1708	8210	95	69	104	98	463	1333	179	564	252	560	951	383	8896	288	1339	901	573	429	4198	712	585	196	290	791	4603	253	201	1586	174	3004	231	336	1517	728	10506
1318	19.7	337	100	85	606	171	84	96	91	163	131	62	3701	8094	91	86	78	82	118	315	1006	383	158	732	1441	535	10514	562	1676	772	830	213	3420	278	481	639	215	965	12348	238	153	930	76	1148	170	335	449	261	9652
1319	19.8	670	285	67	167	102	417	116	279	107	79	107	1686	7974	86	127	92	43	113	117	1114	1455	135	1871	714	368	8775	143	1189	590	646	185	3863	581	241	1157	308	711	8498	265	603	936	308	2992	467	318	1288	331	3234
1320	19.9	4241	2034	180	104	67	104	114	124	99	75	82	2287	4194	1717	63	116	63	113	91	78	2031	112	3988	377	339	6054	328	1385	602	576	301	3472	474	415	469	318	568	1310	289	387	1174	87	614	339	263	1691	300	3183
1321	20	278	1285	79	78	73	513	91	184	102	49	95	2198	4645	1400	78	101	153	103	450	99	1081	276	2990	1106	445	6626	161	2303	598	548	231	3004	461	392	391	163	2218	1384	319	186	1319	250	336	302	249	1390	444	3057
1322	20.1	527	215	70	86	59	1869	433	100	82	74	183	1814	2335	1982	60	64	103	76	114	74	496	237	2284	840	376	7407	152	1009	633	594	348	2694	635	172	251	393	14542	924	339	396	1399	202	1012	84	213	465	424	6609
1323	20.2	1175	222	540	92	74	2602	82	77	98	104	142	2152	711	1843	104	55	934	409	100	73	512	247	1182	1067	722	7845	277	1152	707	369	241	2521	503	463	751	327	1121	894	322	166	1334	104	2565	281	426	660	422	12561
1324	20.3	97	234	524	130	73	1975	155	98	288	491	100	1380	562	2477	49	99	1036	129	85	31	1216	350	868	899	517	6068	439	329	698	266	100	3077	290	217	862	391	385	752	350	147	1350	61	1961	179	237	3809	311	9713
1325	20.4	59	132	148	460	63	977	126	112	110	76	76	713	977	7543	48	337	840	111	338	65	610	257	1021	1535	280	6775	276	767	703	474	107	3292	256	446	429	268	1414	524	398	129	1302	207	1859	150	309	421	342	655
1326	20.5	85	175	86	1074	80	1717	81	89	121	70	55	950	159	11659	158	131	505	119	105	45	305	567	1417	1094	513	4974	231	184	701	526	402	2986	424	393	754	250	1937	208	299	326	1008	259	2727	383	278	886	337	4029
1327	20.6	88	130	116	578	78	160	137	124	198	60	256	718	747	12460	135	110	56	104	108	39	389	244	5560	981	271	5935	161	432	509	509	209	3660	441	567	847	277	1930	238	255	289	816	193	1420	272	304	3256	239	6509
1328	20.7	91	213	92	532	60	98	96	38	121	64	63	430	1037	14411	100	218	88	87	97	90	411	217	1482	871	301	6467	312	206	753	773	308	852	492	414	1161	252	284	432	341	182	931	434	2340	189	288	398	251	4356
1329	20.8	100	175	107	408	593	106	51	58	689	45	51	1390	528	12666	80	168	68	124	199	69	449	166	908	448	374	4429	298	468	524	500	155	3994	296	384	907	285	3961	338	383	173	674	264	3764	183	349	498	655	603
1330	20.9	73	221	162	49	176	71	55	94	519	119	66	1060	2750	9876	71	78	91	417	1286	898	222	189	1022	210	418	4164	221	200	623	561	213	2983	419	526	1210	253	679	775	241	178	567	428	5038	192	186	2093	564	2561
1331	21	102	70	79	85	105	75	82	149	96	330	52	1616	1044	932	66	62	150	634	1119	265	258	469	1434	255	258	4662	286	340	711	508	106	2340	691	406	148	348	1418	1108	290	279	391	344	1955	88	349	380	506	6002
1332	21.1	80	76	71	95	61	86	79	80	95	739	56	2017	366	410	58	81	100	88	735	105	190	108	4416	144	292	6321	163	369	563	698	269	4383	520	516	522	353	1243	1918	268	196	460	80	1284	233	435	511	12688	11536
1333	21.2	96	66	99	62	60	46	88	56	379	1278	81	3036	760	318	49	362	102	98	228	70	207	285	1835	383	422	4958	261	298	596	581	245	6453	601	512	419	637	1279	912	342	155	1160	220	1030	295	424	1619	17197	4691
1334	21.3	77	88	1203	96	64	63	358	89	1008	1404	46	4664	1187	139	86	266	92	77	104	80	254	134	555	265	406	1114	257	484	553	358	246	1706	444	538	724	252	1187	2397	389	214	654	200	254	208	329	871	14678	2189
1335	21.4	93	90	169	80	66	145	387	63	325	576	76	3554	792	103	178	1550	58	83	100	69	475	123	955	296	341	1568	213	356	604	298	337	5229	522	403	363	447	522	1172	334	156	390	97	486	166	264	2015	7050	4549
1336	21.5	89	105	60	93	62	444	429	65	109	957	44	2498	4278	82	1015	282	808	83	89	88	192	202	2697	283	329	2017	240	514	630	625	419	5605	560	346	408	300	274	922	339	459	287	216	504	294	468	689	1978	6992
1337	21.6	104	87	69	107	319	648	180	225	86	432	55	4148	7126	79	544	46	84	330	86	57	233	201	413	292	353	1116	232	501	555	251	299	6877	351	547	286	276	572	456	303	158	216	135	3663	164	278	813	1406	3203
1338	21.7	97	55	60	1017	132	703	517	748	88	697	74	6356	3908	84	794	109	73	1553	86	113	453	191	543	298	406	1176	105	576	811	400	301	3497	355	674	260	223	444	307	360	389	478	143	3536	309	194	370	661	1536
1339	21.8	65	69	66	875	80	1056	317	585	92	74	566	9365	5619	61	83	289	78	1322	138	385	461	582	807	170	396	1767	216	410	493	758	120	5007	363	359	466	279	402	307	329	238	501	95	1488	225	377	430	1658	5360
1340	21.9	320	107	90	89	104	2423	81	117	101	251	791	10623	6061	407	72	147	67	222	96	116	224	248	1119	361	270	2269	165	280	797	480	259	1665	369	125	357	414	3510	469	237	132	327	249	1041	158	427	355	693	9569
1341	22	321	771	117	93	87	1964	100	83	98	71	354	12261	5277	1010	61	89	308	168	87	779	1113	129	1633	179	459	1337	209	461	1254	1060	151	6438	323	377	404	343	907	273	223	399	341	194	1991	207	361	375	496	14933
1342	22.1	292	2107	54	91	43	2287	109	258	117	127	369	12626	4240	305	66	94	382	135	86	166	1215	126	2468	107	352	1482	174	387	434	290	192	4662	545	480	391	356	942	363	279	259	395	125	2988	329	300	305	339	3670
1343	22.2	249	134	76	80	42	2737	163	110	93	81	556	13119	5870	113	105	71	707	134	86	67	1287	163	1259	60	713	1137	95	650	622	341	266	3864	731	383	442	429	885	1008	356	623	480	434	1376	219	284	706	239	1964
1344	22.3	91	83	51	101	68	1528	118	114	328	88	60	10923	3848	100	47	98	1197	126	52	99	498	256	1900	321	334	878	299	269	585	561	141	5061	627	489	365	137	756	180	330	521	481	52	2797	242	353	15099	265	8723
1345	22.4	68	119	57	109	98	608	120	782	102	69	104	12759	4285	108	314	73	84	85	344	58	805	180	989	261	373	910	235	312	646	481	239	3092	338	498	358	514	545	260	243	300	569	401	2281	138	365	2893	1143	11499
1346	22.5	86	135	730	895	83	151	100	215	81	54	94	13512	4185	114	1869	228	78	139	79	92	589	132	846	463	323	706	218	525	1332	508	367	4296	488	369	541	233	793	117	255	121	479	108	687	168	340	1232	1220	4584
1347	22.6	61	135	1117	1513	804	143	113	76	118	71	59	7270	3984	78	1110	753	76	204	106	93	668	158	2944	152	695	480	130	398	815	446	381	3931	502	281	426	327	370	202	240	204	467	380	1388	206	389	907	724	4122
1348	22.7	72	763	314	126	1646	117	96	87	126	66	52	6042	2280	85	70	1006	55	775	131	91	950	235	1196	126	407	378	170	244	645	950	327	5540	531	428	342	296	277	234	281	183	359	292	1661	166	308	2575	938	16354
1349	22.8	72	96	368	105	540	90	122	91	119	65	42	10343	1950	87	130	1094	448	644	775	44	471	145	1554	224	526	692	358	432	497	409	500	3390	440	414	426	263	476	200	269	154	399	214	1290	204	147	651	505	11314
1350	22.9	61	58	64	95	83	111	187	145	84	55	22	10402	1597	71	76	474	84	1067	1162	101	424	159	1069	312	621	682	249	325	548	461	308	3373	477	400	203	227	507	174	305	98	393	181	1307	199	283	184	343	8736
1351	23	84	174	65	77	72	91	125	121	90	47	63	9022	334	80	152	140	109	1464	107	1243	783	305	3006	64	393	526	251	233	550	399	425	2202	278	396	184	307	574	141	288	120	538	92	2635	237	314	1728	282	9186
1352	23.1	84	243	139	112	81	85	113	245	123	71	41	5676	620	83	71	129	119	1057	93	640	661	310	713	361	284	509	146	579	729	413	261	3372	449	335	230	206	514	172	243	101	481	63	3157	180	307	2004	499	3814
1353	23.2	79	366	326	554	79	129	96	479	119	64	47	2060	790	936	75	310	77	616	43	1107	248	181	682	451	274	514	123	381	593	662	204	3778	212	502	210	212	307	216	312	184	284	255	2939	293	245	593	453	5345
1354	23.3	53	218	484	847	68	92	191	564	109	57	66	2010	1165	1635	105	83	105	106	82	2547	1561	172	1362	116	384	2881	512	239	689	905	108	5017	225	252	292	436	812	488	340	165	479	73	2382	255	349	169	466	3880
1355	23.4	66	232	90	217	95	74	430	73	101	59	88	2012	3624	139	103	91	81	169	120	5134	978	277	2515	415	302	10755	204	206	879	478	162	2768	242	372	349	465	477	694	243	264	637	137	2272	375	309	803	4894	7319
1356	23.5	188	103	91	86	101	101	1821	84	356	527	40	1332	6165	77	69	96	69	481	91	7463	1042	200	286	269	378	6065	197	705	472	626	192	2620	259	402	243	302	583	1203	286	287	462	213	3089	190	489	1490	667	12790
1357	23.6	167	70	82	652	71	81	1434	71	106	428	24	1975	3561	74	28	89	79	131	83	7996	1415	196	732	227	547	859	240	403	607	474	432	4366	175	541	389	271	1068	1038	264	452	612	116	3182	458	197	2229	1839	12288
1358	23.7	85	77	80	1041	855	82	602	75	124	708	29	1918	2579	132	49	58	566	97	107	11632	1140	227	796	154	207	850	536	167	1201	637	180	2565	118	520	192	231	956	4316	231	379	651	61	4042	259	240	923	2278	4778
1359	23.8	100	61	210	115	124	57	111	104	128	428	32	3506	1455	77	54	148	72	66	68	11679	503	323	1705	201	300	619	402	163	609	588	223	5443	269	475	469	400	753	2230	278	180	672	253	3087	248	332	855	11624	2288
1360	23.9	116	1248	84	75	93	599	120	75	432	89	23	2222	3040	100	67	94	226	78	141	11946	386	186	1642	240	403	1367	397	381	1750	541	97	2947	179	196	335	372	657	1774	270	422	1103	104	2239	208	318	477	3070	1260
1361	24	91	173	335	81	71	1870	95	59	897	206	23	2929	4668	73	490	589	306	104	93	13398	500	191	849	231	304	474	390	480	799	745	117	5341	271	194	266	129	985	861	268	134	941	150	826	319	199	2905	1818	474
1362	0.1	138	405	2358	487	83	1338	81	72	925	111	37	1661	5596	54	746	1503	1125	95	80	3838	528	198	1056	458	282	1002	383	318	593	598	252	3728	210	79	95	446	408	2353	242	125	1025	62	949	280	395	18333	449	2144
1363	0.2	116	129	12739	89	83	3081	81	61	927	97	26	2404	3487	140	202	4606	2207	106	414	3083	1735	186	1661	148	268	898	216	266	696	433	246	5165	345	411	140	377	697	1035	329	158	805	116	1637	248	286	3592	1816	9305
1364	0.3	116	156	16842	90	39	1288	83	63	926	50	34	2784	4837	220	61	5981	9489	91	920	3072	726	142	1943	378	579	893	236	365	546	1000	189	2912	353	395	153	179	237	994	241	194	1255	288	1973	243	310	1102	404	14201
1365	0.4	126	109	15728	87	68	647	76	132	339	151	37	1785	5679	481	48	7962	16877	122	2602	2751	610	219	765	265	604	743	291	182	936	417	233	3288	260	136	142	211	419	863	162	257	1198	168	1247	266	358	663	2055	15185
1366	0.5	115	97	14454	492	53	1172	106	225	403	85	27	1166	6590	1201	31	6254	13547	324	2027	341	535	149	512	123	1101	403	255	422	762	542	112	1956	392	219	316	229	432	838	493	103	1339	242	2969	146	401	1326	352	10245
1367	0.6	269	78	12077	88	65	204	520	149	306	79	27	1320	3270	157	66	9624	16787	166	8259	319	1326	190	1600	247	675	628	209	450	532	742	415	3897	532	301	195	274	464	2826	373	96	1127	217	502	257	346	308	608	4420
1368	0.7	72	92	1308	120	80	741	166	128	216	62	37	677	5168	115	84	12295	16453	105	20720	255	1314	236	1224	235	252	927	293	242	523	666	165	6293	462	425	200	234	500	1050	313	188	880	171	297	303	298	260	544	2149
1369	0.8	281	76	1376	341	68	227	169	107	234	99	580	1267	5009	95	64	13899	14221	184	18611	278	1163	129	1309	245	469	743	120	322	568	473	219	4680	442	351	276	274	493	2276	330	398	911	206	1075	311	488	261	1342	945
1370	0.9	1337	60	9016	1472	46	111	172	330	466	58	117	2639	1399	115	370	11865	902	143	18631	1499	679	182	609	293	978	647	333	323	624	205	515	4574	266	364	393	273	479	399	318	237	718	85	1175	109	246	695	433	4889
1371	1	846	768	855	3623	81	106	167	137	137	47	110	1421	3498	265	274	4242	745	1181	18492	376	1079	213	2178	361	935	854	129	398	752	138	296	4006	453	182	130	254	490	279	261	178	738	180	792	195	263	4071	1002	14733
1372	1.1	464	231	1100	4957	155	78	87	104	144	54	163	1199	5405	270	575	770	653	6719	17203	122	866	180	3363	248	1313	645	207	452	661	211	169	5600	452	417	152	308	409	428	372	268	1007	124	954	328	444	2534	1088	16873
1373	1.2	49	83	2511	7733	81	99	83	106	167	77	481	3255	5112	144	968	940	1086	12086	17928	63	346	214	1282	89	1123	578	192	458	736	494	138	8915	608	564	493	433	485	1020	214	93	537	467	771	244	290	1267	507	13829
1374	1.3	65	132	357	9366	75	90	131	107	251	40	415	1285	8767	1009	2189	121	381	18002	16678	61	475	196	472	229	769	381	206	590	802	283	296	1678	487	140	598	431	378	1109	228	257	333	355	1586	188	240	1213	2159	8693
1375	1.4	115	165	170	12706	74	98	692	104	117	61	443	798	8568	88	5535	95	128	16306	14294	82	578	234	624	263	642	548	205	348	733	304	214	382	270	393	464	467	908	822	399	256	491	137	2404	220	337	1069	9557	9772
1376	1.5	303	85	274	13052	191	83	161	124	107	73	330	1971	7421	71	8341	376	242	17421	16980	69	335	268	836	206	1041	607	215	521	669	344	198	442	333	458	740	508	381	773	386	461	547	97	1828	294	343	900	2380	5053
1377	1.6	96	62	384	19049	991	159	92	73	103	61	607	2087	4300	74	14086	90	377	18333	15766	637	409	240	2833	207	641	818	234	421	1190	242	446	1552	437	412	620	369	648	880	431	218	814	120	1641	187	328	146	1643	2207
1378	1.7	378	43	118	17857	71	623	86	104	113	56	65	1767	2615	70	15264	256	327	17667	15069	1995	1177	157	2152	295	606	1057	205	465	670	262	228	2913	518	435	874	273	708	1281	351	363	760	137	2430	163	427	2776	1455	4805
1379	1.8	147	626	130	17816	250	1798	124	72	136	46	73	1278	2225	81	15790	386	324	14996	6689	1069	865	205	1789	213	696	773	176	308	665	167	330	2373	378	458	425	247	455	468	480	190	517	231	2376	109	286	3484	850	7792
1380	1.9	75	812	105	16985	69	1269	182	76	119	75	176	2138	3657	102	17059	493	118	15598	871	834	1035	180	2419	261	334	470	341	433	527	298	446	2991	225	384	358	267	531	525	382	133	463	185	1655	286	105	285	2545	7807
1381	2	70	134	843	9153	83	1805	120	67	121	78	71	2880	442	78	18461	208	157	12975	505	532	1112	193	295	71	249	555	258	435	803	463	539	3533	655	475	508	273	508	224	325	138	574	93	2407	362	228	174	484	13816
1382	2.1	50	135	506	316	63	750	598	49	228	593	77	854	2004	181	9702	411	148	2320	125	369	939	259	619	212	363	468	181	364	859	270	224	3326	375	227	409	265	549	202	510	240	631	93	2736	290	187	156	1255	9826
1383	2.2	58	118	96	576	94	2663	1271	75	131	488	104	421	1918	76	12951	1385	125	1041	131	131	334	153	1768	416	274	1079	251	455	674	342	245	1639	409	271	476	390	279	245	370	292	466	240	3139	268	293	682	538	8066
1384	2.3	68	109	100	85	61	4227	1650	52	91	587	124	196	2120	59	11484	449	123	865	698	90	442	168	2088	327	323	744	187	480	325	174	219	1774	434	281	1639	276	2808	421	245	105	369	185	2114	333	449	1733	434	5230
1385	2.4	60	114	94	89	83	3415	890	43	75	61	62	1005	1256	101	15785	593	267	754	543	113	384	244	1638	221	999	4841	235	362	450	210	191	1230	590	572	552	321	729	416	549	168	425	100	1776	178	395	2165	436	6793
1386	2.5	68	110	122	430	106	4466	100	108	88	47	52	820	856	106	9089	942	167	1473	2465	190	1079	222	1423	151	530	430	213	937	499	160	157	5096	401	436	1173	342	1386	566	593	128	348	166	2565	265	147	1352	407	3798
1387	2.6	67	119	76	1110	70	3816	170	229	283	52	138	2668	1616	375	2196	245	448	647	1810	948	356	228	773	181	902	1049	261	485	521	252	410	1348	765	436	948	489	1130	148	396	254	371	150	2862	234	334	461	420	1984
1388	2.7	63	90	235	1034	85	3091	229	86	148	78	60	2698	1904	208	379	770	1099	646	143	881	393	151	606	387	1095	301	212	306	490	240	356	2260	375	478	465	423	822	343	326	250	440	320	2927	297	292	1622	659	774
1389	2.8	121	96	616	630	74	4330	199	95	149	63	49	2146	1261	633	938	191	584	361	147	1415	360	242	1395	162	531	12195	290	293	499	258	320	2583	506	231	392	208	661	124	355	147	321	141	3120	177	308	4290	631	2543
1390	2.9	794	468	909	168	81	1780	231	79	526	68	66	1709	3071	782	98	254	168	665	113	769	488	200	2924	129	632	11170	340	379	654	365	302	1401	434	266	502	223	1389	241	415	83	425	237	2078	271	311	1769	573	3838
1391	3	372	1382	112	640	421	2394	191	489	936	69	74	2042	1055	697	197	101	119	771	74	574	650	181	2872	245	725	9685	287	567	666	473	199	805	557	237	1198	273	1086	149	364	213	274	140	2236	293	311	1500	991	4003
1392	3.1	265	721	106	142	616	875	219	198	483	80	77	3200	3774	117	93	600	279	1647	84	74	1220	263	4738	398	709	6773	619	517	575	278	153	1373	248	459	486	259	279	152	275	241	323	224	4184	289	297	1041	655	2737
1393	3.2	78	106	61	253	92	132	485	70	357	130	57	1730	4468	100	68	85	133	776	74	81	849	214	772	209	796	4663	404	383	464	191	317	2806	755	229	537	306	332	210	324	306	502	345	3367	288	285	582	610	4363
1394	3.3	60	119	59	91	72	1643	323	101	142	148	84	2484	3340	90	117	30	203	251	98	54	727	210	800	224	766	784	202	476	644	256	206	2545	432	424	756	391	1849	173	386	89	497	176	3191	244	240	136	610	5079
1395	3.4	78	133	57	121	70	3509	164	95	97	83	77	2019	2042	122	53	169	174	87	129	62	264	175	595	165	553	1189	209	257	511	250	412	2404	457	343	853	367	516	182	308	649	487	410	3212	353	372	384	530	2853
1396	3.5	64	210	90	91	63	2830	141	72	95	65	51	1145	2877	172	91	568	185	116	85	58	279	181	442	230	370	1189	198	319	531	289	393	4302	437	386	747	448	503	300	373	517	443	233	2103	206	375	483	806	14231
1397	3.6	97	1111	129	430	78	2466	806	52	114	96	40	653	2794	97	79	380	410	134	83	69	312	202	1497	343	868	626	99	213	794	194	279	4981	545	189	298	293	607	281	285	258	603	203	2049	331	247	4131	880	13910
1398	3.7	86	3214	726	398	82	906	754	52	125	89	34	417	3743	1487	291	949	161	198	108	93	804	313	1447	224	397	1616	216	477	1073	264	232	2507	694	464	722	238	479	293	291	260	1379	196	2922	225	286	573	694	10232
1399	3.8	77	10330	145	103	60	618	606	111	126	57	98	991	4161	456	1068	508	209	1216	117	100	422	280	1423	122	463	865	282	338	551	227	334	1505	291	455	829	451	446	221	333	342	1305	125	3111	264	305	713	697	7419
1400	3.9	323	15368	118	78	313	214	121	98	115	73	959	1168	2082	495	471	1073	479	506	124	504	552	144	1029	213	577	1417	246	447	737	337	372	3096	201	648	422	326	1199	237	382	491	1183	119	2991	162	214	263	409	8138
1401	4	103	11115	109	61	89	249	130	62	96	192	481	1503	4563	815	1213	400	1054	462	176	764	712	255	723	666	597	866	443	609	758	229	211	3741	244	286	663	242	676	176	313	376	1140	67	2754	458	351	221	433	10737
1402	4.1	116	5428	112	142	179	237	133	68	101	143	687	2462	3840	275	413	100	501	1264	245	1234	1234	206	1486	358	821	762	172	289	749	317	167	3773	202	399	552	222	1367	186	295	236	1466	67	1027	330	364	296	333	7391
1403	4.2	96	15742	88	296	327	781	144	78	71	72	377	293	4039	97	104	54	220	674	63	1243	650	223	1153	312	752	439	233	466	704	277	157	4390	272	310	2006	272	1035	275	340	88	1307	169	1265	314	172	362	537	2744
1404	4.3	92	14633	91	385	549	3028	79	73	93	55	511	1163	4453	96	85	87	155	125	83	2069	972	180	945	286	440	735	227	252	1004	281	278	6142	676	516	345	406	2576	289	340	186	1162	241	1730	402	260	431	450	3189
1405	4.4	89	15593	56	1465	485	350	84	160	63	96	1031	1467	1025	144	71	72	196	518	72	2235	1086	181	1041	218	371	433	185	282	683	162	260	6756	337	488	440	211	1840	203	261	329	1034	321	2112	364	397	398	581	2344
1406	4.5	101	11480	84	559	88	660	55	93	316	80	232	4343	1809	93	490	378	934	335	83	1873	1166	121	4116	411	506	475	194	229	870	225	268	2674	738	528	1428	265	1011	259	333	164	1206	119	2223	214	243	311	398	2158
1407	4.6	184	14946	82	77	85	698	46	87	107	46	243	2821	1493	81	859	392	295	508	106	1135	1123	298	5902	285	584	847	375	387	715	167	282	2963	469	477	256	232	7221	213	297	150	2376	155	1251	197	334	287	429	2315
1408	4.7	90	2730	245	74	52	2767	128	88	114	58	72	2001	886	81	867	1394	1056	680	181	119	344	184	3054	259	469	300	114	334	576	193	172	5069	338	443	168	256	652	557	323	103	1462	85	2316	417	244	351	472	2360
1409	4.8	106	967	103	63	67	145	86	83	84	51	116	2396	985	323	577	301	1057	1678	669	973	1092	158	1133	189	545	442	200	473	799	153	149	7771	359	510	304	255	1338	267	343	178	701	105	1218	300	397	456	535	3827
1410	4.9	80	589	78	54	71	284	119	89	99	541	228	3048	1603	76	66	75	595	91	1108	108	618	188	859	120	743	577	326	343	694	177	259	3345	199	368	289	324	338	505	415	466	449	173	1557	158	413	4975	1266	1897
1411	5	73	142	1065	32	53	97	488	84	128	205	305	1318	1521	161	91	92	1269	313	218	65	736	172	935	287	835	631	296	531	981	162	142	4097	243	191	263	361	230	301	366	268	694	349	1643	361	339	2617	1029	4896
1412	5.1	68	120	1354	413	48	96	1047	58	113	70	121	416	1950	1168	245	69	872	133	464	275	1077	157	784	258	977	567	240	228	574	225	134	5565	489	338	580	393	452	515	391	259	831	242	788	179	333	1562	1306	16245
1413	5.2	90	726	159	461	61	128	1190	79	84	62	192	218	2284	185	1348	130	1147	84	548	582	1132	130	1665	461	531	273	216	370	672	163	494	4367	266	288	275	425	1478	3088	326	394	800	291	2193	323	410	1314	369	10725
1414	5.3	93	828	108	318	42	129	1435	87	279	60	117	481	2770	100	540	69	1005	86	82	537	1196	181	1912	171	469	576	281	417	823	140	198	2517	300	205	196	460	714	4608	478	186	358	236	1478	332	365	1661	417	3583
1415	5.4	269	2107	375	232	69	89	1369	60	113	52	95	1026	746	78	92	46	620	101	97	1445	1142	191	1942	446	1076	682	141	391	634	215	136	4931	292	234	294	275	802	3778	492	178	469	90	754	363	197	10520	669	1113
1416	5.5	91	2633	293	812	50	77	235	72	86	63	108	3515	1444	85	84	75	379	66	91	2970	317	326	1435	472	236	622	102	342	730	180	256	4802	374	326	269	173	545	5451	408	391	588	300	648	223	237	4244	592	4181
1417	5.6	83	3759	1164	217	1322	74	101	143	107	72	241	2998	1546	82	139	97	180	309	431	6143	408	206	726	278	380	694	277	379	588	244	478	6741	431	213	275	356	1526	2639	419	269	269	126	691	325	396	2407	434	5681
1418	5.7	74	2952	894	123	69	176	61	74	273	51	677	2411	5768	115	75	90	326	219	951	6231	867	157	986	357	387	545	163	314	805	164	355	1604	377	347	227	208	859	801	457	432	368	74	431	118	293	1885	1705	4154
1419	5.8	63	355	1013	105	81	1172	77	78	474	565	435	1788	3724	136	77	94	1097	788	356	7466	491	234	1931	241	618	579	146	413	703	165	287	3830	308	329	221	321	604	1012	775	171	302	73	2166	336	296	796	581	6445
1420	5.9	123	101	145	249	97	2061	83	92	911	1307	385	1530	1728	344	52	349	1254	2054	115	5956	842	240	2862	249	658	503	407	477	1198	158	228	5203	300	275	215	211	890	2267	1114	139	1021	270	1409	198	350	3134	506	11515
1421	6	187	90	74	360	134	3334	80	95	555	575	225	1425	3591	175	50	636	382	510	123	6726	722	223	3775	143	745	869	208	546	669	141	357	7177	392	451	340	292	798	532	600	315	805	103	2128	194	215	3456	524	14442
1422	6.1	225	84	112	100	161	4138	100	72	509	313	193	2913	2968	92	290	430	157	82	123	6216	790	255	543	177	819	2474	306	437	917	158	407	3086	364	516	436	265	463	442	475	252	694	183	1194	296	241	716	349	6929
1423	6.2	92	87	90	124	140	3293	72	86	784	688	360	2635	3900	99	978	705	108	95	98	5821	434	219	624	280	309	12963	234	366	917	168	199	6317	440	172	295	225	561	538	362	172	487	247	1720	324	181	153	361	5510
1424	6.3	911	66	106	383	159	2930	58	108	118	826	176	1639	5978	119	157	541	106	63	94	6240	584	180	1072	266	319	13732	293	413	1322	137	151	3218	341	328	390	255	371	1033	320	226	229	79	2418	356	378	361	434	5498
1425	6.4	368	88	109	597	356	3309	39	82	121	132	169	1419	2790	142	59	911	102	127	103	3354	371	223	1859	215	293	10389	421	332	797	186	210	6562	232	443	230	266	514	877	322	237	305	158	1615	198	479	479	10342	6165
1426	6.5	156	51	89	1011	108	2086	72	102	131	101	179	636	4836	75	60	100	175	147	164	1073	574	162	1463	199	353	9680	276	341	858	198	115	3965	244	403	256	743	319	1045	411	264	326	315	250	253	223	463	4560	1742
1427	6.6	78	93	85	100	65	2039	70	84	98	201	551	1204	2286	131	49	81	189	121	105	1316	435	281	607	278	423	4943	81	245	1021	186	63	6509	213	446	544	340	285	1972	418	244	330	413	203	403	467	13591	2855	1079
1428	6.7	81	90	112	81	76	1123	65	38	104	61	950	1814	1825	1188	49	777	103	81	86	352	425	235	1036	225	587	1597	221	428	742	197	277	12187	491	490	428	215	359	742	327	93	296	196	383	216	424	1680	849	3213
1429	6.8	52	330	902	82	45	4493	48	36	113	410	513	4268	2143	187	79	364	92	396	87	1179	409	180	678	278	603	632	214	315	695	174	132	9403	493	246	566	215	314	373	367	152	351	90	330	138	258	1618	869	3273
1430	6.9	38	2492	896	81	51	4643	71	64	112	92	545	2283	1291	441	178	92	107	1004	84	1411	304	184	501	485	448	971	136	309	559	202	231	8108	480	202	314	462	232	1426	378	185	362	138	1506	263	245	398	539	6937
1431	7	50	1207	1009	162	46	2582	64	91	87	55	777	1810	1035	1445	78	92	132	1618	106	730	527	201	861	396	410	1020	165	467	575	231	430	7018	192	352	576	357	351	2320	412	260	294	97	2365	281	301	229	602	1481
1432	7.1	33	92	336	65	75	921	86	48	118	57	326	2289	2123	1308	59	93	99	105	302	897	265	163	826	236	399	616	193	425	687	295	212	2440	380	296	472	586	427	1432	459	165	352	200	2561	82	371	412	1827	1708
1433	7.2	48	80	718	78	82	130	49	70	106	54	120	4589	3646	147	76	84	93	109	740	1007	384	284	1261	592	385	3700	240	314	702	299	172	4188	396	516	226	349	366	1129	387	450	674	122	909	115	322	465	190	664
1434	7.3	62	99	168	95	57	283	43	102	90	96	70	4901	2567	67	54	112	286	122	478	1583	412	121	2207	529	594	1046	312	298	778	157	262	2506	245	611	205	498	253	784	470	323	564	185	1761	276	215	15480	408	2346
1435	7.4	1174	94	85	85	71	1010	770	49	107	105	85	7133	3328	97	88	92	70	377	1242	1207	532	138	566	393	704	1407	268	478	817	191	174	1155	213	395	330	388	392	387	377	296	1394	81	1652	187	346	851	239	10414
1436	7.5	1022	62	225	406	70	1101	98	92	331	76	86	7107	1036	90	73	91	143	95	1053	1130	468	264	1165	241	670	377	327	401	1030	204	401	3553	444	345	350	517	335	531	442	112	893	148	1932	207	234	1893	357	14923
1437	7.6	116	119	715	144	103	107	114	65	98	48	322	9199	1820	65	91	145	109	90	874	1056	1240	200	1605	292	696	1036	108	474	1050	187	235	4768	512	273	340	617	271	539	349	160	1199	116	2442	213	261	854	371	10357
1438	7.7	73	38	129	595	1076	93	79	402	185	56	240	8908	1268	56	78	1418	127	66	1280	845	334	169	1924	317	1042	575	371	258	777	195	84	3088	206	185	519	502	281	411	335	230	961	178	1753	375	376	367	357	5082
1439	7.8	37	63	134	1110	963	36	77	869	989	45	181	10531	2580	97	398	223	384	317	1062	1299	356	177	2301	319	484	762	174	385	684	194	343	1535	469	309	337	411	305	504	333	212	1019	270	2462	428	307	896	465	7460
1440	7.9	47	1433	113	77	67	66	46	797	1066	47	151	11918	1145	112	980	320	800	151	114	245	1194	147	435	513	687	710	152	280	727	177	250	2624	519	406	321	533	252	294	336	217	1137	275	2218	284	316	687	10395	9265
1441	8	99	2107	91	68	86	86	57	114	539	70	397	10279	1128	141	479	1207	348	202	102	808	932	244	990	249	304	717	303	344	861	140	234	3273	314	419	348	594	133	311	387	359	1172	192	2415	545	308	271	3912	13137
1442	8.1	60	2048	126	65	105	102	66	86	102	54	305	10400	1205	91	156	747	376	151	104	310	835	115	1527	517	777	7887	246	274	840	166	177	3460	490	337	473	404	176	177	393	199	1000	104	2386	251	158	2456	636	11299
1443	8.2	71	262	65	54	90	83	61	55	121	488	350	12125	1250	65	1724	153	99	62	218	180	1207	250	3961	452	839	9696	420	400	548	127	160	3066	357	344	412	401	214	160	380	164	1157	123	2232	246	218	983	349	10232
1444	8.3	64	66	92	39	79	1056	47	81	91	567	530	11267	2353	188	1536	110	524	98	126	357	1040	143	4457	312	949	2975	128	522	695	162	278	3309	212	506	251	322	292	402	378	300	1122	172	557	220	376	376	474	5067
1445	8.4	69	83	315	55	68	2156	64	82	140	70	264	5008	605	772	587	110	1250	371	654	786	1016	184	2107	611	1242	633	85	340	518	150	72	3845	261	413	257	160	278	369	289	419	1132	146	631	204	353	223	3314	8149
1446	8.5	70	70	108	77	73	1728	43	88	125	52	123	3994	556	945	936	144	1024	956	737	61	755	247	668	457	670	1612	299	351	691	104	229	3736	281	494	339	293	303	405	388	132	961	250	764	201	344	248	396	5887
1447	8.6	74	66	137	110	80	3295	71	55	370	56	278	8351	2014	825	1040	67	95	1218	101	77	876	434	538	298	910	771	143	315	754	219	164	2309	264	377	586	263	379	350	355	495	920	169	1016	235	190	491	492	5448
1448	8.7	228	52	490	761	68	1399	93	101	105	36	350	6796	4300	355	275	86	110	95	156	14	980	191	848	211	766	810	97	518	787	155	70	1036	419	328	460	186	334	172	413	333	1627	167	1418	304	210	585	1176	5684
1449	8.8	330	70	224	699	81	189	64	64	531	37	114	5725	2477	740	85	69	116	897	123	93	1670	171	1424	316	839	302	94	297	919	181	120	840	218	273	384	289	316	152	434	245	985	185	969	320	294	379	680	4381
1450	8.9	393	146	83	200	65	112	59	43	376	51	371	3003	1717	334	76	102	79	1470	85	86	817	156	1946	413	704	1306	116	311	755	299	671	4977	278	416	471	249	683	155	331	338	1016	123	834	236	306	284	1807	5766
1451	9	93	304	129	62	111	89	401	87	282	62	1268	2011	1192	398	115	82	93	68	44	55	782	235	3488	545	1106	460	247	530	1131	282	443	3053	439	323	657	519	714	164	351	227	1559	288	2045	152	334	357	694	4965
1452	9.1	77	870	88	45	73	103	100	77	87	152	307	1078	2701	103	553	98	62	52	807	89	867	146	4041	282	656	736	164	416	1039	369	354	3220	306	124	714	312	765	160	280	403	1505	204	2203	262	301	269	783	2118
1453	9.2	97	1773	116	208	407	88	147	126	286	195	100	873	1312	108	903	104	72	223	112	63	1036	174	2038	442	662	538	2831	269	825	319	183	1933	467	265	452	205	471	163	360	499	1037	186	1554	244	260	421	843	2688
1454	9.3	56	96	79	635	91	97	175	88	99	682	228	975	3118	82	92	408	99	545	90	141	977	172	1039	182	688	436	4214	478	813	390	279	5810	301	312	625	194	825	239	408	120	453	305	1425	167	169	566	714	11120
1455	9.4	57	52	239	392	85	102	72	79	102	85	208	838	4519	46	236	1303	101	476	83	68	684	222	1034	275	570	631	3384	687	1053	495	321	6707	363	527	349	251	511	194	294	189	240	190	1980	345	201	317	315	10680
1456	9.5	68	75	1502	504	53	85	351	58	236	131	139	2299	5214	109	688	1266	56	1628	895	77	1072	167	1186	409	244	831	3371	438	842	508	160	6112	313	330	384	209	760	181	312	203	1678	107	1745	244	357	262	277	3525
1457	9.6	109	46	577	55	193	111	1403	102	715	279	151	3390	4722	88	82	335	179	683	1020	86	982	193	502	525	356	353	2870	500	769	505	196	2196	440	678	322	239	823	198	276	91	576	127	1480	225	316	200	493	4350
1458	9.7	429	59	85	60	94	61	1018	45	76	69	128	3380	6190	33	55	1066	230	1044	684	63	1120	198	1002	258	399	613	3757	294	924	588	69	937	350	705	590	328	1159	123	371	170	363	116	683	226	329	371	573	6129
1459	9.8	54	39	88	69	82	101	586	100	491	37	170	1748	3541	53	102	243	133	1144	111	99	736	191	1224	227	505	502	2606	359	955	546	259	4326	209	186	531	232	671	160	354	199	378	150	1066	294	293	303	460	3883
1460	9.9	88	57	79	75	84	100	232	97	340	65	131	2061	2799	100	148	64	196	130	29	64	956	198	1497	245	342	1048	2918	325	978	1151	179	3514	297	260	686	304	1073	165	342	374	355	373	508	360	231	149	958	5570
1461	10	51	247	90	66	67	956	96	78	159	38	128	2247	2783	89	94	43	239	157	606	143	1065	113	2495	334	532	824	3040	754	912	522	276	3087	257	418	437	316	831	136	409	231	306	326	603	451	343	400	1466	6412
1462	10.1	63	538	64	81	85	1496	196	292	683	58	91	2743	4037	93	79	113	221	78	190	126	530	160	1187	242	717	546	1994	318	744	459	345	1798	184	333	623	133	3734	158	445	140	316	202	982	316	260	368	10067	3921
1463	10.2	117	243	643	72	80	3448	207	200	435	41	75	1017	5276	91	79	266	173	242	116	88	942	242	715	361	640	933	1428	426	882	700	182	3449	354	207	404	253	1242	226	391	167	740	165	1677	394	311	366	5864	2068
1464	10.3	79	210	625	83	619	3196	265	633	427	50	297	662	4267	276	58	87	396	119	113	168	1032	190	1616	375	508	545	1528	280	940	386	272	663	490	276	442	248	822	190	456	124	234	63	1578	273	351	267	861	3938
1465	10.4	554	252	48	222	636	2364	1180	379	98	30	654	946	4261	541	107	60	833	803	95	487	820	154	1503	227	369	583	3024	498	656	512	188	4511	398	240	486	401	2733	595	457	197	298	66	1425	213	279	415	597	10441
1466	10.5	803	182	54	898	1087	1675	1224	197	112	43	288	200	1787	1352	53	386	1104	717	228	1620	994	195	2271	609	616	588	1026	562	787	344	184	5004	489	322	454	221	791	385	447	186	310	148	1465	188	381	647	748	19369
1467	10.6	179	132	60	1558	88	2675	172	95	319	70	336	151	1644	109	265	359	102	281	86	1702	885	206	3760	245	594	609	2133	252	856	543	239	5820	324	443	892	180	264	469	480	197	352	373	1211	240	275	287	1094	13474
1468	10.7	34	81	44	454	57	3004	159	77	131	55	456	139	2410	56	102	1174	100	475	106	530	1069	189	3439	349	448	773	1457	569	789	369	357	6936	342	112	551	301	253	2487	350	350	410	251	868	212	286	181	506	16029
1469	10.8	86	919	48	186	70	1782	191	112	92	60	91	547	1191	46	61	190	107	356	100	120	826	191	2131	243	1066	607	1676	409	964	251	370	2889	236	158	176	327	2665	1479	331	287	383	179	1239	265	218	190	531	18756
1470	10.9	46	636	148	84	96	2676	319	144	122	38	75	1301	733	70	70	107	266	1092	89	452	902	180	743	294	725	528	1472	505	1117	517	271	1150	297	122	417	162	1308	1063	345	392	291	193	1624	376	374	144	506	18234
1471	11	84	77	69	77	59	4806	362	112	98	389	40	1283	1155	261	70	141	130	224	110	1187	974	293	911	337	626	517	1775	384	744	182	287	7067	285	221	905	332	1472	1285	326	187	422	155	1094	442	339	341	314	15686
1472	11.1	78	109	365	58	64	2925	315	97	120	392	62	761	1161	58	85	1114	159	108	575	338	607	175	1257	135	826	748	1904	901	703	300	467	3249	637	412	779	415	765	1495	306	185	463	159	1110	163	464	2096	591	16269
1473	11.2	283	63	109	63	63	2992	210	76	93	743	42	454	781	91	219	1094	141	559	708	772	491	147	880	124	526	535	1060	347	628	465	404	2342	250	107	935	278	716	778	310	137	261	110	1179	253	482	1607	775	5551
1474	11.3	503	79	939	711	657	3035	184	76	80	253	95	460	1467	98	749	975	99	372	769	146	686	139	1243	169	301	575	1839	259	860	360	374	5792	316	156	799	268	123	365	440	177	323	306	685	275	279	665	332	9726
1475	11.4	57	91	1464	882	86	2895	202	105	98	92	36	2532	485	194	1318	1432	441	935	114	111	1109	202	560	170	671	927	1898	361	771	469	414	8148	347	168	890	146	81	513	449	236	260	193	441	253	223	525	558	14473
1476	11.5	44	186	597	75	61	706	661	60	60	88	56	4453	2027	42	160	94	308	373	103	60	1374	214	577	140	452	1853	1398	379	756	518	87	5908	292	254	970	166	709	486	475	268	482	70	1298	275	346	1678	565	15085
1477	11.6	63	118	74	48	32	554	116	72	103	74	617	4089	2226	49	71	352	288	556	244	54	790	183	722	260	334	848	1336	396	892	221	296	2037	272	549	584	279	879	813	497	191	1020	256	2088	127	365	4715	13850	12118
1478	11.7	96	685	91	85	75	1175	124	121	107	92	747	2264	577	43	448	94	120	297	196	70	478	161	1050	263	411	812	1523	433	741	605	238	998	511	300	735	484	1073	384	461	213	1269	127	1371	269	356	495	877	9919
1479	11.8	268	2634	104	98	74	1202	123	120	232	61	856	964	1155	41	118	85	225	459	92	112	609	140	2902	478	577	509	2026	300	1194	432	568	1021	319	411	970	554	1283	418	516	301	852	123	1640	158	258	1899	761	5897
1480	11.9	85	1174	64	690	96	1276	112	102	919	68	45	905	3136	50	431	356	128	735	50	86	1269	176	6309	268	586	755	1696	406	939	725	183	4017	212	208	1124	341	3928	400	368	309	892	167	1165	181	239	372	873	10500
1481	12	75	138	78	723	73	2525	115	92	1003	202	54	777	1895	68	1206	181	144	851	82	71	1158	180	2759	232	438	862	1160	459	966	680	365	1953	314	421	806	496	1122	462	398	237	974	290	1876	195	366	561	682	8285
1482	12.1	67	93	87	1175	80	2907	147	66	560	65	37	2568	973	90	1933	102	360	2094	106	61	936	183	2812	318	607	679	1065	433	1154	858	410	3803	254	294	1429	373	692	1418	406	188	997	130	1719	294	241	852	583	3620
1483	12.2	63	180	396	111	68	1107	124	429	133	73	110	1306	1030	76	1895	251	99	496	101	61	999	239	2015	250	295	701	1510	338	986	525	506	3514	479	110	570	357	1058	513	399	172	1026	263	1568	317	268	334	300	6067
1484	12.3	73	104	106	105	67	928	174	449	118	96	93	3757	2258	21	185	751	168	601	97	57	831	241	1566	135	306	547	1848	337	843	681	272	9940	404	141	1492	327	201	951	378	134	1390	181	1163	278	186	1687	459	8810
1485	12.4	80	100	87	111	53	2314	136	236	67	183	71	2029	1919	250	92	487	78	342	258	74	994	122	770	247	467	586	2213	394	790	569	264	6608	259	261	332	339	346	805	440	123	1092	162	411	232	424	6902	357	2834
1486	12.5	126	96	87	94	63	977	110	108	77	555	30	1845	1266	242	194	804	100	1527	1429	308	958	239	555	228	373	372	2065	477	643	1264	297	6323	165	106	522	527	971	593	511	254	966	211	514	392	190	1540	215	3282
1487	12.6	154	72	904	86	59	2264	125	70	115	82	54	2025	1034	109	64	869	151	111	106	120	708	132	1025	244	538	573	1915	449	588	1315	317	870	377	153	2322	471	994	614	602	190	932	375	1994	137	310	778	498	3489
1488	12.7	227	43	183	136	66	2240	100	76	103	53	7	1935	1964	178	201	347	238	101	91	1642	1007	198	499	267	622	800	758	328	627	972	225	1290	398	291	1196	207	920	361	431	150	1129	71	828	282	275	811	2232	10319
1489	12.8	215	78	43	819	73	1951	54	66	124	94	30	714	2053	151	61	206	151	82	65	661	1072	187	453	104	383	244	1210	321	819	495	107	896	323	434	383	340	542	232	499	127	1188	111	2052	223	278	183	1404	12032
1490	12.9	53	74	61	1338	84	1718	72	64	90	58	31	1220	3681	105	125	692	148	58	87	120	707	127	626	148	403	500	1173	430	694	499	116	2256	258	591	724	414	1392	324	545	220	1003	176	542	268	290	2100	1706	11516
1491	13	64	83	117	83	61	1409	93	91	83	52	26	1044	650	66	93	88	74	79	171	285	868	237	500	278	280	662	1336	321	585	522	286	5505	406	337	485	461	536	502	552	151	1724	150	1795	144	168	870	983	11030
1492	13.1	59	99	142	104	315	2305	81	58	116	159	29	1644	364	52	48	118	247	69	123	375	910	184	848	213	391	991	258	338	822	497	229	2616	392	336	306	392	543	197	419	142	899	112	1335	275	381	1747	1016	9650
1493	13.2	54	57	364	128	1067	762	95	53	205	79	330	3787	647	230	65	53	1700	71	102	1217	1090	254	695	167	309	777	1580	410	573	480	148	1522	452	129	679	456	1077	645	500	182	1020	123	1145	165	292	3051	700	8218
1494	13.3	33	146	520	74	161	2381	98	24	85	90	1054	2417	400	987	92	62	544	88	108	195	921	182	1490	140	401	982	472	364	735	550	310	1248	312	477	576	213	856	478	444	316	1432	189	2006	343	375	1301	366	5067
1495	13.4	59	332	148	688	335	1723	363	60	119	62	1728	1388	274	366	71	30	1482	76	149	27	834	223	2135	188	438	829	1042	341	714	600	402	7574	251	265	322	381	708	383	447	225	767	346	2075	258	335	1720	478	3967
1496	13.5	112	1508	895	96	721	3220	873	51	100	66	2224	1651	1697	641	80	39	233	57	83	57	785	196	1247	318	276	378	1489	267	618	655	171	4961	264	266	292	292	610	420	404	237	1075	138	1921	249	260	3092	302	8778
1497	13.6	66	964	247	101	311	2065	463	387	289	507	1688	1057	448	589	463	1410	244	41	200	78	911	247	1121	205	301	436	502	293	731	659	310	1165	302	445	707	548	198	332	496	223	1080	350	616	235	327	740	1012	8206
1498	13.7	51	629	104	160	72	2073	1001	110	315	803	715	2428	3873	840	777	996	161	382	95	85	334	136	1382	339	444	758	1256	306	657	550	208	1925	362	399	513	495	241	352	426	276	989	73	941	243	232	212	620	8422
1499	13.8	72	94	78	112	60	2099	900	61	133	69	1694	1527	2691	1301	1696	930	113	624	113	244	560	155	1584	239	646	419	766	490	835	328	182	5155	330	352	230	413	527	896	329	273	1427	157	581	265	342	1724	376	5774
1500	13.9	115	108	84	56	66	2836	211	66	145	69	1277	1569	3398	1004	792	124	101	699	109	1402	849	159	1414	102	780	716	901	193	767	564	151	6586	303	271	408	404	255	1306	641	316	1312	241	371	290	346	1172	505	6971
1501	14	47	108	154	132	95	1878	115	95	143	47	1206	995	4975	949	1361	142	79	864	88	1052	581	190	1014	168	489	354	757	449	660	321	68	1761	222	347	310	347	956	685	495	233	1017	372	1056	305	242	936	493	11399
1502	14.1	61	94	1092	608	259	2915	102	54	128	82	702	789	4678	842	837	95	155	611	73	2036	302	111	785	218	1293	503	564	329	650	408	195	1127	308	188	211	441	656	629	351	76	1710	260	675	268	254	875	400	6701
1503	14.2	48	99	300	1877	97	2321	115	65	117	54	1014	1073	4126	766	444	51	488	2046	88	2170	764	198	881	116	793	380	593	376	644	379	180	1754	348	185	241	505	280	728	362	302	2405	77	1420	287	188	1219	220	4027
1504	14.3	86	82	164	1320	107	1189	128	60	80	104	538	900	4391	1844	58	60	434	1687	875	1127	286	137	763	223	597	774	426	566	1134	275	249	7059	308	530	338	323	527	548	406	285	1598	99	2032	235	405	709	358	2807
1505	14.4	78	168	82	107	92	1229	105	84	90	78	983	2106	3673	865	71	886	161	1031	576	903	322	203	951	125	902	467	1309	275	823	480	468	1145	288	555	282	499	302	595	317	71	914	114	1257	493	339	832	320	9362
1506	14.5	67	2718	91	108	76	1749	115	93	668	77	839	2172	4655	90	88	85	88	681	106	2426	252	188	994	208	1081	356	790	288	652	331	267	387	319	486	217	416	1735	504	209	201	1244	208	1288	311	232	2395	421	1567
1507	14.6	347	3328	95	113	53	1686	1128	73	990	313	1413	1558	3697	347	62	89	102	974	105	454	687	168	1088	226	183	834	279	453	994	356	139	1564	534	717	233	398	3622	684	355	105	631	179	988	227	336	1969	915	7195
1508	14.7	337	3259	124	93	59	1698	798	74	163	111	94	627	6089	501	249	65	69	91	113	476	617	154	1443	102	520	1545	443	203	756	407	291	10742	253	771	210	243	806	655	397	172	974	211	1838	423	345	1048	14094	4643
1509	14.8	81	4371	115	127	68	513	82	89	117	48	233	196	5625	117	291	59	83	82	88	349	847	182	3086	352	190	1125	685	327	752	445	216	3300	319	379	271	212	3539	586	256	138	750	160	2421	220	311	742	708	1615
1510	14.9	60	3111	83	116	137	159	92	152	293	233	104	754	3804	268	1365	85	107	63	98	111	1019	190	4606	199	201	2238	1255	437	787	506	119	2157	252	381	262	575	23558	600	421	171	1333	121	2321	201	270	1654	703	8480
1511	15	37	6137	67	95	59	157	96	300	121	90	127	1945	1554	47	388	70	170	86	200	804	337	188	3594	113	297	202	620	276	602	713	448	1863	281	465	247	282	17382	564	405	142	2138	332	2137	353	253	681	954	13802
1512	15.1	665	5897	692	97	57	101	407	1044	143	71	904	4131	3789	64	65	125	599	86	104	161	376	195	2018	131	354	755	503	386	699	431	223	3124	312	531	161	347	21201	715	303	92	1542	204	1401	334	211	925	527	11766
1513	15.2	481	6942	102	93	63	181	127	247	336	56	599	3342	6478	223	51	52	708	500	83	567	469	226	1490	151	824	3967	1262	413	687	461	551	4707	376	464	323	222	8735	998	274	65	1170	76	377	242	307	743	1390	7686
1514	15.3	545	8033	86	587	83	576	112	93	1145	277	1410	2310	3038	455	59	326	631	372	165	444	417	220	997	180	1170	2049	974	568	657	528	188	1433	314	477	283	257	867	396	393	144	1070	89	541	257	333	901	686	5158
1515	15.4	58	8849	235	1093	85	1095	127	91	175	891	876	1275	3109	65	58	1475	311	494	760	754	586	227	1112	406	767	874	1039	302	682	465	276	1045	284	401	390	395	12493	479	520	265	1107	157	671	255	220	383	568	8782
1516	15.5	54	11786	94	160	66	1534	104	106	141	471	1170	1295	1883	70	65	1745	237	621	1226	1349	434	194	1493	55	1208	571	493	283	511	555	171	1635	434	165	421	508	555	797	495	149	809	183	1133	189	357	1856	569	8191
1517	15.6	54	10502	93	393	80	2243	96	107	148	104	599	1029	3762	36	39	608	198	1837	847	993	543	181	1360	367	818	944	584	371	610	506	247	5594	234	236	303	252	11564	922	350	91	1202	103	1426	202	290	1082	646	6226
1518	15.7	83	10804	87	1318	85	1766	61	308	136	75	664	592	2142	77	68	213	218	796	598	118	362	122	550	329	1056	655	1004	408	581	478	262	2868	145	421	255	553	24480	789	289	138	1761	119	1587	205	437	1747	517	6712
1519	15.8	36	14755	207	884	75	2013	66	210	121	84	703	431	949	64	40	81	365	2064	116	375	580	86	865	234	774	813	324	313	586	976	333	1072	509	220	252	364	22227	738	433	113	2341	320	902	444	260	393	505	11413
1520	15.9	88	14753	767	100	53	161	116	71	135	94	361	2187	492	40	446	88	275	1190	93	885	345	296	837	280	819	792	989	342	683	405	498	3760	360	466	332	461	18429	668	451	218	743	299	1299	159	197	824	4365	11576
1521	16	65	2902	153	99	57	110	122	61	109	48	774	3932	422	68	631	90	65	954	93	1160	753	312	817	328	358	834	613	603	515	674	146	1204	472	428	693	505	1864	625	533	315	493	253	1578	276	421	555	10415	7480
1522	16.1	83	6348	133	126	81	153	139	29	95	83	375	4101	1206	134	62	438	794	104	126	2157	669	258	1482	294	1321	401	942	414	679	350	145	4090	354	351	353	383	889	1015	568	181	625	282	1764	1068	385	459	2689	5480
1523	16.2	108	9868	126	84	82	114	110	49	96	83	99	3057	2500	110	46	718	1219	100	137	1713	957	142	3366	83	1212	696	808	503	670	431	355	395	503	447	469	409	1436	521	519	303	874	96	2038	762	216	229	1280	8162
1524	16.3	68	4400	117	87	254	107	189	79	119	68	91	1627	4182	65	57	867	91	262	172	1321	475	155	5510	85	830	726	830	476	776	740	129	1717	314	463	294	523	27359	315	423	276	1297	169	2284	299	243	330	653	10417
1525	16.4	82	11175	170	174	292	103	100	42	138	70	170	482	4156	78	85	1064	95	327	1045	2271	1142	130	5332	239	427	800	1037	754	869	572	262	1684	155	454	234	336	22713	815	539	160	1394	124	1664	658	270	421	998	7939
1526	16.5	39	13242	140	80	414	632	61	54	147	51	113	291	1637	55	79	1241	90	789	93	546	1124	171	2788	174	307	758	1373	370	836	692	547	1726	358	364	1756	243	25924	667	307	92	2150	171	999	1034	300	283	1463	2462
1527	16.6	68	14620	101	57	885	1855	100	28	285	115	100	641	1866	84	112	88	79	603	147	108	1007	159	1926	220	367	535	500	486	622	485	227	4004	297	421	1512	277	27676	515	343	124	1178	163	1435	1080	254	548	4697	1588
1528	16.7	224	2880	1547	372	667	369	96	39	709	718	150	534	2061	233	78	86	74	298	113	136	821	145	1808	183	561	491	436	413	609	745	152	6108	326	182	739	392	1158	464	378	103	1711	115	1687	1108	282	335	507	10732
1529	16.8	84	487	131	254	51	116	389	718	514	649	660	900	1602	225	135	436	102	330	102	85	483	171	814	169	339	340	1309	358	670	419	150	6723	516	412	820	325	2126	270	279	160	1656	249	1910	2752	272	286	1036	13732
1530	16.9	76	188	101	189	84	95	119	162	551	63	601	2292	1694	448	79	171	73	207	84	61	198	141	1312	142	239	696	556	425	739	492	413	3552	297	217	511	154	1641	627	183	194	1586	202	2440	5251	419	274	422	14394
1531	17	98	451	118	298	95	339	109	80	355	44	639	2449	2529	419	80	268	114	288	83	70	1188	188	1392	102	347	231	519	397	567	723	73	1288	310	433	403	434	1872	496	193	77	1636	263	3036	5637	330	346	541	13318
1532	17.1	86	112	74	1184	57	1338	96	48	116	48	206	5449	4719	331	207	860	77	504	372	103	913	132	1733	254	447	3120	1803	453	715	465	95	4269	354	337	639	583	1781	481	423	290	1893	88	2163	9209	237	379	719	11604
1533	17.2	81	216	114	1141	55	3569	198	71	126	62	143	3716	7107	83	149	183	85	239	163	93	825	195	1196	119	343	3338	1844	595	856	441	352	4557	371	370	561	431	1078	586	363	313	1012	89	1080	7392	253	412	821	11902
1534	17.3	98	183	111	125	43	4200	120	58	170	210	458	5537	4790	99	205	1639	389	871	764	119	1134	118	1168	202	345	406	2708	375	807	507	153	4196	459	237	365	375	1564	565	311	239	690	140	943	1201	241	409	1412	9741
1535	17.4	75	240	110	73	79	2003	150	36	138	48	427	5446	5399	74	643	420	470	774	525	102	802	90	2815	202	485	1059	3538	347	705	605	261	5981	455	137	679	388	26332	484	284	181	813	169	2248	2078	245	517	711	6631
1536	17.5	93	232	416	56	112	1709	140	63	115	47	746	7633	5773	43	753	956	133	2728	833	109	1597	139	4228	210	307	546	2471	384	495	561	72	2984	241	566	701	430	26394	523	176	198	736	111	1510	3573	277	2739	323	5544
1537	17.6	323	463	949	81	99	1371	142	62	130	40	217	8466	7093	73	616	72	125	385	951	109	1051	174	2693	142	335	957	2545	763	653	565	413	6249	360	258	506	306	25108	702	282	374	544	168	2129	905	291	9056	502	8568
1538	17.7	593	104	712	738	82	1408	143	317	77	75	292	9902	5617	97	1137	110	153	648	122	187	836	177	2995	287	637	1187	2437	843	644	522	442	2146	391	335	548	352	25093	633	332	108	1223	176	1836	3508	429	1463	533	11273
1539	17.8	141	116	554	777	98	2265	82	549	84	51	167	9538	3118	170	536	160	96	568	94	841	992	237	2250	174	428	475	2372	284	561	326	357	6237	546	106	422	509	26554	594	312	106	1099	94	1667	4149	269	1168	382	5200
1540	17.9	67	96	151	103	99	2656	115	111	95	40	109	10882	3391	578	690	95	152	378	298	670	1285	208	1247	73	307	365	1890	390	657	542	430	4689	507	269	318	390	26550	1104	323	162	1291	214	2468	468	344	1326	233	3017
1541	18	70	132	98	95	78	1538	75	132	106	67	199	10711	2329	989	58	134	115	706	114	840	683	173	1146	147	557	488	1493	399	638	433	124	1088	454	352	1062	399	20466	682	235	220	1060	100	2648	610	267	2973	263	5326
1542	18.1	44	129	94	62	116	88	100	124	94	61	227	12496	5291	757	79	139	92	315	88	116	568	151	451	273	436	902	1899	425	590	445	153	3345	436	424	786	390	1681	739	331	107	2125	334	1610	713	242	705	9742	10676
1543	18.2	80	705	109	71	102	106	130	89	76	99	92	13336	6860	765	93	103	86	119	135	82	1003	135	1453	220	459	263	2222	426	508	456	166	1198	382	464	623	456	2864	788	943	236	1087	223	1931	697	420	1482	5383	14435
1544	18.3	34	1769	166	76	479	123	138	96	108	91	66	12924	4779	1223	108	319	61	101	145	177	627	204	1729	318	470	552	1183	284	1161	745	143	4377	334	503	268	438	7324	719	420	76	1203	312	834	743	324	1167	394	15224
1545	18.4	58	3378	108	97	364	73	223	88	593	102	70	9727	7222	482	82	324	124	89	775	95	793	182	3612	198	193	248	2249	327	944	531	85	2454	574	466	503	435	34188	398	573	410	1850	213	1229	897	251	903	410	11587
1546	18.5	62	115	120	121	145	990	211	100	454	69	296	7750	4397	2900	88	811	881	86	654	596	1246	131	4170	180	550	714	1243	481	879	773	130	5688	706	302	613	262	22619	767	364	302	2585	141	637	625	207	539	343	7154
1547	18.6	179	95	789	65	444	1398	654	109	148	74	286	6538	4632	252	1056	148	643	229	1131	114	1311	174	2771	210	887	496	787	532	962	580	406	6787	211	287	331	253	25656	641	421	392	1995	265	849	916	329	1587	1459	5545
1548	18.7	310	84	565	948	73	1638	1410	64	399	57	175	5860	4997	381	688	91	121	79	98	249	754	206	984	241	510	478	2498	240	570	438	426	6391	745	239	476	453	24143	722	360	415	1548	214	955	932	441	1131	611	9276
1549	18.8	109	149	234	756	71	2149	614	90	125	387	121	3248	4729	104	85	106	109	112	113	89	991	244	844	229	563	248	4069	413	560	399	561	1528	254	281	2425	532	2333	599	540	253	1151	133	2140	1184	275	1231	1496	16542
1550	18.9	926	107	109	2585	87	1970	140	72	86	520	71	1569	4953	59	76	84	95	142	107	98	914	117	658	391	745	344	984	468	531	355	361	980	478	263	524	324	1277	475	412	335	1318	225	2895	1748	528	1478	825	12726
1551	19	226	110	128	5286	70	1305	124	71	61	123	99	920	5766	69	77	178	147	147	358	63	871	118	1211	326	968	520	1212	478	622	617	101	1540	296	299	769	374	1048	420	389	196	878	138	1755	903	409	2936	420	11325
1552	19.1	92	92	1327	8743	66	760	87	68	85	57	113	2521	3475	55	98	93	682	87	1144	82	1126	204	1848	116	649	490	990	373	560	299	131	8148	497	272	787	186	3641	332	455	261	689	313	2561	678	240	2083	282	10876
1553	19.2	120	118	833	19677	96	1032	97	133	118	119	90	1068	3142	110	112	62	120	71	121	94	540	166	2565	193	604	526	1238	363	593	270	462	985	319	332	414	329	1101	383	372	379	1043	125	2572	4750	263	1092	1336	10246
1554	19.3	315	329	86	14779	74	829	102	524	96	66	103	339	4535	631	102	71	84	74	138	121	947	178	5684	292	313	555	1622	245	742	824	270	981	329	322	985	286	605	355	331	225	508	256	2495	4608	289	3918	476	13090
1555	19.4	243	1193	822	18244	80	734	127	66	280	53	128	753	3955	188	193	57	70	102	120	35	983	134	3257	287	256	286	668	629	677	848	110	1325	290	293	340	275	974	319	280	325	1737	305	1784	1301	369	2548	787	7780
1556	19.5	80	1218	917	21289	88	1068	54	49	168	64	1348	1717	2207	1028	186	471	125	169	88	80	1448	133	2909	257	378	2933	2082	1547	714	570	202	5347	470	496	458	319	682	329	310	225	1917	93	1353	5126	125	2377	597	8279
1557	19.6	55	165	516	17086	63	346	222	49	161	68	706	560	5217	732	83	85	101	417	92	84	1137	121	3106	301	413	6728	1602	4708	825	467	329	4853	225	550	544	515	672	358	372	155	2136	100	1020	4062	404	3235	459	6384
1558	19.7	192	112	128	20962	46	109	408	69	137	144	431	252	5453	96	68	70	180	564	83	1216	880	121	2081	172	261	6971	725	2546	845	510	551	3922	283	485	707	251	884	334	347	444	879	116	1257	2877	321	1371	670	11946
1559	19.8	58	94	107	10126	63	100	763	77	114	90	379	650	5028	65	62	271	297	609	99	1555	951	231	1336	184	258	6593	1208	6964	907	421	200	8774	334	120	295	356	525	414	425	161	949	187	1694	1154	292	404	571	12463
1560	19.9	46	70	124	11243	49	90	267	34	108	80	233	895	3545	47	56	111	197	344	82	307	639	177	1101	196	339	4801	1174	3966	997	531	314	2474	206	110	242	394	11182	250	444	330	1186	116	1926	3119	368	1581	911	8740
1561	20	64	112	122	5161	78	122	100	78	126	266	79	2241	1458	50	63	108	120	891	113	328	966	216	1236	180	194	4275	1948	4799	913	635	265	4264	164	217	182	221	12037	252	412	238	1674	94	1188	4606	325	1396	568	7401
1562	20.1	84	152	140	4221	78	343	397	78	108	78	89	1577	4504	52	57	131	156	728	87	1120	849	110	1275	270	141	3998	3368	2202	855	287	334	1678	319	237	676	426	478	305	710	749	1308	79	740	2358	352	467	381	5891
1563	20.2	79	58	236	675	68	360	115	78	92	79	90	1646	6822	71	86	99	578	1681	80	247	721	148	2558	151	339	1516	2193	3593	575	739	368	4061	253	158	298	398	698	447	635	386	1375	149	1658	5322	323	1138	235	10722
1564	20.3	87	73	214	2106	573	594	116	51	80	66	37	1759	7554	90	99	60	390	652	91	64	961	150	3207	330	282	886	1260	3111	456	516	110	6212	274	139	388	346	1733	345	509	546	1240	273	2089	1726	331	412	3319	13288
1565	20.4	60	131	142	3448	148	1650	143	43	91	70	61	1074	6740	70	99	61	816	554	104	63	698	182	4647	132	264	2679	1301	3677	497	876	132	4471	217	217	359	374	3548	235	534	377	1675	251	1802	1755	312	898	20573	3796
1566	20.5	213	119	510	2068	60	972	139	63	118	106	48	1750	8719	50	261	201	258	533	727	426	819	257	3208	163	222	792	1322	3433	480	935	375	5876	180	126	520	583	8381	296	318	305	1996	188	2554	3752	329	808	7064	1092
1567	20.6	77	113	1346	738	58	1662	125	34	139	47	453	1974	8512	140	124	98	1107	975	1622	723	964	446	1156	297	485	437	427	3017	777	310	417	2999	257	62	400	208	23048	229	360	385	1531	146	2201	2921	238	701	466	1919
1568	20.7	43	92	920	955	69	1933	135	56	117	44	2160	2203	8422	91	123	81	918	537	582	2035	1417	508	376	238	280	893	1413	2804	512	190	383	709	218	239	326	282	29927	151	358	316	1446	149	2001	2636	330	591	193	7034
1569	20.8	90	67	1026	380	90	2243	93	50	77	66	1286	1244	5716	133	84	101	118	213	947	1284	906	476	1211	306	224	2485	1007	1385	706	658	381	1902	221	313	202	390	27693	232	390	286	1507	227	1369	2257	287	2615	1351	5867
1570	20.9	60	85	93	741	83	1688	127	79	90	52	1309	1200	6778	274	67	997	121	270	172	640	1095	184	937	310	251	2389	1070	3173	731	301	122	2358	291	354	459	292	12315	197	579	208	1798	261	2163	2407	244	1905	578	4864
1571	21	78	102	154	1290	61	112	213	53	75	57	679	2012	4059	1438	138	469	103	205	90	889	1201	140	1801	228	233	562	946	3583	717	247	563	3162	94	204	401	497	3450	209	633	288	1930	216	1838	2725	330	995	1199	11050
1572	21.1	94	79	100	2191	52	354	110	53	91	59	1353	1904	5679	913	138	304	104	213	491	2000	1203	181	1899	291	446	635	1266	2499	859	263	194	7207	295	103	282	401	2307	579	525	320	1725	115	1692	2510	400	4008	956	14426
1573	21.2	76	90	161	953	66	480	422	206	207	97	1516	2061	6255	1381	112	118	93	254	524	2363	1401	249	1419	571	556	833	2267	2454	814	294	292	8171	226	130	534	562	8553	557	553	326	1098	178	1385	3169	180	466	6190	14423
1574	21.3	57	80	375	96	114	97	1346	521	137	19	1582	2102	6373	293	160	68	87	564	441	2745	1009	188	2328	348	670	1224	1939	2857	548	271	135	3946	56	236	312	564	6567	305	435	555	805	225	1885	3185	334	1253	1823	12342
1575	21.4	45	95	931	107	73	96	826	351	119	69	970	2215	4820	679	159	51	89	1540	1052	862	742	176	5267	351	334	152	2247	1807	815	493	144	2404	160	165	352	220	20447	213	444	302	858	203	2154	477	225	534	1986	11464
1576	21.5	45	83	1087	115	96	68	193	83	108	38	1613	2832	7121	872	85	91	429	1009	1227	764	879	177	4717	304	388	1050	2342	2723	954	590	572	2131	187	106	306	206	1776	371	414	186	1702	160	2301	517	288	353	1296	2247
1577	21.6	31	67	477	166	70	105	132	101	125	79	525	3944	7141	1437	110	601	81	500	528	362	1125	157	4155	226	324	2047	1571	2697	1275	457	166	2553	183	94	363	505	8345	407	486	194	1366	189	950	2069	362	1228	1582	7444
1578	21.7	60	103	1192	335	75	108	104	104	139	49	1232	3043	6271	2059	642	567	157	1085	852	96	1147	150	3049	484	327	1060	1550	2078	2052	301	232	1704	101	227	656	312	657	134	521	209	2339	256	942	2917	464	1236	2200	11737
1579	21.8	49	885	3024	254	60	346	107	90	108	100	983	2793	4265	1212	217	94	84	519	1177	960	969	272	994	384	324	1918	1531	2765	753	390	240	6358	258	169	476	470	1313	174	534	397	2221	161	1266	767	385	750	1806	15632
1580	21.9	59	96	2963	137	76	1477	88	112	76	62	1273	3217	3434	1195	59	97	80	196	2731	1602	939	267	666	210	358	1414	663	1971	992	361	745	2938	111	227	570	477	2266	474	428	297	999	199	1902	5018	318	894	1345	15177
1581	22	59	82	96	128	56	1990	82	97	101	55	697	1371	1154	1373	165	70	72	128	3085	425	1285	149	1384	174	872	148	586	1807	827	392	243	2312	206	129	553	570	3494	390	438	95	1254	263	1476	1298	386	1114	2540	11760
1582	22.1	137	41	75	126	37	1345	119	83	115	629	975	501	847	640	1094	65	230	68	891	187	1030	108	1382	459	664	960	1316	409	884	466	116	3445	189	85	357	317	837	180	585	288	1460	108	1385	774	331	676	2954	13823
1583	22.2	265	55	127	181	136	70	106	82	97	292	594	2837	2247	1493	1204	81	147	47	1077	212	1255	124	695	359	1004	925	1263	566	920	446	175	1808	252	123	314	263	2151	202	408	204	1683	91	860	554	287	1190	882	10465
1584	22.3	96	141	641	407	85	80	246	77	113	67	261	2175	3127	1624	543	89	70	47	197	148	1407	185	1090	159	1036	1564	978	401	870	385	402	1122	63	306	420	296	519	242	354	194	1270	72	581	679	275	840	1170	4199
1585	22.4	61	294	798	135	60	70	165	54	121	61	977	2347	3925	8259	658	76	234	57	1384	362	866	189	373	402	699	2156	991	379	947	231	263	2327	252	187	362	236	824	236	435	228	890	87	833	765	313	1398	303	6916
1586	22.5	142	165	113	124	75	64	79	63	568	69	1000	2371	5186	10415	281	1113	791	57	497	304	877	172	644	402	387	1327	1414	258	912	629	327	12092	170	201	310	330	218	255	562	551	495	98	752	543	357	306	536	13020
1587	22.6	288	421	142	126	70	47	57	71	880	45	986	2102	2535	17342	206	555	7366	59	231	64	1347	117	665	334	345	665	723	377	904	391	210	5237	274	209	169	313	832	275	404	224	479	258	1700	740	317	652	300	11678
1588	22.7	97	1978	137	259	72	224	60	63	1265	35	1152	728	1626	14770	233	2023	14356	404	362	45	1089	195	1191	415	968	605	1251	365	474	434	186	991	106	150	218	325	1986	376	442	293	524	106	2028	675	270	396	1311	10639
1589	22.8	69	134	133	336	86	589	42	265	681	38	1753	1633	2566	11881	104	2028	16766	325	615	60	727	185	3814	406	422	313	1406	271	420	341	236	1162	99	217	420	295	26045	534	488	146	842	82	1606	644	248	385	815	4028
1590	22.9	88	82	384	94	59	1398	78	519	464	74	1467	2588	2499	13600	143	1818	17283	444	92	36	1015	301	4283	465	414	1149	2030	435	485	940	550	1323	65	397	248	276	23490	405	501	157	1351	236	1365	486	414	399	844	9983
1591	23	96	101	275	280	71	1661	93	363	124	596	1072	2346	3204	18128	379	3241	19690	239	82	87	652	255	1001	267	857	809	1023	515	569	522	147	1190	78	769	498	329	26126	497	444	116	1305	204	1920	653	317	353	776	15237
1592	23.1	269	99	112	349	75	894	87	92	88	360	521	2626	3959	16177	338	4528	19449	447	760	122	1072	192	1141	307	568	602	1565	623	514	525	256	4627	217	277	268	240	20168	426	471	324	1710	260	1687	401	248	396	724	11340
1593	23.2	51	220	137	95	71	2030	26	76	106	73	934	2944	812	11094	111	6360	15676	104	1451	475	939	171	2297	516	388	131	729	501	586	559	131	2955	300	431	395	464	26190	495	605	172	1425	175	1011	490	263	306	499	4354
1594	23.3	71	111	1077	86	56	466	429	118	96	70	507	1409	2516	11253	912	6822	20441	81	1602	1029	1035	144	2759	349	1397	1160	555	558	533	933	265	5629	141	96	477	344	18675	326	400	346	1272	89	1178	655	258	471	8225	8916
1595	23.4	54	94	3401	77	244	137	290	84	130	64	993	277	4911	14462	80	8762	17636	140	2203	1811	1025	201	4596	194	852	534	1672	364	560	667	142	6444	99	147	265	431	840	350	416	159	1059	99	1142	697	277	285	13192	10678
1596	23.5	65	99	622	66	76	103	914	107	100	60	1134	709	4485	13259	55	8821	17795	350	89	527	1035	124	3869	332	898	536	5141	373	688	207	246	5579	180	484	284	359	645	362	473	280	1064	201	1138	376	427	562	2814	13541
1597	23.6	50	65	184	1421	69	89	680	61	109	57	942	606	5378	11134	51	9952	17611	894	86	1483	929	196	1174	423	489	743	5989	401	539	401	189	1862	188	188	338	393	991	393	406	211	1320	216	2338	303	357	2173	1923	3596
1598	23.7	95	50	907	599	366	130	68	74	119	69	1034	2327	3222	15430	48	8857	18684	498	306	985	948	180	1328	301	630	613	5503	564	479	338	562	1386	118	102	377	458	196	606	367	285	1575	224	1030	383	219	991	333	4369
1599	23.8	68	1464	140	151	678	49	93	58	99	216	852	2093	5683	13351	51	6079	20550	1183	92	1425	720	147	1121	506	259	1948	4436	412	527	775	269	3770	62	515	416	477	186	436	334	194	1167	115	1050	2104	316	831	632	14616
1600	23.9	82	1387	329	89	74	214	46	58	120	92	955	2700	1429	8983	64	7150	12115	1087	97	2668	1092	185	484	288	633	718	3335	453	779	962	496	3839	246	530	314	271	414	277	675	365	1212	124	1207	4872	260	2229	487	12005
1601	24	95	953	90	281	108	201	37	591	88	74	609	2531	382	9386	124	5538	19883	1562	91	2719	1003	217	1514	460	842	450	1939	468	460	445	89	2598	202	607	523	381	560	549	669	276	436	69	771	1857	419	299	1988	3431
1602	0.1	194	145	109	515	90	151	92	54	75	60	778	2174	2123	7010	61	6998	9097	2657	92	1169	1067	132	1575	390	253	967	959	431	536	618	417	1196	132	374	416	562	774	382	379	312	591	188	971	957	477	254	574	10790
1603	0.2	67	144	934	156	65	90	87	78	89	65	402	3615	1358	3008	27	6104	16920	461	113	151	640	119	3403	178	316	641	1087	344	678	454	107	1092	172	181	251	284	740	208	390	340	985	410	729	1004	227	1419	1157	11696
1604	0.3	36	111	9409	92	93	124	40	111	80	62	737	3057	3128	655	46	960	17952	415	99	138	877	137	265	231	620	1255	2277	393	645	623	303	5740	263	253	418	355	675	299	427	290	1561	109	807	772	294	1769	646	4886
1605	0.4	49	159	16661	81	111	81	85	103	297	63	389	1649	1748	473	69	551	13179	1822	722	144	1272	198	1007	295	887	767	3330	341	494	702	417	3407	176	277	531	552	628	252	387	658	1957	163	1489	837	266	353	428	5421
1606	0.5	58	107	16419	152	69	477	87	70	185	44	421	2993	1626	203	64	2133	18997	271	740	266	1486	119	1040	427	557	457	1723	417	369	645	266	3594	333	555	235	550	252	191	450	224	1968	67	1958	683	259	1617	597	14075
1607	0.6	74	85	14383	115	54	421	98	83	133	46	841	5377	3662	218	40	4144	19079	124	875	862	1522	192	2456	408	718	628	996	381	545	355	328	7215	236	891	276	593	251	168	379	216	803	181	1612	500	248	1408	4054	10511
1608	0.7	320	86	8519	1017	75	78	70	102	388	60	721	6314	2463	97	443	6597	10839	94	119	787	1122	211	3457	419	546	699	1099	469	532	563	257	9011	192	746	393	484	557	205	412	249	1258	199	1600	470	311	970	8053	3215
1609	0.8	465	84	13660	1543	66	578	78	477	1134	141	1595	7996	4472	73	259	4907	13929	82	107	237	899	151	1108	404	390	676	1146	347	424	591	206	738	158	869	350	499	707	224	379	244	1882	272	904	4468	334	1317	1271	805
1610	0.9	251	70	11999	1481	242	1356	370	270	1276	1004	809	10709	6225	108	135	933	16941	1117	70	159	1029	196	395	332	517	206	3529	359	309	648	59	1268	103	667	261	440	484	265	319	198	1582	180	1023	2610	234	854	1016	5112
1611	1	25	61	10274	1146	39	1578	586	72	930	274	1130	12833	2238	354	730	425	16540	1842	61	378	1353	105	995	417	524	195	2390	446	390	575	148	2314	99	331	332	426	668	303	397	329	1795	143	1011	3865	317	1191	1129	9916
1612	1.1	37	35	8085	2275	89	2307	1493	80	372	43	480	13194	3187	992	1227	730	13980	334	78	423	908	200	2789	269	644	417	1426	389	564	651	108	5201	167	147	203	382	474	295	347	469	1179	216	1299	3186	349	604	1282	2138
1613	1.2	52	74	13035	466	59	1575	927	91	78	56	244	14928	4333	532	1625	454	14278	211	86	343	781	194	4438	466	571	348	1702	366	459	465	147	5304	173	267	237	370	625	306	485	393	1885	270	1272	3908	369	1193	1890	9084
1614	1.3	58	66	5421	159	61	355	1252	66	124	47	749	8866	3132	714	2970	1014	10539	151	67	544	1103	224	1876	344	228	442	810	439	544	974	252	1373	85	365	238	599	476	378	480	412	1810	288	1661	3568	281	420	1626	13135
1615	1.4	89	82	2925	114	81	368	581	156	112	68	188	12956	2998	894	5686	1099	15357	156	406	124	931	145	862	434	333	603	932	491	589	489	633	4278	59	239	237	673	726	183	482	270	992	207	2690	2620	384	1733	558	14695
1616	1.5	64	41	482	114	98	174	103	76	135	46	93	11969	2354	797	9399	1578	17719	92	735	91	940	202	890	254	780	733	961	559	481	426	274	7962	139	228	170	376	339	193	387	339	1049	156	1698	4854	219	1109	934	15238
1617	1.6	73	87	1260	88	75	140	108	66	409	66	118	11979	5482	1336	9067	2886	14259	92	5190	25	1110	158	575	167	832	1244	2275	536	654	743	311	8261	257	516	387	474	459	297	498	187	1414	204	1381	4188	272	419	782	4950
1618	1.7	52	463	610	89	76	119	176	77	136	55	154	6729	6779	1092	18012	1567	15060	425	12129	25	959	143	2031	251	603	6006	3292	334	562	387	163	7400	164	569	469	271	658	443	410	367	1377	136	1291	3802	187	406	262	13222
1619	1.8	58	2539	99	125	66	70	39	46	580	4548	145	10958	8094	2069	17193	1743	10875	989	16470	352	966	180	2847	283	538	9126	4079	219	1685	287	70	1150	206	998	273	348	620	929	310	253	1065	112	1522	3545	390	353	493	12990
1620	1.9	36	1207	81	113	63	109	141	75	1289	11901	84	8741	10073	1268	15741	4036	12140	684	16688	3240	1241	170	4353	319	511	5980	4705	273	732	363	439	945	223	1622	358	322	364	869	343	228	1940	119	1160	3378	524	408	375	14743
1621	2	66	2076	240	113	73	99	102	125	179	2631	314	6203	4484	1428	17816	3214	12392	486	17732	2512	1140	243	3895	257	546	6200	3023	369	755	330	221	7114	200	902	332	326	540	508	343	418	1518	274	1125	3504	287	404	468	4589
1622	2.1	49	2009	1308	182	218	92	99	70	113	599	876	4293	4059	356	13465	866	11301	1264	19558	3647	1495	488	1526	119	229	3143	2799	562	596	417	348	6432	94	738	269	243	1089	496	383	226	1621	130	1032	4253	392	381	307	9493
1623	2.2	107	2322	584	452	771	67	141	97	110	81	798	3756	3521	602	15456	145	2721	1478	15575	3667	1091	196	1513	325	280	5141	3065	286	784	151	182	3354	194	1111	258	286	789	994	368	307	1439	90	657	3029	278	3607	456	12144
1624	2.3	737	411	119	114	800	136	94	80	122	64	370	622	7320	1053	16395	115	646	399	15489	5479	845	148	1082	189	507	3805	1866	278	711	450	377	938	252	436	290	402	646	642	356	277	1406	92	1270	2852	359	527	191	10616
1625	2.4	110	550	144	97	80	96	104	95	346	71	128	434	6470	542	11610	90	508	166	17415	6754	1030	265	621	97	782	4852	1328	323	680	287	314	684	155	410	314	313	722	660	416	509	1803	157	2026	2535	485	1334	312	12289
1626	2.5	146	138	116	199	73	1246	214	77	804	80	65	179	6150	1677	16317	97	904	338	18157	6573	925	232	1038	127	743	798	572	294	644	886	194	919	247	476	201	290	551	764	427	331	1271	293	2242	2663	424	629	1321	15137
1627	2.6	90	292	109	84	76	1974	269	80	747	101	361	199	7377	447	14242	406	1025	1477	16572	7170	531	177	1644	282	608	2234	234	335	574	726	145	9034	146	333	375	423	399	556	340	247	1005	179	2096	2909	415	598	7419	1895
1628	2.7	70	207	340	80	77	2695	388	70	106	107	527	138	6103	593	12998	2768	1438	1640	15656	6968	872	195	2619	334	1201	819	557	346	730	411	205	9631	166	753	299	332	387	654	370	371	860	127	1488	3340	353	219	4823	3961
1629	2.8	80	2434	508	122	190	1424	68	66	895	5334	1208	141	2513	212	10559	3094	424	121	7141	5311	953	130	2077	223	849	515	351	410	2306	461	336	5389	210	1133	323	334	407	928	412	207	816	111	1498	4149	440	987	553	9690
1630	2.9	90	1987	161	159	70	1445	75	53	3382	9020	974	269	4323	94	16939	1200	732	170	1232	2217	1161	174	466	155	450	638	323	291	420	416	247	1420	196	3690	277	360	900	644	418	316	970	80	1196	2319	479	1262	454	2170
1631	3	391	929	405	110	707	2396	72	103	252	8074	444	617	3448	184	2860	552	928	268	526	206	774	243	904	160	427	748	194	278	556	444	141	1275	244	981	186	323	2487	711	389	207	1030	150	941	3035	444	566	579	7561
1632	3.1	863	138	1274	97	318	4404	77	43	148	398	1125	3067	1735	703	3080	908	1079	156	539	880	859	215	709	193	451	851	305	244	582	669	442	1089	147	233	285	348	757	586	404	211	1017	219	1447	3919	476	237	443	7368
1633	3.2	3632	185	801	336	97	4349	227	49	103	83	151	5238	3206	379	932	810	1440	108	858	1021	708	133	1371	170	693	216	331	263	665	584	315	1103	133	505	321	317	563	527	413	285	1739	262	1906	3886	603	998	488	2986
1634	3.3	6767	392	152	108	94	3325	312	71	159	72	58	1497	4922	328	1158	815	647	78	854	402	912	124	2634	268	714	626	372	227	440	712	141	1103	223	382	603	291	1459	595	441	157	988	455	1388	2702	392	325	6661	12422
1635	3.4	364	1423	109	191	74	4707	165	36	298	60	209	1932	6114	699	1407	772	480	301	444	267	1113	189	4144	235	1065	761	554	348	604	436	196	1130	179	600	355	324	8161	630	640	189	1213	99	918	2943	319	710	14395	15146
1636	3.5	81	2162	85	120	76	2616	123	58	131	73	98	4039	7255	96	419	1709	531	305	169	138	1137	150	2831	251	684	579	1680	179	670	447	288	1126	231	492	370	337	28874	545	1204	219	1414	200	1058	3126	348	333	6764	13962
1637	3.6	92	3323	69	199	59	2198	372	55	127	67	608	3777	3442	68	627	2467	88	1446	95	91	1226	155	1264	176	805	609	1674	204	669	639	264	3267	105	479	173	182	2624	553	801	176	1126	96	828	2295	323	453	1249	7579
1638	3.7	277	2632	113	84	91	2707	134	73	87	49	2381	3541	5494	65	2814	1319	93	878	101	92	1509	168	1023	334	864	546	992	287	645	906	478	7239	157	510	415	196	895	874	767	207	1078	74	699	1705	435	539	1053	5629
1639	3.8	145	157	168	686	114	1409	112	39	106	56	1494	1944	4818	85	868	3720	108	3420	343	146	1167	204	604	109	810	682	1802	244	624	429	218	4488	19	360	415	378	11289	565	728	206	1175	234	862	3239	515	578	1248	12270
1640	3.9	90	124	1434	1781	98	769	110	449	86	68	1024	2436	4976	72	2076	3272	278	4042	974	736	759	153	1125	372	756	720	4267	221	538	329	104	1250	126	537	291	363	20695	548	624	255	1557	181	755	2748	529	384	1076	9384
1641	4	72	1041	1938	1172	120	1769	99	465	102	56	1524	2758	7232	82	1870	956	325	2958	581	793	989	180	1442	246	292	539	5520	671	621	301	109	845	203	234	247	390	1135	256	511	165	581	283	566	2139	308	250	937	987
1642	4.1	115	945	576	77	75	1306	432	652	115	668	666	3510	7399	80	2674	416	354	829	197	1742	555	162	1918	150	553	397	2566	368	687	850	286	2809	153	270	259	326	1423	443	453	614	686	233	1285	3094	357	415	698	3114
1643	4.2	112	1319	207	65	80	2649	210	101	71	80	774	1659	6555	53	1270	2123	203	110	1531	3075	1194	186	2864	225	456	796	2174	233	525	675	272	4941	124	178	319	501	26301	949	486	188	1349	218	676	2517	416	799	619	3628
1644	4.3	106	144	97	70	38	119	220	145	124	73	1280	3060	5992	325	1215	3000	322	536	207	808	1201	232	1001	121	412	490	4489	426	550	503	210	10754	145	167	265	397	29052	668	517	413	366	125	1283	1924	217	5095	360	4563
1645	4.4	124	393	85	92	71	209	232	112	100	78	1240	2516	8261	499	1066	4394	132	543	87	2248	1917	153	1048	291	448	758	3124	4405	755	587	101	2879	107	157	323	498	16997	620	479	361	718	144	1729	1022	415	788	437	10258
1646	4.5	130	1463	66	59	99	134	237	78	97	234	105	3628	4794	1375	479	992	474	648	99	1081	676	246	1455	398	678	647	2156	3458	616	586	343	8014	420	195	348	354	1159	641	552	254	1277	215	1662	478	183	1415	394	8411
1647	4.6	205	383	78	57	75	103	121	91	111	55	551	3087	6647	892	1145	379	609	841	97	2814	733	306	1549	377	675	571	1589	3246	649	754	232	6355	325	108	553	574	10500	779	478	249	1889	437	1775	4761	271	2695	470	2249
1648	4.7	150	304	71	83	83	367	106	115	124	72	419	2932	2606	100	1580	582	840	856	839	3197	595	232	263	221	898	664	840	2513	656	421	172	6905	276	205	409	660	23344	261	496	352	1453	100	807	1687	398	525	14041	857
1649	4.8	207	118	96	90	84	803	113	86	294	65	507	2650	1300	300	1089	449	800	113	169	412	737	127	808	312	891	402	855	3112	471	465	94	1660	178	248	387	305	24719	282	392	261	1711	160	858	2781	310	2808	3236	14592
1650	4.9	433	150	136	177	186	950	83	88	117	58	625	1675	1434	86	819	172	1390	112	224	318	977	163	1631	175	574	881	636	2869	446	868	390	855	202	128	352	296	26122	326	527	275	1258	195	366	1481	297	2642	384	14849
1651	5	88	213	1104	100	802	123	49	297	95	60	269	1497	1948	97	530	207	426	245	691	283	781	143	2906	211	435	304	393	2736	499	325	393	3145	242	131	496	405	18459	277	460	315	1701	356	973	817	346	6328	553	12165
1652	5.1	43	62	679	67	1454	90	116	162	263	90	558	1885	2348	74	420	105	1218	170	511	151	1020	155	2317	254	800	564	630	2751	520	748	245	4778	312	111	222	644	15043	295	475	243	1064	138	904	632	360	141	654	12618
1653	5.2	72	102	123	96	713	138	94	78	429	79	772	3979	3257	205	110	520	490	1159	705	100	890	173	1622	183	710	309	378	2541	563	537	107	1228	256	129	335	338	25765	177	515	305	1057	63	655	630	426	198	445	12102
1654	5.3	81	130	163	101	609	110	100	85	111	51	791	2805	6015	87	107	449	581	1069	357	336	827	279	1135	329	424	983	242	2651	698	350	442	1366	249	115	235	450	12580	193	482	162	1583	183	680	1911	337	252	547	11437
1655	5.4	69	204	136	254	690	107	108	101	78	56	1197	2287	6773	134	466	766	1013	853	420	696	841	250	801	612	540	331	316	2109	701	645	427	1367	134	169	310	484	499	715	434	402	2094	95	1787	1411	388	382	920	10111
1656	5.5	50	736	148	124	1171	107	354	92	85	73	1280	2113	7366	512	108	267	793	581	562	436	664	223	688	436	505	552	483	1975	703	387	314	11435	162	267	248	479	4229	747	434	367	1474	238	791	3588	469	537	6698	11110
1657	5.6	54	978	131	677	567	1011	172	66	104	372	645	1430	6532	109	145	89	609	942	611	225	964	194	1458	452	590	724	484	2267	659	713	188	6862	130	115	318	437	2646	272	463	394	1660	93	1202	3234	344	367	5263	5796
1658	5.7	724	620	106	839	431	1670	128	83	193	1360	691	2529	3016	90	674	80	614	580	614	785	1065	261	3425	240	981	223	421	1627	608	430	148	7811	178	222	215	593	855	200	507	344	1921	181	710	1875	411	3750	4164	13059
1659	5.8	501	2170	117	444	758	2983	169	58	987	119	631	2476	4561	201	1597	94	474	805	1331	227	1013	279	3528	235	443	363	330	2737	515	405	54	5586	148	264	339	612	850	246	425	474	1239	142	282	1013	355	665	1871	2477
1660	5.9	426	8194	99	134	583	1484	177	64	1013	69	359	2308	2882	199	743	69	366	231	824	174	1055	206	1720	396	648	913	413	1928	625	520	233	1637	180	89	369	645	7882	544	446	419	1545	224	469	1651	512	708	1102	5233
1661	6	76	10371	606	105	172	1626	131	110	114	79	59	3299	3950	149	61	75	718	78	1054	688	909	171	505	234	704	325	306	1755	679	406	96	2454	78	200	328	737	1878	283	396	245	2071	185	366	3743	460	595	698	12719
1662	6.1	77	19262	289	310	105	260	65	73	109	40	50	2324	686	101	61	472	638	58	1017	1770	1122	236	1380	205	973	736	373	1259	721	624	240	3580	137	164	292	346	21329	203	529	285	1585	173	699	3197	467	2280	387	16595
1663	6.2	65	13101	1226	84	266	497	72	352	98	60	78	3749	4181	160	70	868	1071	100	959	3254	708	198	441	307	661	258	494	1973	776	387	182	1454	154	108	507	466	1056	196	491	389	1604	221	771	3043	468	932	3312	11021
1664	6.3	94	13679	248	91	817	1944	115	410	99	30	44	2431	2439	112	54	2237	790	40	824	3788	876	225	788	333	1055	541	538	1930	675	394	472	1109	139	241	517	458	488	323	600	456	1115	339	1238	3097	286	2432	513	15406
1665	6.4	104	2828	109	408	608	946	214	360	101	63	52	1841	3403	121	59	1697	859	52	696	2063	678	120	1581	378	1107	581	378	1662	755	466	169	478	84	292	412	538	547	261	525	343	1157	439	1237	2004	325	1017	1075	10487
1666	6.5	84	21200	148	786	93	136	101	206	99	89	57	1787	2711	45	222	3198	179	56	271	1655	769	141	3236	234	760	297	471	2103	501	499	428	962	130	259	539	421	15232	196	419	283	2022	499	1208	943	460	3537	488	2993
1667	6.6	86	13749	88	724	92	87	120	109	94	80	56	2080	2280	863	1224	576	651	66	495	1729	1068	214	3392	139	924	374	386	1402	609	513	80	3996	112	250	491	515	32264	224	425	290	1142	335	1053	441	384	996	365	6477
1668	6.7	68	16380	96	1240	67	89	182	108	113	89	59	2370	3603	534	959	471	147	657	343	1977	379	136	2388	291	643	252	352	1627	509	381	540	8547	180	270	1194	445	32462	322	375	132	786	463	1145	4376	350	979	395	5938
[truncated: 2 more columns]
